# Supplementary material for: Exploring second coordination sphere effects in flavodiiron nitric oxide reductase model complexes
Source: Royal Society of Chemistry journal article supplement (doi:10.1039/d3dt02828c), 2023-01-01
Supplement: d3dt02828c1.pdf [file d3dt02828c1.pdf]

## **Exploring Second Coordination Sphere Effects in Flavodiiron Nitric Oxide Reductase Model Complexes**

Abigail J. Bracken<sup>a</sup>, Hai T. Dong,<sup>a</sup> Michael O. Lengel<sup>a</sup>, Nicolai Lehnert<sup>a,\*</sup>

<sup>a</sup> Department of Chemistry, The University of Michigan, Ann Arbor, Michigan 48109-1055, United States

# Table of Contents

## <sup>1</sup>H-NMR spectra:

|                                             |    |
|---------------------------------------------|----|
| H[BPMP(NHCO <sup>t</sup> Bu) <sub>2</sub> ] | S3 |
|---------------------------------------------|----|

## Solid state IR spectra:

|                                                                          |    |
|--------------------------------------------------------------------------|----|
| IR (KBr) of <b>0</b> , <b>1</b> , and <b>2</b>                           | S4 |
| IR (KBr) of <b>1</b> and <b>1</b> with CH <sub>3</sub> <sup>13</sup> COO | S5 |
| IR (KBr) of <b>0</b> and <b>0(NO)<sub>2</sub></b> with CoCp <sub>2</sub> | S6 |

## Solution IR spectra:

|                                                                                                                     |     |
|---------------------------------------------------------------------------------------------------------------------|-----|
| <b>0</b> , <b>1</b> , <b>2</b> , <b>0(NO)<sub>2</sub></b> , <b>1(NO)<sub>2</sub></b> , and <b>2(NO)<sub>2</sub></b> | S7  |
| <b>0</b> and <b>0(NO)<sub>2</sub></b>                                                                               | S8  |
| <b>1</b> and <b>1(NO)<sub>2</sub></b>                                                                               | S9  |
| <b>2</b> and <b>2(NO)<sub>2</sub></b>                                                                               | S10 |
| <b>0</b> , <b>1</b> , and <b>2</b>                                                                                  | S11 |
| <b>0(NO)<sub>2</sub></b> , <b>1(NO)<sub>2</sub></b> , and <b>2(NO)<sub>2</sub></b>                                  | S12 |
| <b>0(<sup>15</sup>NO)<sub>2</sub></b> SEC-IR                                                                        | S13 |
| Comparison of <b>0(NO)<sub>2</sub></b> and <b>0(<sup>15</sup>NO)<sub>2</sub></b> after reduction                    | S14 |

## UV-Vis spectra:

|                                                                                    |     |
|------------------------------------------------------------------------------------|-----|
| <b>0</b> and <b>0(NO)<sub>2</sub></b>                                              | S15 |
| <b>1</b> and <b>1(NO)<sub>2</sub></b>                                              | S16 |
| <b>2</b> and <b>2(NO)<sub>2</sub></b>                                              | S17 |
| <b>0</b> , <b>1</b> , and <b>2</b>                                                 | S18 |
| <b>0(NO)<sub>2</sub></b> , <b>1(NO)<sub>2</sub></b> , and <b>2(NO)<sub>2</sub></b> | S19 |
| <b>0(NO)<sub>2</sub></b> with CoCp <sub>2</sub>                                    | S20 |

## Comparative IR Spectra:

|                                                                                                                                              |     |
|----------------------------------------------------------------------------------------------------------------------------------------------|-----|
| IR (KBr) of <b>0</b> , <b>1</b> , <b>2</b> , <b>0(NO)<sub>2</sub></b> , <b>1(NO)<sub>2</sub></b> , and <b>2(NO)<sub>2</sub></b> , stacked    | S21 |
| Difference spectra of IR (KBr) of <b>0/0(NO)<sub>2</sub></b> , <b>1/1(NO)<sub>2</sub></b> , and <b>2/2(NO)<sub>2</sub></b>                   | S22 |
| Solution IR of <b>0</b> , <b>1</b> , <b>2</b> , <b>0(NO)<sub>2</sub></b> , <b>1(NO)<sub>2</sub></b> , and <b>2(NO)<sub>2</sub></b> , stacked | S23 |
| Difference spectra of Solution IR of <b>0/0(NO)<sub>2</sub></b> , <b>1/1(NO)<sub>2</sub></b> , and <b>2/2(NO)<sub>2</sub></b>                | S24 |

## Crystal Structures:

|                                                                   |        |
|-------------------------------------------------------------------|--------|
| Crystal structure of <b>0</b> and essential structural parameters | S25-70 |
| Crystal structure of <b>1</b> and essential structural parameters | S71-92 |

## DFT Optimized Structures:

|                                                                                              |         |
|----------------------------------------------------------------------------------------------|---------|
| DFT optimized structure of <b>0(NO)<sub>2</sub></b> with BP86/TZVP and Cartesian coordinates | S93-92  |
| DFT optimized structure of <b>1(NO)<sub>2</sub></b> with BP86/TZVP and Cartesian coordinates | S96-99  |
| DFT optimized structure of <b>2(NO)<sub>2</sub></b> with BP86/TZVP and Cartesian coordinates | S99-102 |

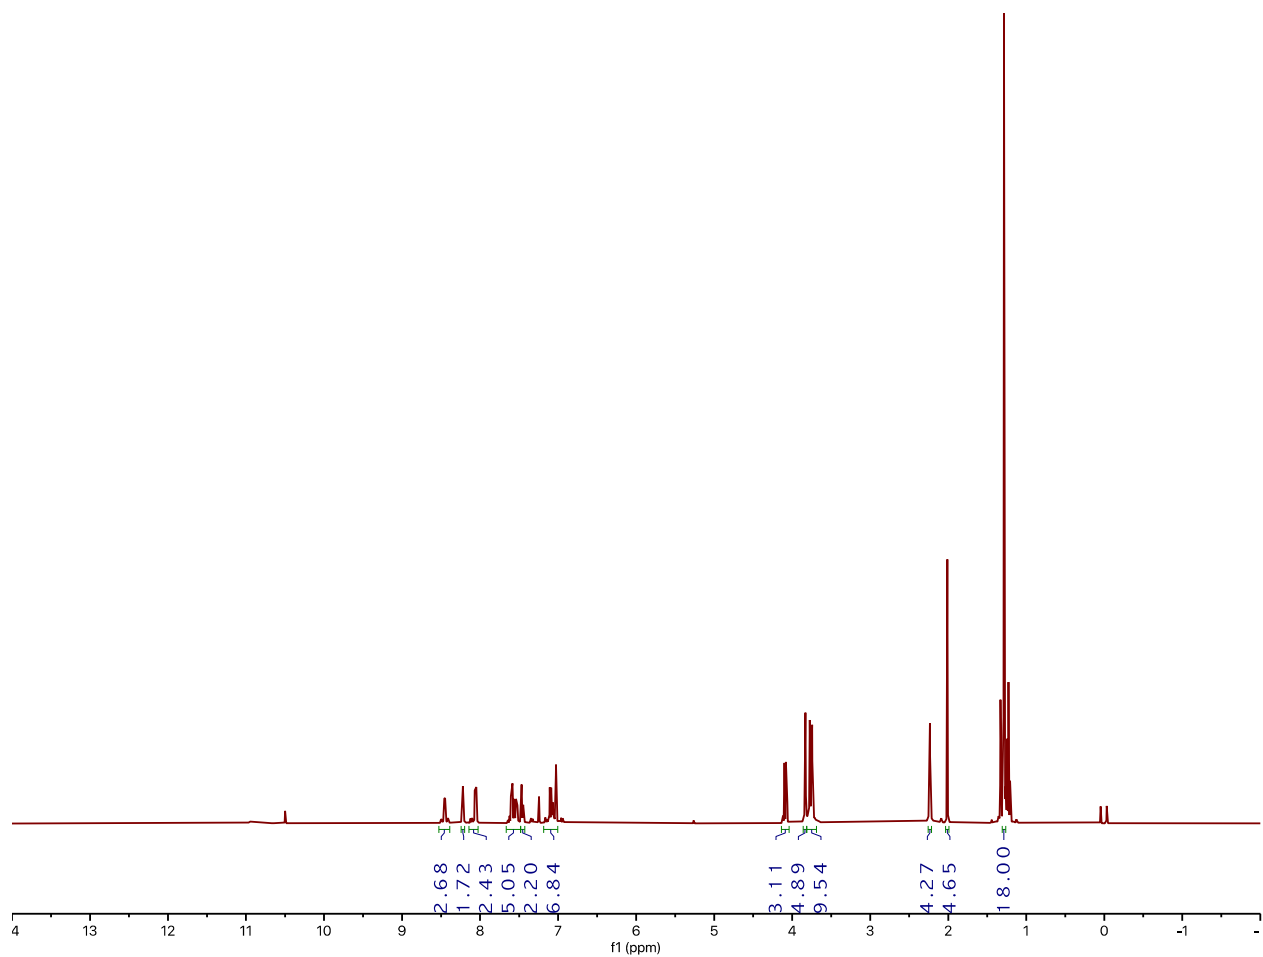

**Figure S1.** <sup>1</sup>H-NMR spectrum of H[BPMP(NHCO<sup>t</sup>Bu)<sub>2</sub>] in CDCl<sub>3</sub> at room temperature.

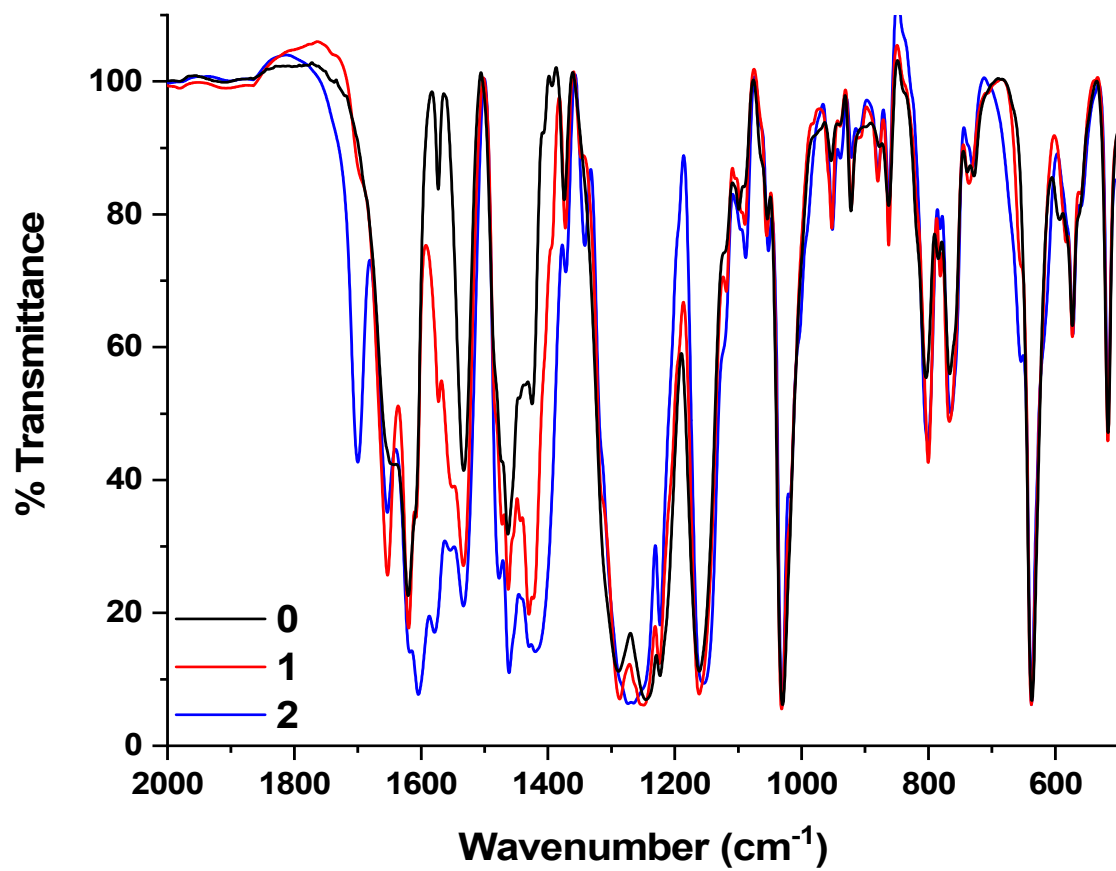

Figure S2. IR (KBr) spectra of solid precursor complexes **0**, **1**, and **2**.

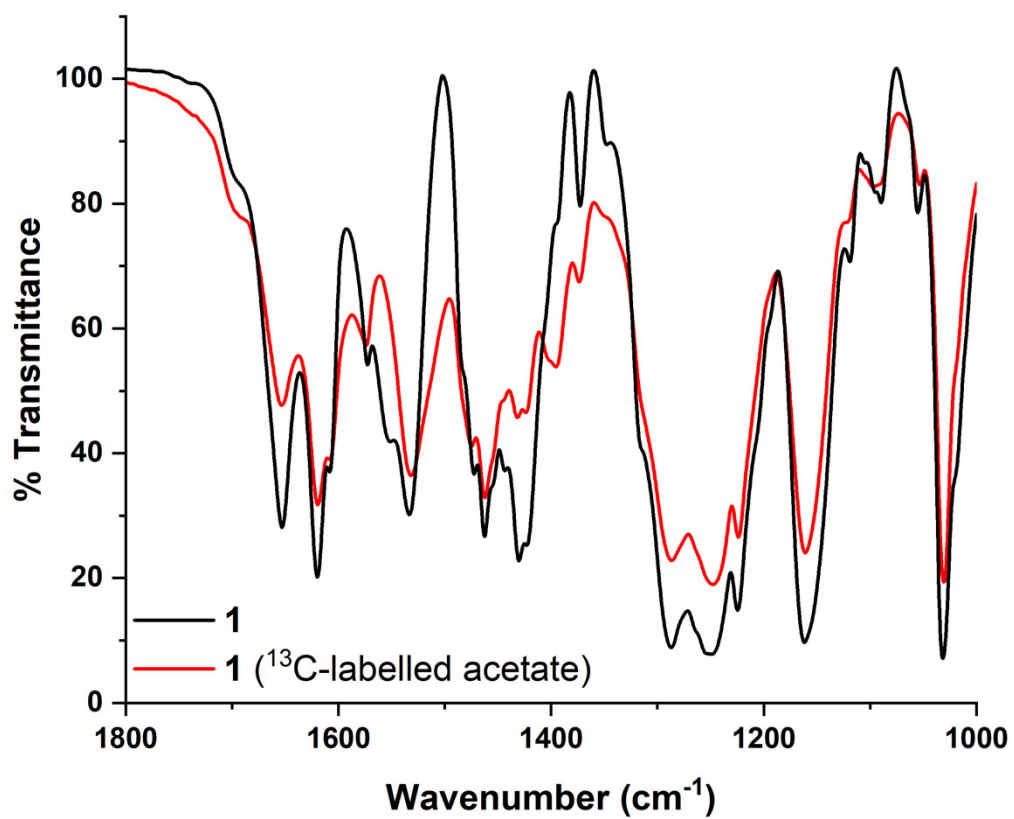

**Figure S3.** IR (KBr) spectra of solid precursor complexes **1** and **1** with CH<sub>3</sub><sup>13</sup>COO.

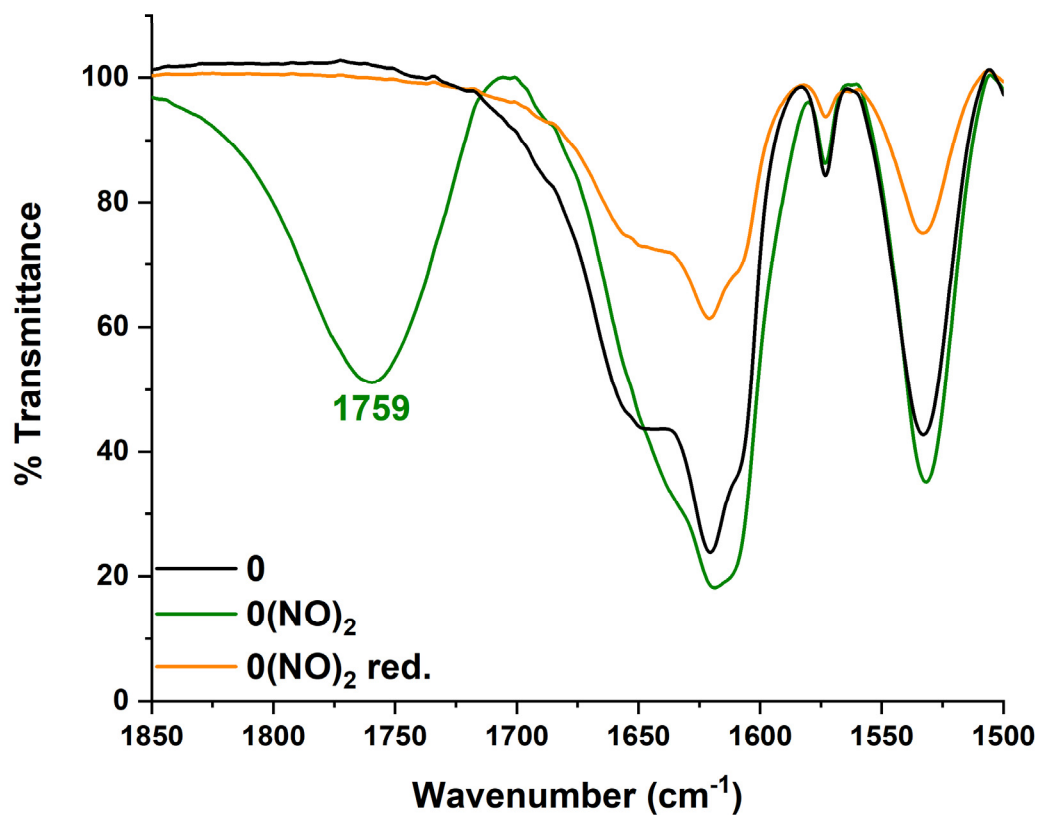

**Figure S4.** IR (KBr) spectra of **0**, and **0(NO)<sub>2</sub>** before and after reduction with 1 equivalent of CoCp<sub>2</sub>. The product after reduction was precipitated with diethyl ether from a CH<sub>2</sub>Cl<sub>2</sub> solution, and does not show any DNIC signals.

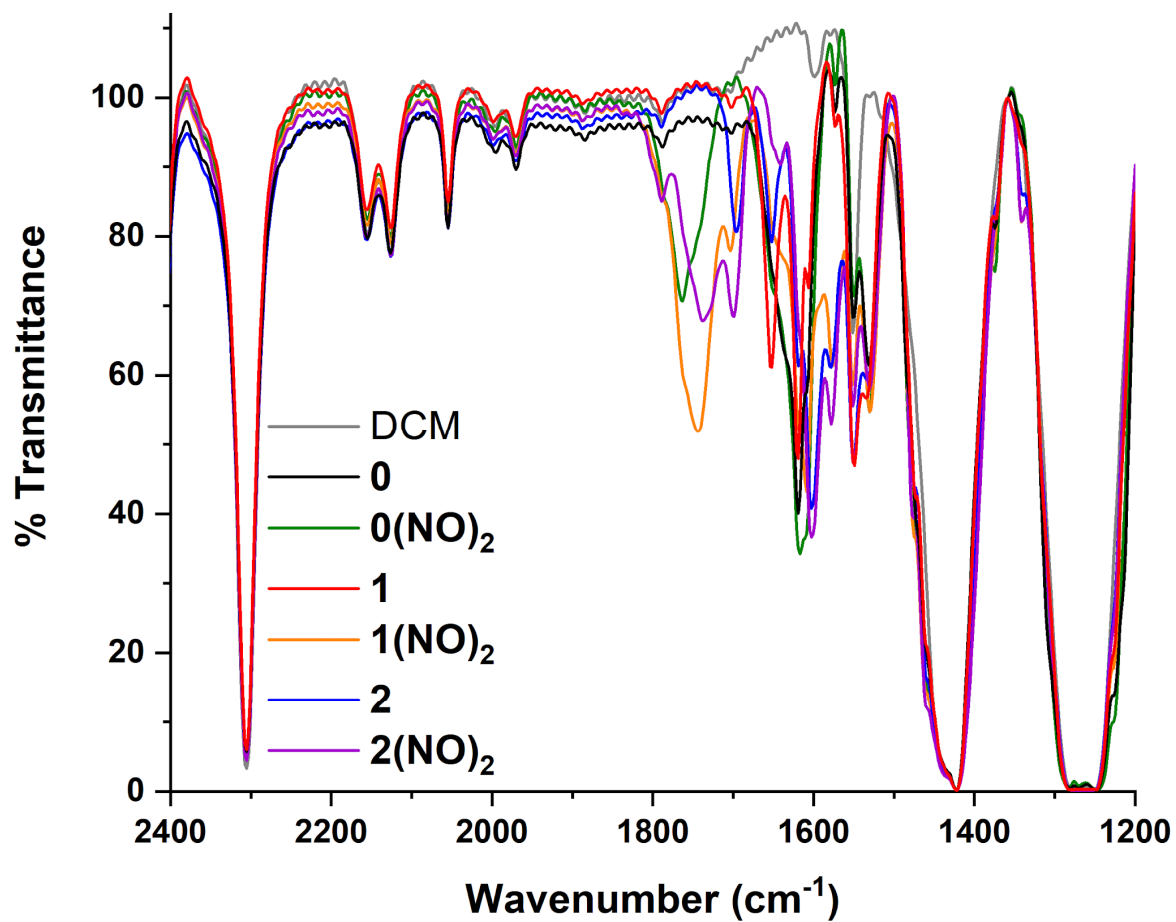

**Figure S5.** Solution IR spectra of precursor complexes **0**, **1**, and **2** and nitrosylated complexes **0(NO)<sub>2</sub>**, **1(NO)<sub>2</sub>**, and **2(NO)<sub>2</sub>**, respectively. Conditions were 10 mM of precursor in CH<sub>2</sub>Cl<sub>2</sub>.

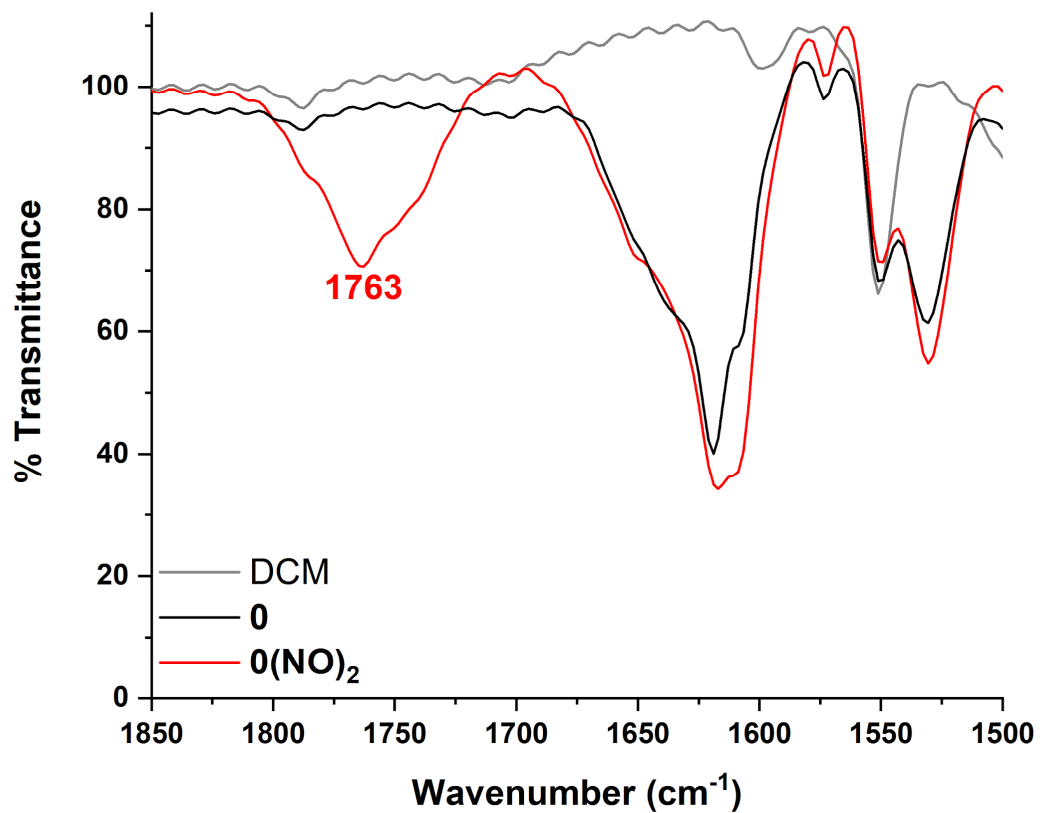

**Figure S6.** Solution IR spectra of precursor complex **0** and nitrosylated complex **0(NO)<sub>2</sub>**. Conditions were 10 mM of precursor in CH<sub>2</sub>Cl<sub>2</sub>.



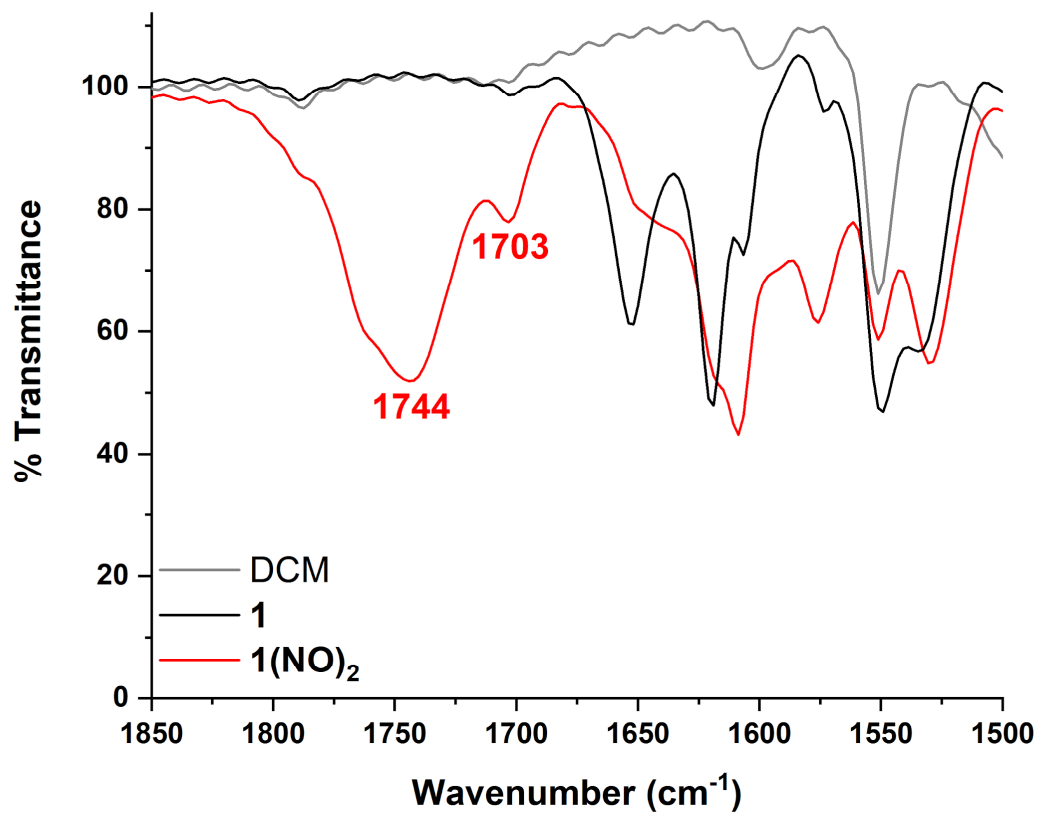

**Figure S7.** Solution IR spectra of precursor complex **1** and nitrosylated complex **1(NO)<sub>2</sub>**. Conditions were 10 mM of precursor in CH<sub>2</sub>Cl<sub>2</sub>.

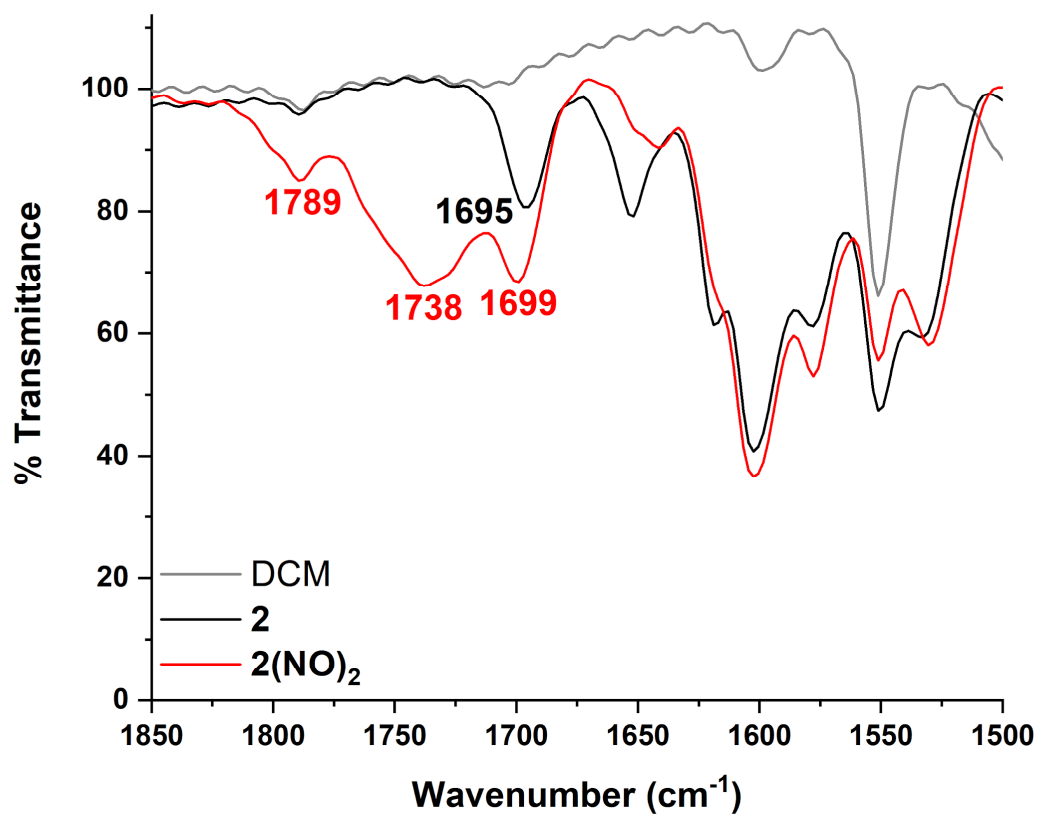

**Figure S8.** Solution IR spectra of precursor complex **2** and nitrosylated complex **2(NO)<sub>2</sub>**. Conditions were 10 mM of precursor in CH<sub>2</sub>Cl<sub>2</sub>.

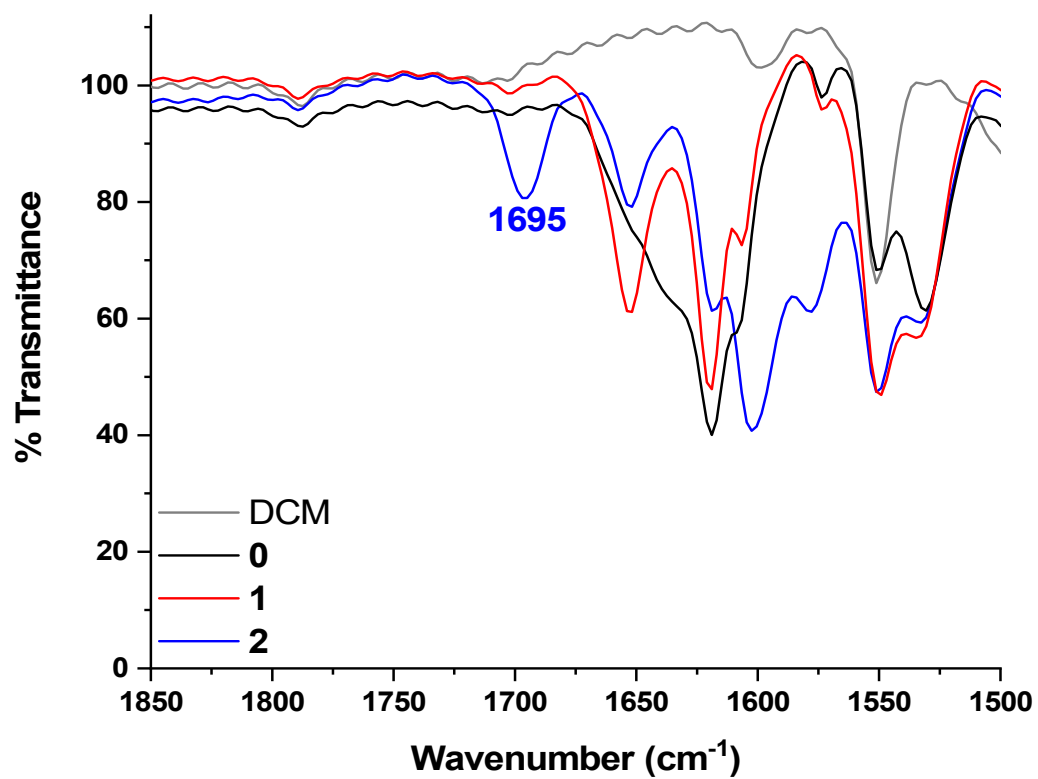

**Figure S9.** Solution IR spectra of precursor complexes **0**, **1**, and **2**. Conditions were 10 mM in CH<sub>2</sub>Cl<sub>2</sub>.

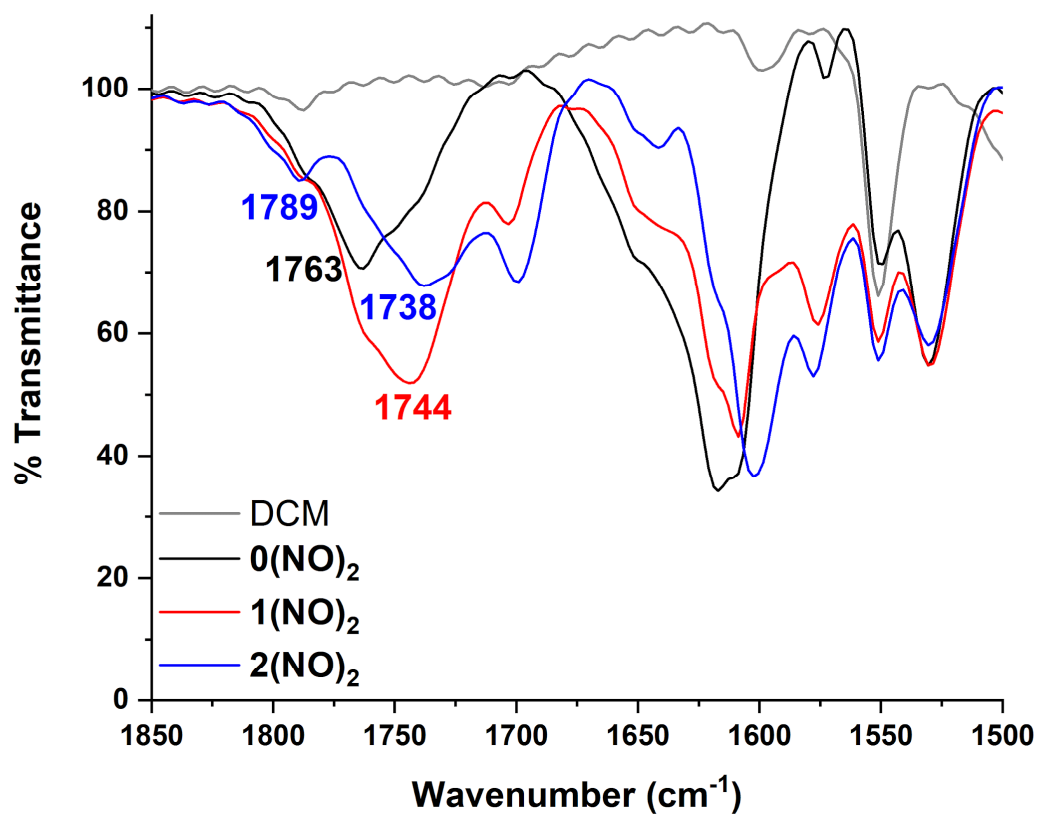

**Figure S10.** Solution IR spectra of nitrosylated complexes **0(NO)<sub>2</sub>**, **1(NO)<sub>2</sub>**, and **2(NO)<sub>2</sub>**. Conditions were 10 mM of precursor in CH<sub>2</sub>Cl<sub>2</sub>.

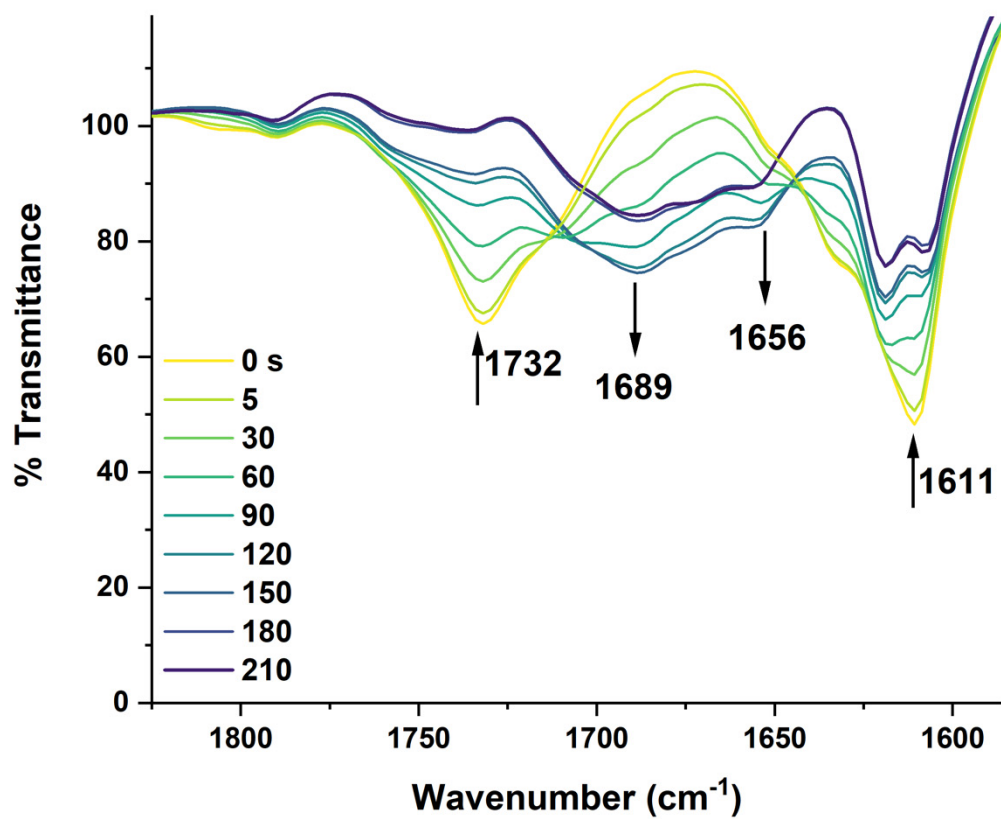

**Figure S11.** IR-spectroelectrochemical data of  $0(^{15}\text{NO})_2$  with the potential held at -1.4 V vs. Ag wire. Conditions were 10 mM in  $\text{CH}_2\text{Cl}_2$  with 0.1 M [TBA](OTf) as the supporting electrolyte.

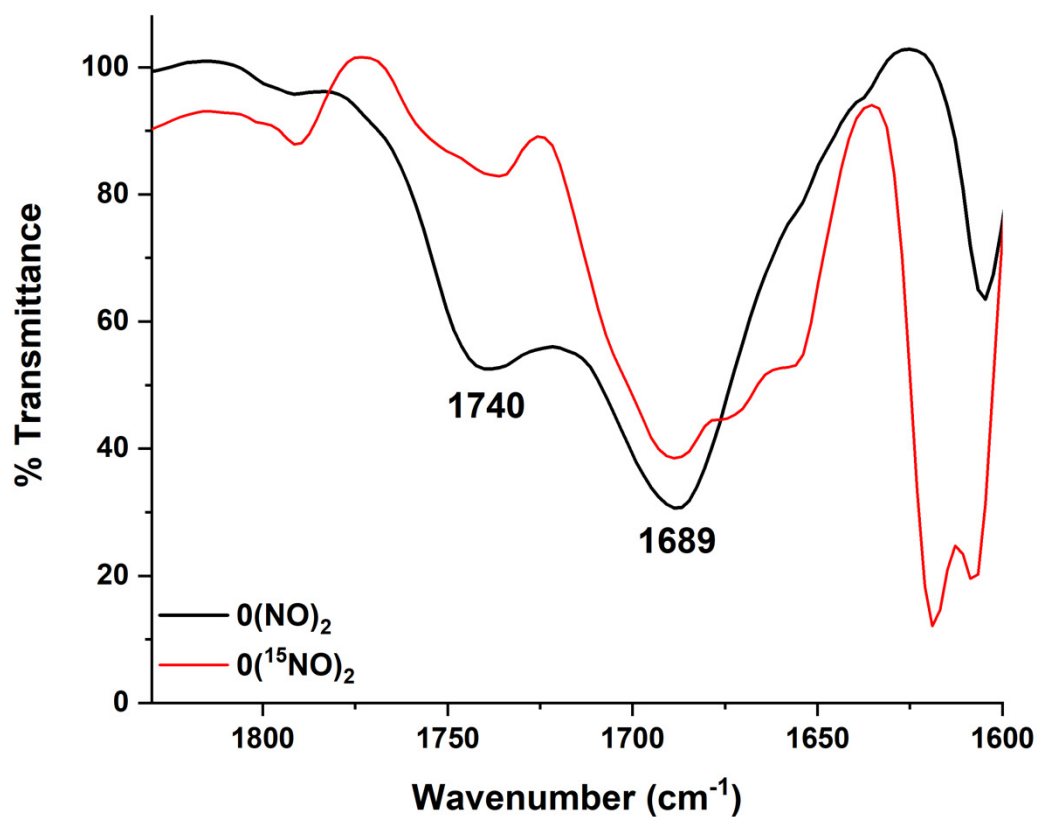

**Figure S12.** Solution IR data of  $0(\text{NO})_2$  and  $0(^{15}\text{NO})_2$  after holding the potential for 210 seconds at -1.4 V. Conditions were 10 mM in  $\text{CH}_2\text{Cl}_2$  with 0.1 M  $[\text{TBA}](\text{OTf})$  as the supporting electrolyte.

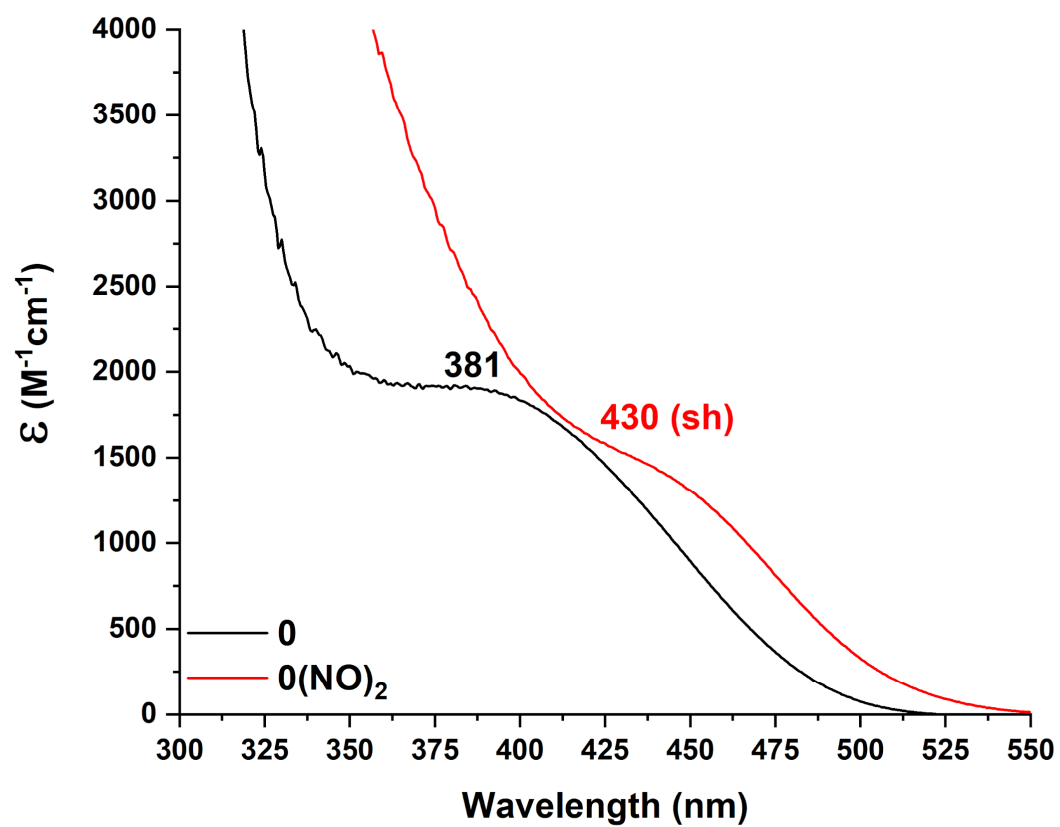

**Figure S13.** UV-Vis spectra of precursor complex **0** and nitrosylated complex **0(NO)<sub>2</sub>**. Conditions were 0.2 mM of precursor in CH<sub>2</sub>Cl<sub>2</sub>.

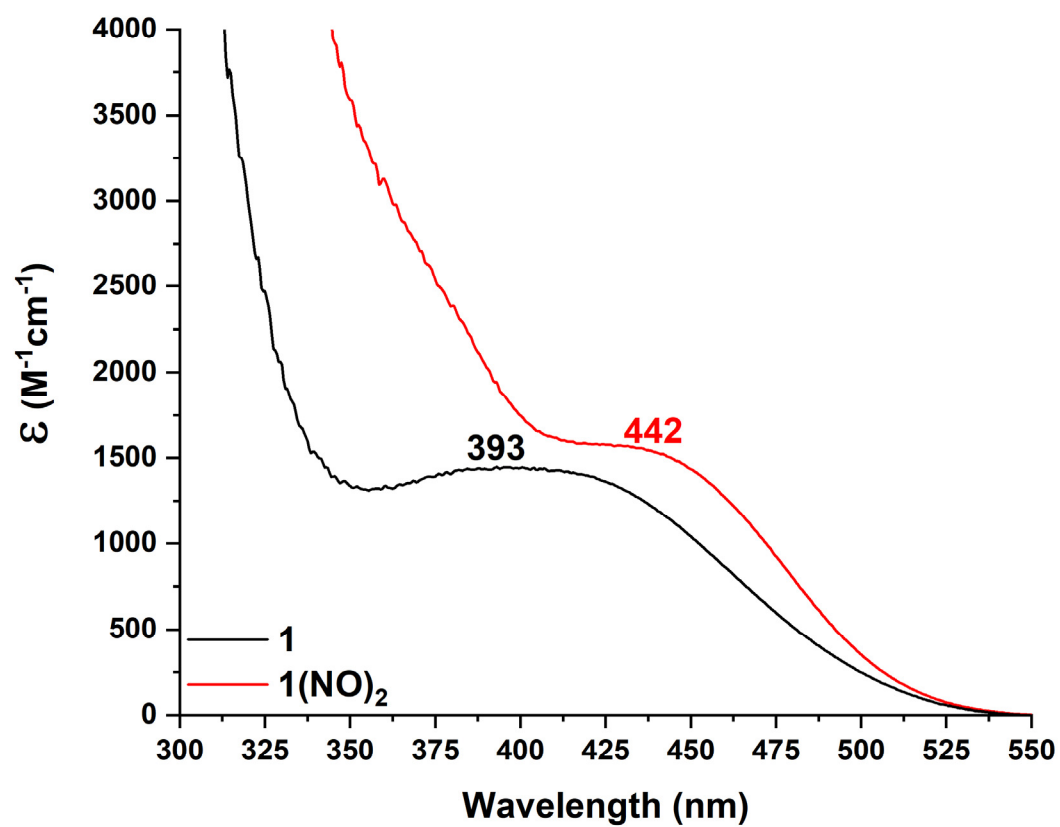

**Figure S14.** UV-Vis spectra of precursor complex **1** and nitrosylated complex **1(NO)<sub>2</sub>**. Conditions were 0.2 mM of precursor in CH<sub>2</sub>Cl<sub>2</sub>.



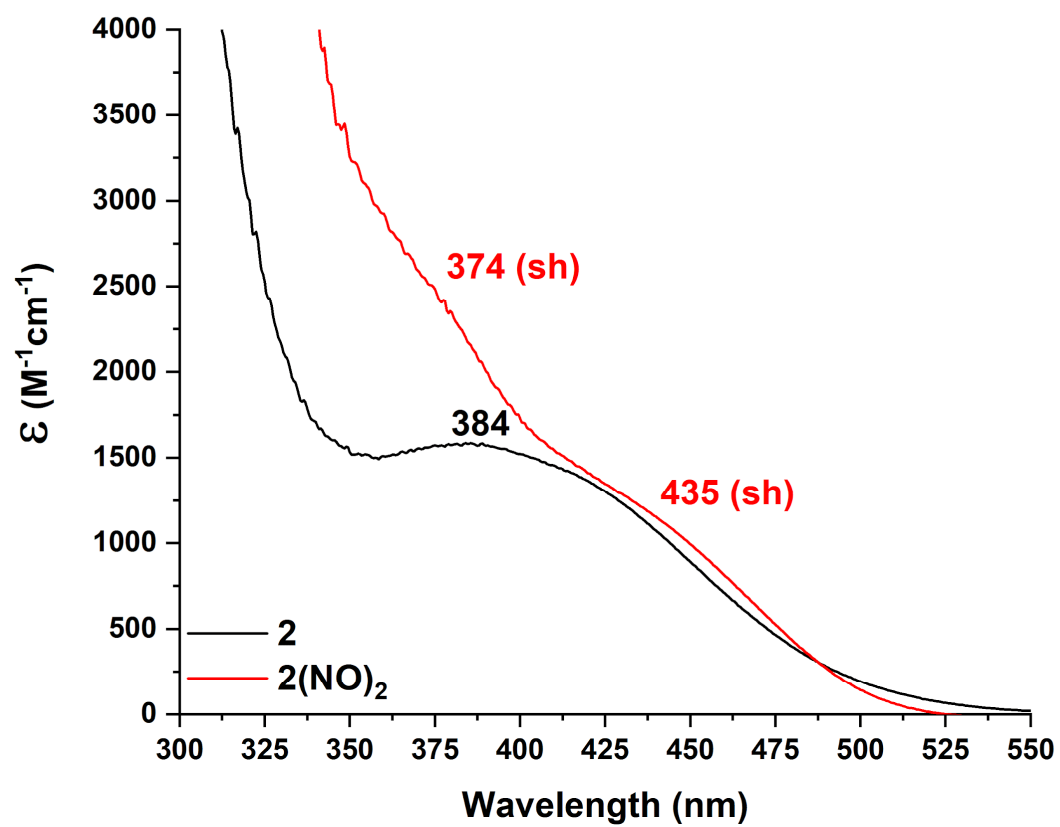

**Figure S15.** UV-Vis spectra of precursor complex **2** and nitrosylated complex **2(NO)<sub>2</sub>**. Conditions were 0.2 mM of precursor in CH<sub>2</sub>Cl<sub>2</sub>.

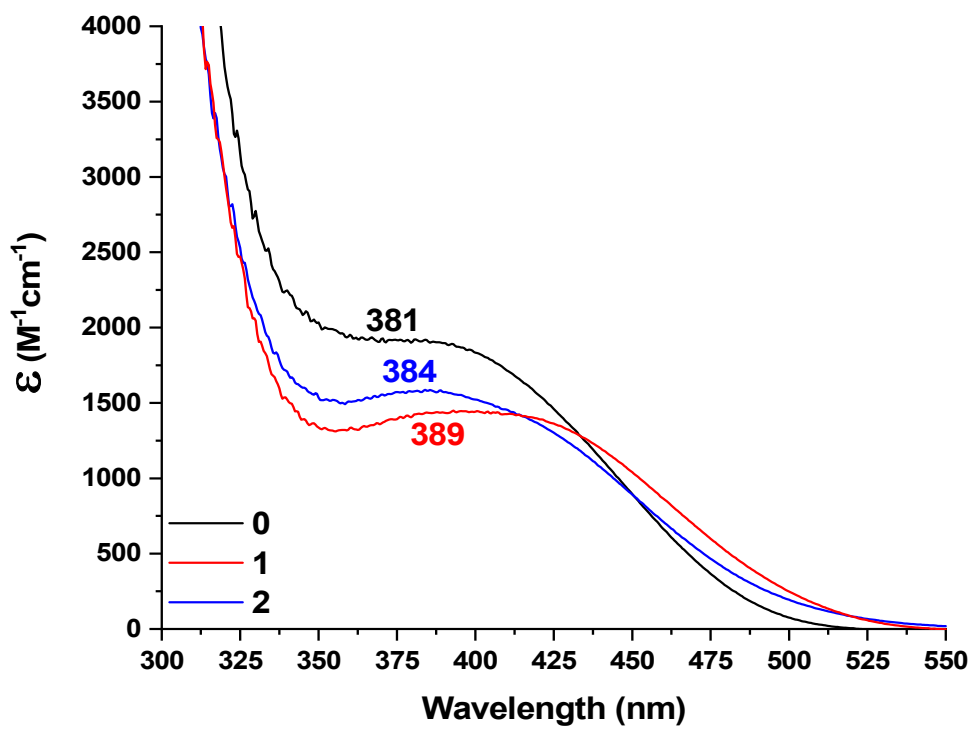

**Figure S16.** UV-Vis spectra of precursor complexes **0**, **1**, and **2**. Conditions were 0.2 mM in  $\text{CH}_2\text{Cl}_2$ .

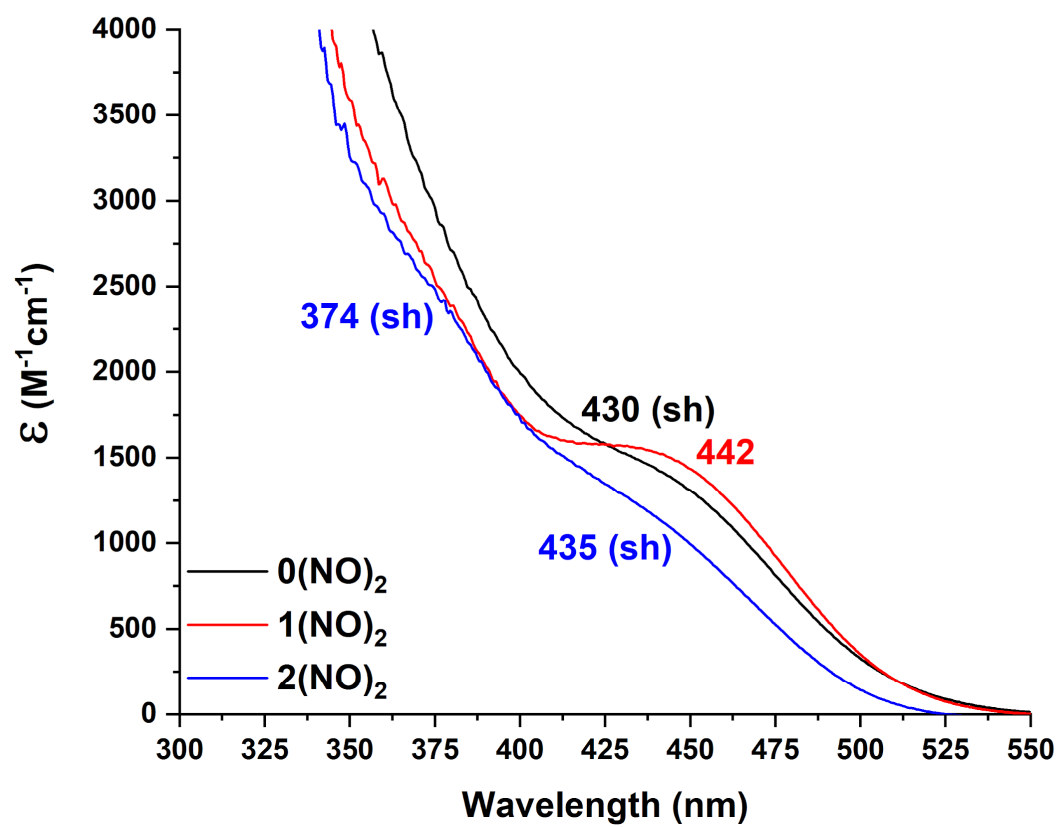

**Figure S17.** UV-vis spectra of nitrosylated complexes  $0(\text{NO})_2$ ,  $1(\text{NO})_2$ , and  $2(\text{NO})_2$ . Conditions were 0.2 mM of precursor in  $\text{CH}_2\text{Cl}_2$ .

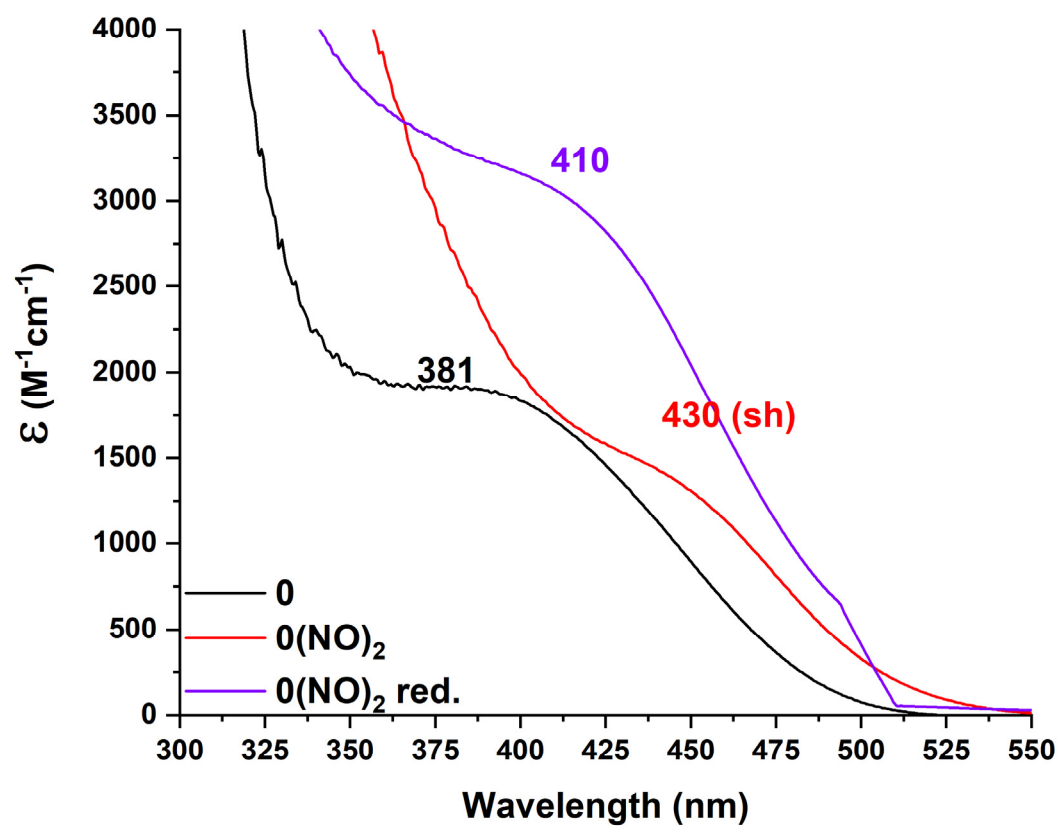

**Figure S18.** UV-vis spectra of **0** and **0(NO)<sub>2</sub>** before and after reduction with 1 equivalent of CoCp<sub>2</sub>. Conditions were 0.2 mM of precursor in CH<sub>2</sub>Cl<sub>2</sub>.

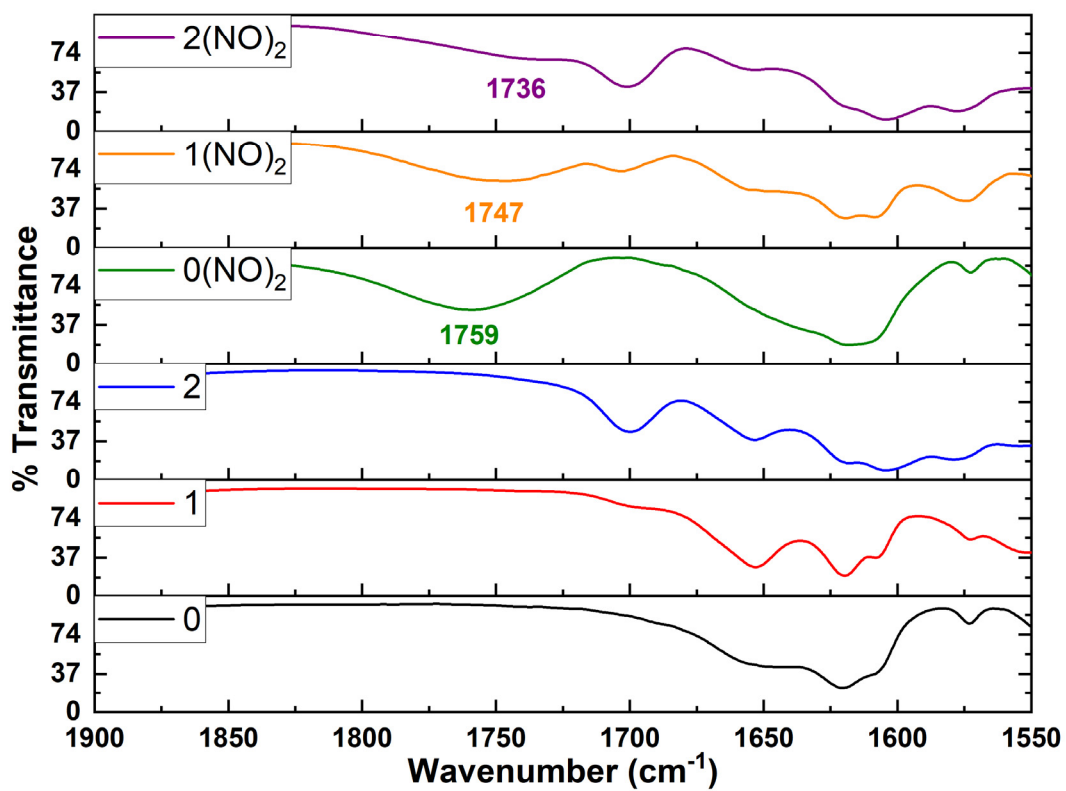

**Figure S19.** Stacked IR (KBr) spectra of the diferrous precursors **0**, **1**, and **2** and of the nitrosylated complexes **0(NO)<sub>2</sub>**, **1(NO)<sub>2</sub>**, and **2(NO)<sub>2</sub>**.

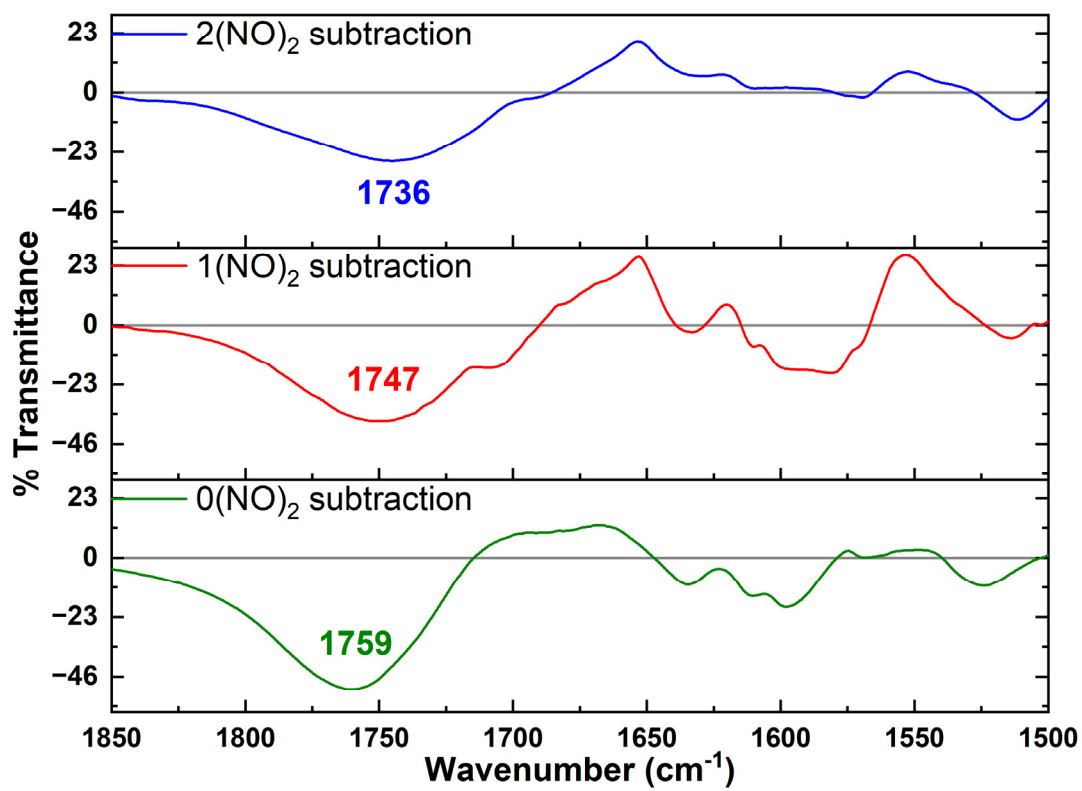

**Figure S20.** Difference spectra obtained from subtracting the IR (KBr) spectrum of **0**(NO)<sub>2</sub> from **0** (bottom), **1**(NO)<sub>2</sub> from **1** (middle), and **2**(NO)<sub>2</sub> from **2** (top). The NO vibrational bands are labelled.

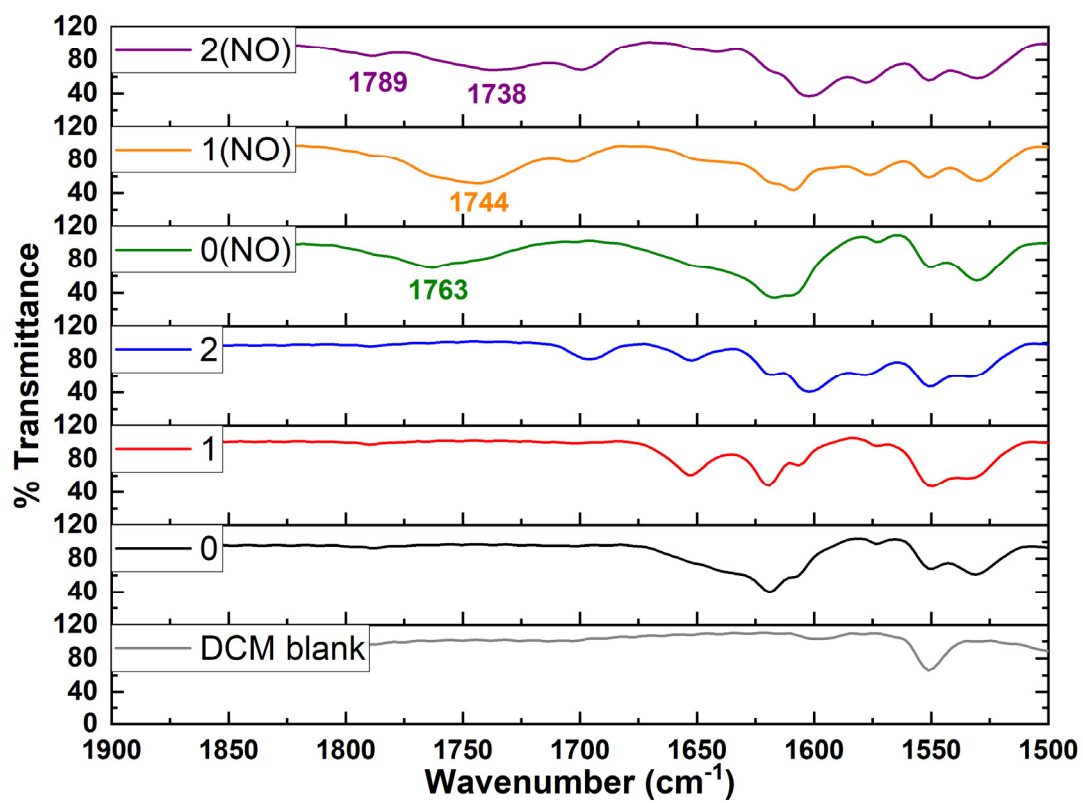

**Figure S21.** Stacked solution IR spectra of the diferrous precursors **0**, **1**, and **2** and of the nitrosylated complexes **0(NO)<sub>2</sub>**, **1(NO)<sub>2</sub>**, and **2(NO)<sub>2</sub>**, at a concentration of 10 mM in CH<sub>2</sub>Cl<sub>2</sub>.

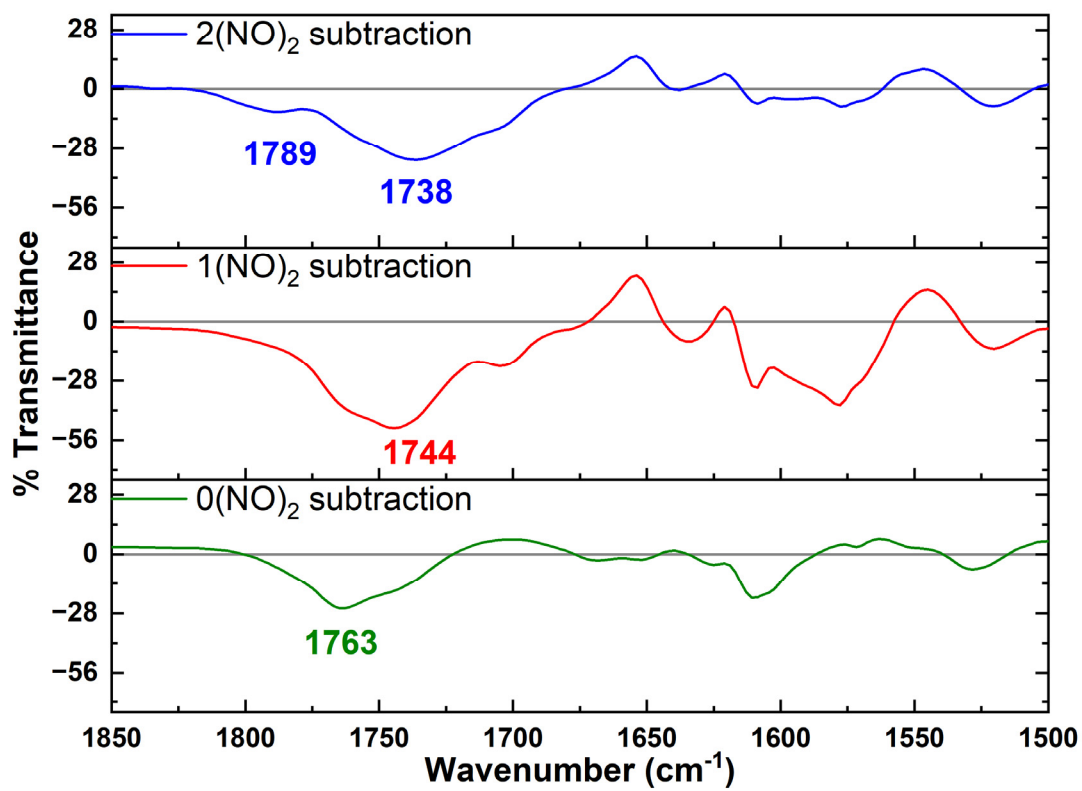

**Figure S22.** Difference spectra obtained from subtracting the solution IR spectrum of **0(NO)<sub>2</sub>** from **0** (bottom), **1(NO)<sub>2</sub>** from **1** (middle), and **2(NO)<sub>2</sub>** from **2** (top). The NO vibrational bands are labelled.



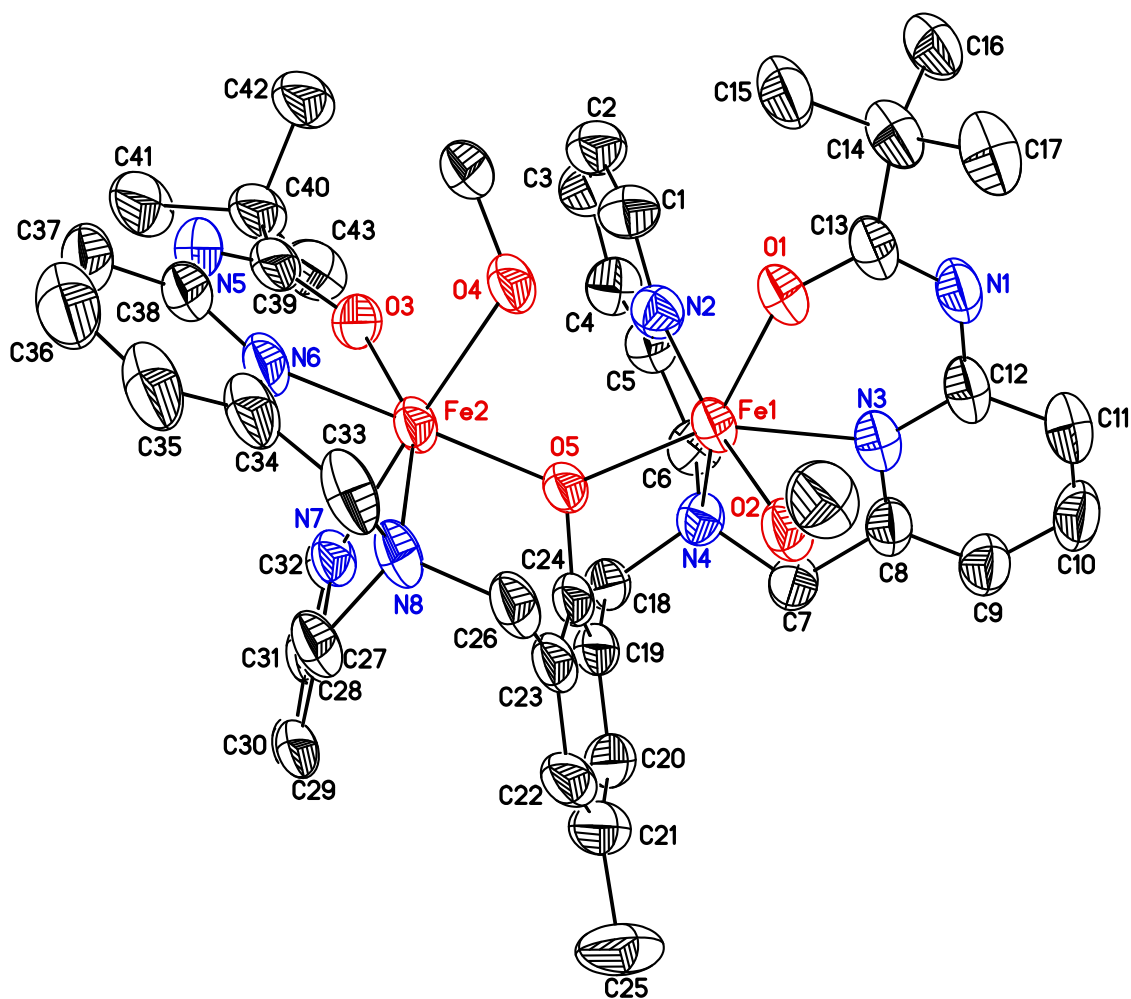

**Figure S23.** Crystal structure of complex **0** with ellipsoids drawn at 50% probability and atomic labeling scheme as indicated. Solvent molecules and hydrogen atoms are omitted for clarity.

**Table S1.** Crystal data and structure refinement for **0** (CCDC #2084746).

|                                   |                                                                                                                       |                                                             |
|-----------------------------------|-----------------------------------------------------------------------------------------------------------------------|-------------------------------------------------------------|
| Identification Code               | hd2128                                                                                                                |                                                             |
| Empirical formula                 | C <sub>98.50</sub> H <sub>128</sub> F <sub>18</sub> Fe <sub>4</sub> N <sub>16</sub> O <sub>30.50</sub> S <sub>6</sub> |                                                             |
| Formula weight                    | 2781.92                                                                                                               |                                                             |
| Temperature                       | 85(2) K                                                                                                               |                                                             |
| Wavelength                        | 1.54184 Å                                                                                                             |                                                             |
| Crystal system, space group       | Monoclinic, P2/n                                                                                                      |                                                             |
| Unit cell dimensions              | a = 25.1428(5) Å<br>b = 11.31840(10) Å<br>c = 42.5686(5) Å                                                            | alpha = 90 deg.<br>beta = 99.770(2) deg.<br>gamma = 90 deg. |
| Volume                            | 11938.3(3) Å <sup>3</sup>                                                                                             |                                                             |
| Z, Calculated density             | 4, 1.548 Mg/m <sup>3</sup>                                                                                            |                                                             |
| Absorption coefficient            | 5.755 mm <sup>-1</sup>                                                                                                |                                                             |
| F(000)                            | 5748                                                                                                                  |                                                             |
| Crystal size                      | 0.120 x 0.120 x 0.040 mm                                                                                              |                                                             |
| Theta range for data collection   | 2.219 to 69.860 deg.                                                                                                  |                                                             |
| Limiting indices                  | -30 ≤ h ≤ 29, -13 ≤ k ≤ 13, -49 ≤ l ≤ 51                                                                              |                                                             |
| Reflections collected / unique    | 181810 / 22253 [R(int) = 0.1014]                                                                                      |                                                             |
| Completeness to theta = 67.684    | 99.9 %                                                                                                                |                                                             |
| Absorption correction             | Semi-empirical from equivalents                                                                                       |                                                             |
| Max. and min. transmission        | 1.00000 and 0.51462                                                                                                   |                                                             |
| Refinement method                 | Full-matrix least-squares on F <sup>2</sup>                                                                           |                                                             |
| Data / restraints / parameters    | 22253 / 217 / 1678                                                                                                    |                                                             |
| Goodness-of-fit on F <sup>2</sup> | 1.049                                                                                                                 |                                                             |
| Final R indices [I > 2σ(I)]       | R1 = 0.0859, wR2 = 0.2388                                                                                             |                                                             |
| R indices (all data)              | R1 = 0.0973, wR2 = 0.2589                                                                                             |                                                             |
| Extinction coefficient            | 0.00032(4)                                                                                                            |                                                             |
| Largest diff. peak and hole       | 1.348 and -0.850 e x Å <sup>-3</sup>                                                                                  |                                                             |

**Table S2.** Atomic coordinates ( $\times 10^4$ ) and equivalent isotropic displacement parameters ( $\text{\AA}^2 \times 10^3$ ) for **0**. U(eq) is defined as one third of the trace of the orthogonalized Uij tensor.

|        | x        | y        | z       | U(eq)   |
|--------|----------|----------|---------|---------|
| Fe(1)  | 6646(1)  | 6460(1)  | 3623(1) | 42(1)   |
| Fe(2)  | 7294(1)  | 8303(1)  | 4332(1) | 42(1)   |
| Fe(3)  | 3500(1)  | 3616(1)  | 1217(1) | 40(1)   |
| Fe(4)  | 3802(1)  | 1841(1)  | 1974(1) | 52(1)   |
| O(1)   | 6366(1)  | 7743(3)  | 3288(1) | 48(1)   |
| O(2)   | 7341(1)  | 6383(3)  | 3369(1) | 51(1)   |
| O(3)   | 6647(1)  | 8542(3)  | 4563(1) | 48(1)   |
| O(4)   | 6877(1)  | 9351(3)  | 3930(1) | 46(1)   |
| O(5)   | 7200(1)  | 6932(3)  | 4018(1) | 40(1)   |
| O(6)   | 2678(1)  | 3781(3)  | 1214(1) | 49(1)   |
| O(7)   | 3703(2)  | 4703(3)  | 1644(1) | 59(1)   |
| O(8)   | 3938(2)  | 3205(4)  | 2310(1) | 74(1)   |
| O(9)   | 2909(3)  | 2013(10) | 1834(2) | 56(2)   |
| C(90)  | 2639(12) | 2610(40) | 2043(7) | 182(18) |
| O(9A)  | 3025(3)  | 2693(11) | 1940(3) | 79(3)   |
| C(90A) | 2545(6)  | 2270(20) | 2006(4) | 91(7)   |
| O(10)  | 3851(1)  | 2245(3)  | 1498(1) | 44(1)   |
| N(1)   | 5979(2)  | 6735(4)  | 2852(1) | 57(1)   |
| N(2)   | 5923(2)  | 6719(4)  | 3822(1) | 49(1)   |
| N(3)   | 6316(2)  | 5243(4)  | 3230(1) | 49(1)   |
| N(4)   | 6556(2)  | 4704(3)  | 3857(1) | 44(1)   |
| N(5)   | 6840(2)  | 10254(5) | 4843(1) | 68(1)   |
| N(6)   | 7568(2)  | 9989(4)  | 4564(1) | 53(1)   |
| N(7)   | 7663(2)  | 7152(4)  | 4720(1) | 44(1)   |
| N(8)   | 8165(2)  | 8409(4)  | 4288(1) | 49(1)   |
| N(9)   | 2414(2)  | 5306(4)  | 875(1)  | 49(1)   |
| N(10)  | 3370(2)  | 5288(3)  | 946(1)  | 42(1)   |
| N(11)  | 3367(2)  | 2487(3)  | 797(1)  | 42(1)   |
| N(12)  | 4256(1)  | 3894(3)  | 1026(1) | 40(1)   |
| N(13)  | 3973(2)  | 2302(5)  | 2789(1) | 68(1)   |
| N(14)  | 3631(2)  | 859(5)   | 2406(1) | 61(1)   |
| N(15)  | 4649(2)  | 1400(3)  | 2046(1) | 48(1)   |
| N(16)  | 3753(2)  | -57(4)   | 1839(1) | 52(1)   |
| C(1)   | 5652(2)  | 7748(5)  | 3821(1) | 54(1)   |
| C(2)   | 5189(2)  | 7870(5)  | 3948(1) | 60(1)   |
| C(3)   | 5008(2)  | 6925(5)  | 4099(2) | 63(1)   |
| C(4)   | 5286(2)  | 5861(5)  | 4108(1) | 59(1)   |
| C(5)   | 5731(2)  | 5776(4)  | 3958(1) | 49(1)   |

|       |         |          |         |       |
|-------|---------|----------|---------|-------|
| C(6)  | 5994(2) | 4605(4)  | 3916(1) | 52(1) |
| C(7)  | 6669(2) | 3780(4)  | 3633(1) | 50(1) |
| C(8)  | 6442(2) | 4097(5)  | 3296(1) | 50(1) |
| C(9)  | 6400(2) | 3239(5)  | 3062(1) | 61(1) |
| C(10) | 6237(3) | 3586(6)  | 2743(1) | 69(2) |
| C(11) | 6106(3) | 4740(6)  | 2677(1) | 68(2) |
| C(12) | 6140(2) | 5552(5)  | 2925(1) | 56(1) |
| C(13) | 6097(2) | 7736(5)  | 3020(1) | 51(1) |
| C(14) | 5897(2) | 8901(5)  | 2856(1) | 58(1) |
| C(15) | 6048(3) | 9925(5)  | 3079(1) | 66(1) |
| C(16) | 5275(2) | 8869(6)  | 2758(1) | 64(1) |
| C(17) | 6167(3) | 9016(6)  | 2564(1) | 72(2) |
| C(18) | 6937(2) | 4608(4)  | 4162(1) | 46(1) |
| C(19) | 7502(2) | 4956(4)  | 4122(1) | 44(1) |
| C(20) | 7920(2) | 4109(5)  | 4144(1) | 54(1) |
| C(21) | 8438(2) | 4417(6)  | 4108(1) | 63(1) |
| C(22) | 8543(2) | 5614(5)  | 4063(1) | 56(1) |
| C(23) | 8139(2) | 6475(5)  | 4036(1) | 48(1) |
| C(24) | 7611(2) | 6115(4)  | 4057(1) | 42(1) |
| C(25) | 8876(3) | 3511(7)  | 4118(2) | 88(2) |
| C(26) | 8255(2) | 7746(5)  | 4001(1) | 50(1) |
| C(27) | 8496(2) | 7905(5)  | 4581(1) | 52(1) |
| C(28) | 8205(2) | 6983(4)  | 4736(1) | 46(1) |
| C(29) | 8470(2) | 6052(5)  | 4905(1) | 50(1) |
| C(30) | 8180(2) | 5281(4)  | 5063(1) | 53(1) |
| C(31) | 7628(2) | 5449(5)  | 5049(1) | 53(1) |
| C(32) | 7388(2) | 6385(4)  | 4872(1) | 47(1) |
| C(33) | 8284(2) | 9674(5)  | 4259(1) | 64(1) |
| C(34) | 8043(2) | 10382(5) | 4495(1) | 59(1) |
| C(35) | 8292(3) | 11392(5) | 4625(1) | 73(2) |
| C(36) | 8044(3) | 12059(6) | 4825(2) | 80(2) |
| C(37) | 7566(3) | 11716(5) | 4890(1) | 75(2) |
| C(38) | 7328(2) | 10636(5) | 4760(1) | 59(1) |
| C(39) | 6524(2) | 9272(5)  | 4759(1) | 56(1) |
| C(40) | 6029(2) | 9119(6)  | 4903(1) | 67(2) |
| C(41) | 6104(3) | 9582(8)  | 5248(1) | 91(2) |
| C(42) | 5573(3) | 9830(7)  | 4694(1) | 79(2) |
| C(43) | 5877(3) | 7827(7)  | 4897(2) | 74(2) |
| C(44) | 7520(3) | 7258(7)  | 3172(2) | 76(2) |
| C(45) | 6563(2) | 10381(5) | 3971(1) | 56(1) |
| C(46) | 2901(2) | 5852(4)  | 847(1)  | 45(1) |
| C(47) | 2881(2) | 6979(4)  | 714(1)  | 53(1) |
| C(48) | 3361(2) | 7496(4)  | 670(1)  | 57(1) |
| C(49) | 3846(2) | 6911(4)  | 759(1)  | 53(1) |
| C(50) | 3839(2) | 5826(4)  | 901(1)  | 45(1) |
| C(51) | 4350(2) | 5172(4)  | 1028(1) | 45(1) |

|       |         |         |         |        |
|-------|---------|---------|---------|--------|
| C(52) | 4186(2) | 3432(4) | 694(1)  | 44(1)  |
| C(53) | 3785(2) | 2434(4) | 639(1)  | 41(1)  |
| C(54) | 3835(2) | 1533(4) | 424(1)  | 47(1)  |
| C(55) | 3431(2) | 688(4)  | 364(1)  | 50(1)  |
| C(56) | 2999(2) | 749(4)  | 523(1)  | 48(1)  |
| C(57) | 2981(2) | 1653(4) | 742(1)  | 44(1)  |
| C(58) | 2314(2) | 4353(5) | 1048(1) | 49(1)  |
| C(59) | 1723(2) | 3995(5) | 1021(1) | 56(1)  |
| C(60) | 1673(2) | 3057(6) | 1273(2) | 68(2)  |
| C(61) | 1545(2) | 3482(6) | 688(1)  | 62(1)  |
| C(62) | 1369(2) | 5059(6) | 1071(2) | 70(2)  |
| C(63) | 4708(2) | 3270(4) | 1234(1) | 44(1)  |
| C(64) | 4603(2) | 1969(4) | 1228(1) | 42(1)  |
| C(65) | 4935(2) | 1193(5) | 1092(1) | 47(1)  |
| C(66) | 4838(2) | -20(5)  | 1075(1) | 53(1)  |
| C(67) | 4398(2) | -434(4) | 1190(1) | 49(1)  |
| C(68) | 4061(2) | 296(4)  | 1331(1) | 45(1)  |
| C(69) | 4168(2) | 1504(4) | 1352(1) | 41(1)  |
| C(70) | 5227(2) | -822(6) | 941(2)  | 69(2)  |
| C(71) | 3618(2) | -210(5) | 1486(1) | 51(1)  |
| C(72) | 4293(2) | -594(5) | 1966(1) | 57(1)  |
| C(73) | 4743(2) | 293(4)  | 1961(1) | 50(1)  |
| C(74) | 5227(2) | -41(5)  | 1879(1) | 54(1)  |
| C(75) | 5625(2) | 810(5)  | 1873(1) | 58(1)  |
| C(76) | 5529(2) | 1952(5) | 1965(1) | 57(1)  |
| C(77) | 5031(2) | 2209(5) | 2050(1) | 51(1)  |
| C(78) | 3336(2) | -597(6) | 1997(1) | 66(2)  |
| C(79) | 3403(2) | -211(6) | 2340(1) | 69(2)  |
| C(80) | 3245(3) | -910(7) | 2571(2) | 81(2)  |
| C(81) | 3332(3) | -532(8) | 2882(2) | 92(2)  |
| C(82) | 3574(3) | 555(7)  | 2958(2) | 78(2)  |
| C(83) | 3716(2) | 1221(6) | 2707(1) | 65(1)  |
| C(84) | 4044(3) | 3241(5) | 2604(1) | 65(1)  |
| C(85) | 4270(3) | 4354(6) | 2777(2) | 75(2)  |
| C(86) | 4872(4) | 4225(9) | 2843(2) | 107(3) |
| C(87) | 4045(4) | 4544(8) | 3085(2) | 101(3) |
| C(88) | 4113(6) | 5396(7) | 2555(2) | 123(4) |
| C(89) | 3461(4) | 5769(7) | 1697(2) | 107(3) |
| S(3)  | 5113(1) | 6210(1) | 1900(1) | 60(1)  |
| S(4)  | 5029(1) | 1595(1) | 3585(1) | 58(1)  |
| S(5)  | 7806(1) | 1000(1) | 3404(1) | 58(1)  |
| O(17) | 4860(2) | 5072(4) | 1898(1) | 81(1)  |
| O(18) | 4793(2) | 7012(4) | 1674(1) | 81(1)  |
| O(19) | 5317(2) | 6733(4) | 2199(1) | 83(1)  |
| O(20) | 5450(2) | 2300(4) | 3492(1) | 71(1)  |
| O(21) | 5134(2) | 365(4)  | 3607(1) | 83(1)  |

|        |          |          |         |         |
|--------|----------|----------|---------|---------|
| O(22)  | 4490(2)  | 1897(4)  | 3434(1) | 67(1)   |
| O(23)  | 8357(2)  | 795(6)   | 3533(1) | 98(2)   |
| O(24)  | 7453(2)  | 96(5)    | 3480(1) | 90(2)   |
| O(25)  | 7638(3)  | 2160(5)  | 3435(1) | 108(2)  |
| O(29)  | 7825(3)  | 4418(6)  | 3221(2) | 104(2)  |
| C(93)  | 5687(3)  | 5964(9)  | 1709(2) | 89(2)   |
| C(94)  | 5036(2)  | 2046(5)  | 3998(1) | 59(1)   |
| C(95)  | 7766(3)  | 829(7)   | 2972(1) | 71(2)   |
| C(97)  | 7782(5)  | 4329(11) | 2888(3) | 120(3)  |
| O(30)  | 2500     | 5142(10) | 2500    | 161(5)  |
| C(98)  | 2956(6)  | 4450(17) | 2454(7) | 131(9)  |
| O(31)  | 2472(3)  | 7197(9)  | 3010(2) | 159(4)  |
| C(99)  | 2865(12) | 6348(15) | 2990(5) | 318(18) |
| F(1)   | 5571(2)  | 2569(5)  | 5237(1) | 68(1)   |
| F(2)   | 5302(3)  | 3623(14) | 4818(2) | 72(2)   |
| F(3)   | 5545(2)  | 4466(5)  | 5269(1) | 74(2)   |
| C(91)  | 5652(3)  | 3586(7)  | 5087(2) | 56(2)   |
| S(1)   | 6344(1)  | 3640(2)  | 5018(1) | 49(1)   |
| O(11)  | 6661(6)  | 3644(17) | 5329(4) | 64(4)   |
| O(12)  | 6385(2)  | 2592(6)  | 4837(2) | 68(2)   |
| O(13)  | 6352(3)  | 4744(5)  | 4850(2) | 65(2)   |
| F(1A)  | 5753(11) | 5145(14) | 4999(6) | 219(11) |
| F(2A)  | 5417(7)  | 3680(30) | 4733(4) | 87(6)   |
| F(3A)  | 6228(7)  | 4130(30) | 4705(4) | 219(11) |
| C(91A) | 5871(6)  | 4100(14) | 4896(4) | 103(5)  |
| S(1A)  | 6152(1)  | 3151(3)  | 5227(1) | 55(1)   |
| O(11A) | 6654(9)  | 3650(30) | 5369(8) | 63(7)   |
| O(12A) | 6188(9)  | 2044(14) | 5085(5) | 143(9)  |
| O(13A) | 5743(7)  | 3300(30) | 5416(4) | 154(10) |
| F(4)   | 3772(2)  | 8521(7)  | 3610(1) | 144(3)  |
| F(5)   | 3749(2)  | 8171(6)  | 4094(1) | 119(2)  |
| F(6)   | 3852(2)  | 9913(6)  | 3950(2) | 129(2)  |
| C(92)  | 3600(3)  | 8925(7)  | 3862(2) | 80(2)   |
| S(2)   | 2872(1)  | 9140(2)  | 3784(1) | 83(1)   |
| O(14)  | 2672(3)  | 8004(6)  | 3677(2) | 126(2)  |
| O(15)  | 2795(2)  | 10074(6) | 3543(1) | 102(2)  |
| O(16)  | 2765(3)  | 9441(6)  | 4083(1) | 103(2)  |
| F(7)   | 5559(2)  | 5525(4)  | 1420(1) | 82(1)   |
| F(8)   | 6020(2)  | 5182(8)  | 1887(1) | 156(3)  |
| F(9)   | 5976(2)  | 6913(6)  | 1699(1) | 126(2)  |
| F(10)  | 4708(2)  | 1385(4)  | 4138(1) | 81(1)   |
| F(11)  | 5534(1)  | 1960(4)  | 4166(1) | 80(1)   |
| F(12)  | 4878(2)  | 3157(3)  | 4014(1) | 71(1)   |
| F(13)  | 8101(2)  | 1507(4)  | 2857(1) | 80(1)   |
| F(14)  | 7895(3)  | -262(5)  | 2904(1) | 130(2)  |
| F(15)  | 7271(2)  | 1084(6)  | 2826(1) | 108(2)  |

|        |         |         |         |        |
|--------|---------|---------|---------|--------|
| F(16)  | 581(2)  | 8825(5) | 4799(1) | 101(2) |
| F(17)  | 370(2)  | 8519(6) | 5288(1) | 114(2) |
| F(18)  | -279(2) | 8784(5) | 4875(1) | 98(1)  |
| C(96)  | 249(2)  | 8407(5) | 4987(1) | 114(2) |
| S(6)   | 172(1)  | 6693(3) | 4876(1) | 91(1)  |
| O(26)  | -146(3) | 6325(6) | 5087(2) | 121(2) |
| O(27)  | 715(2)  | 6348(6) | 4968(2) | 119(2) |
| O(28)  | -27(3)  | 6606(6) | 4568(2) | 130(2) |
| F(16A) | -146(3) | 6325(6) | 5087(2) | 121(2) |
| F(17A) | 715(2)  | 6348(6) | 4968(2) | 119(2) |
| F(18A) | -27(3)  | 6606(6) | 4568(2) | 130(2) |
| C(96A) | 172(1)  | 6693(3) | 4876(1) | 91(1)  |
| S(6A)  | 249(2)  | 8407(5) | 4987(1) | 114(2) |
| O(26A) | 581(2)  | 8825(5) | 4799(1) | 101(2) |
| O(27A) | 370(2)  | 8519(6) | 5288(1) | 114(2) |
| O(28A) | -279(2) | 8784(5) | 4875(1) | 98(1)  |

---

**Table S3.** Bond lengths [Å] and angles [deg] for **0**.

---

|              |           |
|--------------|-----------|
| Fe(1)-O(5)   | 2.065(3)  |
| Fe(1)-O(1)   | 2.072(3)  |
| Fe(1)-N(2)   | 2.154(4)  |
| Fe(1)-O(2)   | 2.204(3)  |
| Fe(1)-N(3)   | 2.216(4)  |
| Fe(1)-N(4)   | 2.252(4)  |
| Fe(2)-O(5)   | 2.036(3)  |
| Fe(2)-O(3)   | 2.056(3)  |
| Fe(2)-N(7)   | 2.182(4)  |
| Fe(2)-O(4)   | 2.199(3)  |
| Fe(2)-N(6)   | 2.204(4)  |
| Fe(2)-N(8)   | 2.231(4)  |
| Fe(3)-O(10)  | 2.063(3)  |
| Fe(3)-O(6)   | 2.074(3)  |
| Fe(3)-N(11)  | 2.178(4)  |
| Fe(3)-O(7)   | 2.182(3)  |
| Fe(3)-N(10)  | 2.211(4)  |
| Fe(3)-N(12)  | 2.214(4)  |
| Fe(4)-O(8)   | 2.094(4)  |
| Fe(4)-O(10)  | 2.103(3)  |
| Fe(4)-N(15)  | 2.158(4)  |
| Fe(4)-O(9A)  | 2.160(9)  |
| Fe(4)-N(16)  | 2.222(5)  |
| Fe(4)-O(9)   | 2.231(7)  |
| Fe(4)-N(14)  | 2.253(4)  |
| O(1)-C(13)   | 1.224(5)  |
| O(2)-C(44)   | 1.419(8)  |
| O(2)-H(2O)   | 0.9500    |
| O(3)-C(39)   | 1.250(6)  |
| O(4)-C(45)   | 1.436(6)  |
| O(4)-H(4O)   | 0.9500    |
| O(5)-C(24)   | 1.376(5)  |
| O(6)-C(58)   | 1.238(6)  |
| O(7)-C(89)   | 1.387(8)  |
| O(7)-H(7)    | 0.9500    |
| O(8)-C(84)   | 1.234(7)  |
| O(9)-C(90)   | 1.387(17) |
| O(9)-H(9O1)  | 0.9500    |
| C(90)-H(90A) | 0.9800    |
| C(90)-H(90B) | 0.9800    |
| C(90)-H(90C) | 0.9800    |
| O(9A)-C(90A) | 1.371(15) |
| O(9A)-H(9O2) | 0.9500    |



|               |          |
|---------------|----------|
| C(90A)-H(90D) | 0.9800   |
| C(90A)-H(90E) | 0.9800   |
| C(90A)-H(90F) | 0.9800   |
| O(10)-C(69)   | 1.375(6) |
| N(1)-C(13)    | 1.345(7) |
| N(1)-C(12)    | 1.418(7) |
| N(1)-H(1A)    | 0.8800   |
| N(2)-C(5)     | 1.344(6) |
| N(2)-C(1)     | 1.348(6) |
| N(3)-C(12)    | 1.344(6) |
| N(3)-C(8)     | 1.353(7) |
| N(4)-C(7)     | 1.473(6) |
| N(4)-C(6)     | 1.480(6) |
| N(4)-C(18)    | 1.483(6) |
| N(5)-C(39)    | 1.377(8) |
| N(5)-C(38)    | 1.400(8) |
| N(5)-H(5A)    | 0.8800   |
| N(6)-C(38)    | 1.331(7) |
| N(6)-C(34)    | 1.351(8) |
| N(7)-C(32)    | 1.344(6) |
| N(7)-C(28)    | 1.366(6) |
| N(8)-C(33)    | 1.473(7) |
| N(8)-C(26)    | 1.486(6) |
| N(8)-C(27)    | 1.492(6) |
| N(9)-C(58)    | 1.354(7) |
| N(9)-C(46)    | 1.395(6) |
| N(9)-H(9A)    | 0.8800   |
| N(10)-C(46)   | 1.344(6) |
| N(10)-C(50)   | 1.371(6) |
| N(11)-C(53)   | 1.341(6) |
| N(11)-C(57)   | 1.345(6) |
| N(12)-C(51)   | 1.466(6) |
| N(12)-C(52)   | 1.488(5) |
| N(12)-C(63)   | 1.495(5) |
| N(13)-C(84)   | 1.352(8) |
| N(13)-C(83)   | 1.400(9) |
| N(13)-H(13A)  | 0.8800   |
| N(14)-C(83)   | 1.327(7) |
| N(14)-C(79)   | 1.349(8) |
| N(15)-C(77)   | 1.325(7) |
| N(15)-C(73)   | 1.336(7) |
| N(16)-C(78)   | 1.469(7) |
| N(16)-C(71)   | 1.494(6) |
| N(16)-C(72)   | 1.503(7) |
| C(1)-C(2)     | 1.372(8) |
| C(1)-H(1)     | 0.9500   |

|              |          |
|--------------|----------|
| C(2)-C(3)    | 1.365(9) |
| C(2)-H(2)    | 0.9500   |
| C(3)-C(4)    | 1.390(8) |
| C(3)-H(3)    | 0.9500   |
| C(4)-C(5)    | 1.380(8) |
| C(4)-H(4)    | 0.9500   |
| C(5)-C(6)    | 1.506(7) |
| C(6)-H(6A)   | 0.9900   |
| C(6)-H(6B)   | 0.9900   |
| C(7)-C(8)    | 1.497(7) |
| C(7)-H(7A)   | 0.9900   |
| C(7)-H(7B)   | 0.9900   |
| C(8)-C(9)    | 1.382(7) |
| C(9)-C(10)   | 1.407(9) |
| C(9)-H(9)    | 0.9500   |
| C(10)-C(11)  | 1.364(9) |
| C(10)-H(10)  | 0.9500   |
| C(11)-C(12)  | 1.391(8) |
| C(11)-H(11)  | 0.9500   |
| C(13)-C(14)  | 1.535(7) |
| C(14)-C(15)  | 1.505(8) |
| C(14)-C(17)  | 1.524(9) |
| C(14)-C(16)  | 1.550(8) |
| C(15)-H(15A) | 0.9800   |
| C(15)-H(15B) | 0.9800   |
| C(15)-H(15C) | 0.9800   |
| C(16)-H(16A) | 0.9800   |
| C(16)-H(16B) | 0.9800   |
| C(16)-H(16C) | 0.9800   |
| C(17)-H(17A) | 0.9800   |
| C(17)-H(17B) | 0.9800   |
| C(17)-H(17C) | 0.9800   |
| C(18)-C(19)  | 1.511(7) |
| C(18)-H(18A) | 0.9900   |
| C(18)-H(18B) | 0.9900   |
| C(19)-C(24)  | 1.377(7) |
| C(19)-C(20)  | 1.415(7) |
| C(20)-C(21)  | 1.380(8) |
| C(20)-H(20)  | 0.9500   |
| C(21)-C(22)  | 1.400(9) |
| C(21)-C(25)  | 1.501(8) |
| C(22)-C(23)  | 1.398(7) |
| C(22)-H(22)  | 0.9500   |
| C(23)-C(24)  | 1.406(7) |
| C(23)-C(26)  | 1.480(8) |
| C(25)-H(25A) | 0.9800   |

|              |           |
|--------------|-----------|
| C(25)-H(25B) | 0.9800    |
| C(25)-H(25C) | 0.9800    |
| C(26)-H(26A) | 0.9900    |
| C(26)-H(26B) | 0.9900    |
| C(27)-C(28)  | 1.491(7)  |
| C(27)-H(27A) | 0.9900    |
| C(27)-H(27B) | 0.9900    |
| C(28)-C(29)  | 1.380(7)  |
| C(29)-C(30)  | 1.382(8)  |
| C(29)-H(29)  | 0.9500    |
| C(30)-C(31)  | 1.393(8)  |
| C(30)-H(30)  | 0.9500    |
| C(31)-C(32)  | 1.377(7)  |
| C(31)-H(31)  | 0.9500    |
| C(32)-H(32)  | 0.9500    |
| C(33)-C(34)  | 1.492(9)  |
| C(33)-H(33A) | 0.9900    |
| C(33)-H(33B) | 0.9900    |
| C(34)-C(35)  | 1.374(8)  |
| C(35)-C(36)  | 1.366(11) |
| C(35)-H(35)  | 0.9500    |
| C(36)-C(37)  | 1.336(11) |
| C(36)-H(36)  | 0.9500    |
| C(37)-C(38)  | 1.431(8)  |
| C(37)-H(37)  | 0.9500    |
| C(39)-C(40)  | 1.489(9)  |
| C(40)-C(43)  | 1.511(10) |
| C(40)-C(41)  | 1.541(8)  |
| C(40)-C(42)  | 1.552(8)  |
| C(41)-H(41A) | 0.9800    |
| C(41)-H(41B) | 0.9800    |
| C(41)-H(41C) | 0.9800    |
| C(42)-H(42A) | 0.9800    |
| C(42)-H(42B) | 0.9800    |
| C(42)-H(42C) | 0.9800    |
| C(43)-H(43A) | 0.9800    |
| C(43)-H(43B) | 0.9800    |
| C(43)-H(43C) | 0.9800    |
| C(44)-H(44A) | 0.9800    |
| C(44)-H(44B) | 0.9800    |
| C(44)-H(44C) | 0.9800    |
| C(45)-H(45A) | 0.9800    |
| C(45)-H(45B) | 0.9800    |
| C(45)-H(45C) | 0.9800    |
| C(46)-C(47)  | 1.394(7)  |
| C(47)-C(48)  | 1.381(8)  |

|              |          |
|--------------|----------|
| C(47)-H(47)  | 0.9500   |
| C(48)-C(49)  | 1.383(8) |
| C(48)-H(48)  | 0.9500   |
| C(49)-C(50)  | 1.371(7) |
| C(49)-H(49)  | 0.9500   |
| C(50)-C(51)  | 1.503(7) |
| C(51)-H(51A) | 0.9900   |
| C(51)-H(51B) | 0.9900   |
| C(52)-C(53)  | 1.506(6) |
| C(52)-H(52A) | 0.9900   |
| C(52)-H(52B) | 0.9900   |
| C(53)-C(54)  | 1.391(6) |
| C(54)-C(55)  | 1.386(7) |
| C(54)-H(54)  | 0.9500   |
| C(55)-C(56)  | 1.376(7) |
| C(55)-H(55)  | 0.9500   |
| C(56)-C(57)  | 1.391(7) |
| C(56)-H(56)  | 0.9500   |
| C(57)-H(57)  | 0.9500   |
| C(58)-C(59)  | 1.525(7) |
| C(59)-C(61)  | 1.527(8) |
| C(59)-C(60)  | 1.530(8) |
| C(59)-C(62)  | 1.534(8) |
| C(60)-H(60A) | 0.9800   |
| C(60)-H(60B) | 0.9800   |
| C(60)-H(60C) | 0.9800   |
| C(61)-H(61A) | 0.9800   |
| C(61)-H(61B) | 0.9800   |
| C(61)-H(61C) | 0.9800   |
| C(62)-H(62A) | 0.9800   |
| C(62)-H(62B) | 0.9800   |
| C(62)-H(62C) | 0.9800   |
| C(63)-C(64)  | 1.495(7) |
| C(63)-H(63A) | 0.9900   |
| C(63)-H(63B) | 0.9900   |
| C(64)-C(69)  | 1.396(7) |
| C(64)-C(65)  | 1.403(7) |
| C(65)-C(66)  | 1.395(7) |
| C(65)-H(65)  | 0.9500   |
| C(66)-C(67)  | 1.365(8) |
| C(66)-C(70)  | 1.516(8) |
| C(67)-C(68)  | 1.391(7) |
| C(67)-H(67)  | 0.9500   |
| C(68)-C(69)  | 1.394(7) |
| C(68)-C(71)  | 1.501(7) |
| C(70)-H(70A) | 0.9800   |

|              |           |
|--------------|-----------|
| C(70)-H(70B) | 0.9800    |
| C(70)-H(70C) | 0.9800    |
| C(71)-H(71A) | 0.9900    |
| C(71)-H(71B) | 0.9900    |
| C(72)-C(73)  | 1.515(7)  |
| C(72)-H(72A) | 0.9900    |
| C(72)-H(72B) | 0.9900    |
| C(73)-C(74)  | 1.375(8)  |
| C(74)-C(75)  | 1.392(8)  |
| C(74)-H(74)  | 0.9500    |
| C(75)-C(76)  | 1.384(8)  |
| C(75)-H(75)  | 0.9500    |
| C(76)-C(77)  | 1.392(8)  |
| C(76)-H(76)  | 0.9500    |
| C(77)-H(77)  | 0.9500    |
| C(78)-C(79)  | 1.507(8)  |
| C(78)-H(78A) | 0.9900    |
| C(78)-H(78B) | 0.9900    |
| C(79)-C(80)  | 1.372(9)  |
| C(80)-C(81)  | 1.375(10) |
| C(80)-H(80)  | 0.9500    |
| C(81)-C(82)  | 1.386(11) |
| C(81)-H(81)  | 0.9500    |
| C(82)-C(83)  | 1.399(8)  |
| C(82)-H(82)  | 0.9500    |
| C(84)-C(85)  | 1.521(10) |
| C(85)-C(86)  | 1.500(12) |
| C(85)-C(88)  | 1.520(10) |
| C(85)-C(87)  | 1.529(9)  |
| C(86)-H(86A) | 0.9800    |
| C(86)-H(86B) | 0.9800    |
| C(86)-H(86C) | 0.9800    |
| C(87)-H(87A) | 0.9800    |
| C(87)-H(87B) | 0.9800    |
| C(87)-H(87C) | 0.9800    |
| C(88)-H(88A) | 0.9800    |
| C(88)-H(88B) | 0.9800    |
| C(88)-H(88C) | 0.9800    |
| C(89)-H(89A) | 0.9800    |
| C(89)-H(89B) | 0.9800    |
| C(89)-H(89C) | 0.9800    |
| S(3)-O(19)   | 1.419(4)  |
| S(3)-O(17)   | 1.436(5)  |
| S(3)-O(18)   | 1.459(5)  |
| S(3)-C(93)   | 1.796(8)  |
| S(4)-O(21)   | 1.418(4)  |

|                |           |
|----------------|-----------|
| S(4)-O(20)     | 1.435(4)  |
| S(4)-O(22)     | 1.439(4)  |
| S(4)-C(94)     | 1.826(6)  |
| S(5)-O(25)     | 1.393(6)  |
| S(5)-O(23)     | 1.419(5)  |
| S(5)-O(24)     | 1.430(5)  |
| S(5)-C(95)     | 1.836(6)  |
| O(29)-C(97)    | 1.406(12) |
| O(29)-H(29O)   | 0.92(2)   |
| C(93)-F(9)     | 1.302(10) |
| C(93)-F(7)     | 1.315(8)  |
| C(93)-F(8)     | 1.359(10) |
| C(94)-F(12)    | 1.324(7)  |
| C(94)-F(10)    | 1.328(6)  |
| C(94)-F(11)    | 1.337(6)  |
| C(95)-F(13)    | 1.295(7)  |
| C(95)-F(14)    | 1.320(9)  |
| C(95)-F(15)    | 1.327(8)  |
| C(97)-H(97A)   | 0.9800    |
| C(97)-H(97B)   | 0.9800    |
| C(97)-H(97C)   | 0.9800    |
| O(30)-C(98)    | 1.429(17) |
| O(30)-H(30A)   | 0.8400    |
| O(30)-H(30A)#1 | 0.8401    |
| C(98)-H(98A)   | 0.9800    |
| C(98)-H(98B)   | 0.9800    |
| C(98)-H(98C)   | 0.9800    |
| O(31)-C(99)    | 1.39(2)   |
| O(31)-H(31A)   | 0.8400    |
| C(99)-H(99A)   | 0.9800    |
| C(99)-H(99B)   | 0.9800    |
| C(99)-H(99C)   | 0.9800    |
| F(1)-C(91)     | 1.350(9)  |
| F(2)-C(91)     | 1.318(10) |
| F(3)-C(91)     | 1.319(9)  |
| C(91)-S(1)     | 1.815(8)  |
| S(1)-O(11)     | 1.422(12) |
| S(1)-O(12)     | 1.427(6)  |
| S(1)-O(13)     | 1.443(6)  |
| F(1A)-C(91A)   | 1.314(16) |
| F(2A)-C(91A)   | 1.322(14) |
| F(3A)-C(91A)   | 1.309(16) |
| C(91A)-S(1A)   | 1.814(12) |
| S(1A)-O(12A)   | 1.401(12) |
| S(1A)-O(13A)   | 1.420(12) |
| S(1A)-O(11A)   | 1.420(15) |

|                 |            |
|-----------------|------------|
| F(4)-C(92)      | 1.305(8)   |
| F(5)-C(92)      | 1.311(8)   |
| F(6)-C(92)      | 1.308(9)   |
| C(92)-S(2)      | 1.821(7)   |
| S(2)-O(16)      | 1.386(6)   |
| S(2)-O(14)      | 1.427(6)   |
| S(2)-O(15)      | 1.464(6)   |
| F(16)-C(96)     | 1.335(6)   |
| F(17)-C(96)     | 1.272(7)   |
| F(18)-C(96)     | 1.399(6)   |
| C(96)-S(6)      | 1.998(7)   |
| S(6)-O(28)      | 1.327(8)   |
| S(6)-O(26)      | 1.363(6)   |
| S(6)-O(27)      | 1.411(6)   |
| F(16A)-C(96A)   | 1.363(6)   |
| F(17A)-C(96A)   | 1.411(6)   |
| F(18A)-C(96A)   | 1.327(8)   |
| C(96A)-S(6A)    | 1.998(7)   |
| S(6A)-O(27A)    | 1.272(7)   |
| S(6A)-O(26A)    | 1.335(6)   |
| S(6A)-O(28A)    | 1.399(6)   |
| O(5)-Fe(1)-O(1) | 118.89(13) |
| O(5)-Fe(1)-N(2) | 98.13(14)  |
| O(1)-Fe(1)-N(2) | 87.91(15)  |
| O(5)-Fe(1)-O(2) | 85.93(12)  |
| O(1)-Fe(1)-O(2) | 84.05(13)  |
| N(2)-Fe(1)-O(2) | 171.96(14) |
| O(5)-Fe(1)-N(3) | 152.97(14) |
| O(1)-Fe(1)-N(3) | 82.90(14)  |
| N(2)-Fe(1)-N(3) | 98.50(15)  |
| O(2)-Fe(1)-N(3) | 80.40(14)  |
| O(5)-Fe(1)-N(4) | 88.40(13)  |
| O(1)-Fe(1)-N(4) | 150.98(14) |
| N(2)-Fe(1)-N(4) | 77.89(15)  |
| O(2)-Fe(1)-N(4) | 109.28(14) |
| N(3)-Fe(1)-N(4) | 74.49(14)  |
| O(5)-Fe(2)-O(3) | 113.60(13) |
| O(5)-Fe(2)-N(7) | 91.62(13)  |
| O(3)-Fe(2)-N(7) | 89.29(13)  |
| O(5)-Fe(2)-O(4) | 84.97(12)  |
| O(3)-Fe(2)-O(4) | 89.43(12)  |
| N(7)-Fe(2)-O(4) | 175.53(14) |
| O(5)-Fe(2)-N(6) | 161.16(16) |
| O(3)-Fe(2)-N(6) | 83.42(16)  |
| N(7)-Fe(2)-N(6) | 96.81(14)  |

|                   |            |
|-------------------|------------|
| O(4)-Fe(2)-N(6)   | 87.29(13)  |
| O(5)-Fe(2)-N(8)   | 89.52(14)  |
| O(3)-Fe(2)-N(8)   | 154.24(14) |
| N(7)-Fe(2)-N(8)   | 78.37(14)  |
| O(4)-Fe(2)-N(8)   | 104.45(13) |
| N(6)-Fe(2)-N(8)   | 75.82(17)  |
| O(10)-Fe(3)-O(6)  | 113.54(13) |
| O(10)-Fe(3)-N(11) | 91.41(13)  |
| O(6)-Fe(3)-N(11)  | 91.88(14)  |
| O(10)-Fe(3)-O(7)  | 85.77(13)  |
| O(6)-Fe(3)-O(7)   | 92.68(14)  |
| N(11)-Fe(3)-O(7)  | 175.31(15) |
| O(10)-Fe(3)-N(10) | 163.10(14) |
| O(6)-Fe(3)-N(10)  | 81.97(14)  |
| N(11)-Fe(3)-N(10) | 94.86(13)  |
| O(7)-Fe(3)-N(10)  | 86.85(13)  |
| O(10)-Fe(3)-N(12) | 90.62(13)  |
| O(6)-Fe(3)-N(12)  | 154.39(13) |
| N(11)-Fe(3)-N(12) | 78.59(13)  |
| O(7)-Fe(3)-N(12)  | 97.66(14)  |
| N(10)-Fe(3)-N(12) | 75.32(14)  |
| O(8)-Fe(4)-O(10)  | 117.99(14) |
| O(8)-Fe(4)-N(15)  | 91.74(17)  |
| O(10)-Fe(4)-N(15) | 88.20(13)  |
| O(8)-Fe(4)-O(9A)  | 76.0(4)    |
| O(10)-Fe(4)-O(9A) | 92.2(3)    |
| N(15)-Fe(4)-O(9A) | 166.3(4)   |
| O(8)-Fe(4)-N(16)  | 152.29(15) |
| O(10)-Fe(4)-N(16) | 88.32(14)  |
| N(15)-Fe(4)-N(16) | 79.82(15)  |
| O(9A)-Fe(4)-N(16) | 113.9(4)   |
| O(8)-Fe(4)-O(9)   | 99.2(3)    |
| O(10)-Fe(4)-O(9)  | 86.8(2)    |
| N(15)-Fe(4)-O(9)  | 169.1(3)   |
| N(16)-Fe(4)-O(9)  | 90.3(3)    |
| O(8)-Fe(4)-N(14)  | 80.62(17)  |
| O(10)-Fe(4)-N(14) | 161.03(17) |
| N(15)-Fe(4)-N(14) | 95.23(16)  |
| O(9A)-Fe(4)-N(14) | 88.9(3)    |
| N(16)-Fe(4)-N(14) | 74.01(17)  |
| O(9)-Fe(4)-N(14)  | 86.5(2)    |
| C(13)-O(1)-Fe(1)  | 135.0(3)   |
| C(44)-O(2)-Fe(1)  | 128.2(4)   |
| C(44)-O(2)-H(2O)  | 115.9      |
| Fe(1)-O(2)-H(2O)  | 115.9      |
| C(39)-O(3)-Fe(2)  | 135.2(4)   |



|                      |            |
|----------------------|------------|
| C(45)-O(4)-Fe(2)     | 122.8(3)   |
| C(45)-O(4)-H(4O)     | 118.6      |
| Fe(2)-O(4)-H(4O)     | 118.6      |
| C(24)-O(5)-Fe(2)     | 115.6(2)   |
| C(24)-O(5)-Fe(1)     | 108.2(2)   |
| Fe(2)-O(5)-Fe(1)     | 136.05(15) |
| C(58)-O(6)-Fe(3)     | 133.5(3)   |
| C(89)-O(7)-Fe(3)     | 125.3(4)   |
| C(89)-O(7)-H(7)      | 117.4      |
| Fe(3)-O(7)-H(7)      | 117.4      |
| C(84)-O(8)-Fe(4)     | 134.3(4)   |
| C(90)-O(9)-Fe(4)     | 116.8(15)  |
| C(90)-O(9)-H(9O1)    | 121.6      |
| Fe(4)-O(9)-H(9O1)    | 121.6      |
| O(9)-C(90)-H(90A)    | 109.5      |
| O(9)-C(90)-H(90B)    | 109.5      |
| H(90A)-C(90)-H(90B)  | 109.5      |
| O(9)-C(90)-H(90C)    | 109.5      |
| H(90A)-C(90)-H(90C)  | 109.5      |
| H(90B)-C(90)-H(90C)  | 109.5      |
| C(90A)-O(9A)-Fe(4)   | 130.5(12)  |
| C(90A)-O(9A)-H(9O2)  | 114.8      |
| Fe(4)-O(9A)-H(9O2)   | 114.8      |
| O(9A)-C(90A)-H(90D)  | 109.5      |
| O(9A)-C(90A)-H(90E)  | 109.5      |
| H(90D)-C(90A)-H(90E) | 109.5      |
| O(9A)-C(90A)-H(90F)  | 109.5      |
| H(90D)-C(90A)-H(90F) | 109.5      |
| H(90E)-C(90A)-H(90F) | 109.5      |
| C(69)-O(10)-Fe(3)    | 114.9(2)   |
| C(69)-O(10)-Fe(4)    | 115.9(2)   |
| Fe(3)-O(10)-Fe(4)    | 129.21(16) |
| C(13)-N(1)-C(12)     | 130.5(4)   |
| C(13)-N(1)-H(1A)     | 114.7      |
| C(12)-N(1)-H(1A)     | 114.7      |
| C(5)-N(2)-C(1)       | 118.0(4)   |
| C(5)-N(2)-Fe(1)      | 116.8(3)   |
| C(1)-N(2)-Fe(1)      | 125.2(3)   |
| C(12)-N(3)-C(8)      | 118.5(4)   |
| C(12)-N(3)-Fe(1)     | 125.9(3)   |
| C(8)-N(3)-Fe(1)      | 113.2(3)   |
| C(7)-N(4)-C(6)       | 110.4(4)   |
| C(7)-N(4)-C(18)      | 110.3(4)   |
| C(6)-N(4)-C(18)      | 109.9(4)   |
| C(7)-N(4)-Fe(1)      | 107.2(3)   |
| C(6)-N(4)-Fe(1)      | 108.2(3)   |

|                    |          |
|--------------------|----------|
| C(18)-N(4)-Fe(1)   | 110.7(3) |
| C(39)-N(5)-C(38)   | 132.4(5) |
| C(39)-N(5)-H(5A)   | 113.8    |
| C(38)-N(5)-H(5A)   | 113.8    |
| C(38)-N(6)-C(34)   | 117.9(5) |
| C(38)-N(6)-Fe(2)   | 128.1(4) |
| C(34)-N(6)-Fe(2)   | 114.1(4) |
| C(32)-N(7)-C(28)   | 118.4(4) |
| C(32)-N(7)-Fe(2)   | 124.2(3) |
| C(28)-N(7)-Fe(2)   | 114.5(3) |
| C(33)-N(8)-C(26)   | 111.2(4) |
| C(33)-N(8)-C(27)   | 110.3(4) |
| C(26)-N(8)-C(27)   | 110.7(4) |
| C(33)-N(8)-Fe(2)   | 106.1(3) |
| C(26)-N(8)-Fe(2)   | 109.4(3) |
| C(27)-N(8)-Fe(2)   | 109.0(3) |
| C(58)-N(9)-C(46)   | 130.2(4) |
| C(58)-N(9)-H(9A)   | 114.9    |
| C(46)-N(9)-H(9A)   | 114.9    |
| C(46)-N(10)-C(50)  | 118.3(4) |
| C(46)-N(10)-Fe(3)  | 128.0(3) |
| C(50)-N(10)-Fe(3)  | 113.5(3) |
| C(53)-N(11)-C(57)  | 119.0(4) |
| C(53)-N(11)-Fe(3)  | 114.4(3) |
| C(57)-N(11)-Fe(3)  | 124.1(3) |
| C(51)-N(12)-C(52)  | 110.3(3) |
| C(51)-N(12)-C(63)  | 110.8(3) |
| C(52)-N(12)-C(63)  | 110.6(3) |
| C(51)-N(12)-Fe(3)  | 106.6(3) |
| C(52)-N(12)-Fe(3)  | 109.3(3) |
| C(63)-N(12)-Fe(3)  | 109.2(3) |
| C(84)-N(13)-C(83)  | 130.1(5) |
| C(84)-N(13)-H(13A) | 115.0    |
| C(83)-N(13)-H(13A) | 115.0    |
| C(83)-N(14)-C(79)  | 118.2(5) |
| C(83)-N(14)-Fe(4)  | 127.9(4) |
| C(79)-N(14)-Fe(4)  | 113.8(4) |
| C(77)-N(15)-C(73)  | 119.4(5) |
| C(77)-N(15)-Fe(4)  | 122.5(3) |
| C(73)-N(15)-Fe(4)  | 113.3(3) |
| C(78)-N(16)-C(71)  | 110.7(4) |
| C(78)-N(16)-C(72)  | 109.8(4) |
| C(71)-N(16)-C(72)  | 110.7(4) |
| C(78)-N(16)-Fe(4)  | 107.3(4) |
| C(71)-N(16)-Fe(4)  | 111.4(3) |
| C(72)-N(16)-Fe(4)  | 106.9(3) |

|                   |          |
|-------------------|----------|
| N(2)-C(1)-C(2)    | 123.1(5) |
| N(2)-C(1)-H(1)    | 118.4    |
| C(2)-C(1)-H(1)    | 118.4    |
| C(3)-C(2)-C(1)    | 118.8(5) |
| C(3)-C(2)-H(2)    | 120.6    |
| C(1)-C(2)-H(2)    | 120.6    |
| C(2)-C(3)-C(4)    | 118.9(5) |
| C(2)-C(3)-H(3)    | 120.5    |
| C(4)-C(3)-H(3)    | 120.5    |
| C(5)-C(4)-C(3)    | 119.4(5) |
| C(5)-C(4)-H(4)    | 120.3    |
| C(3)-C(4)-H(4)    | 120.3    |
| N(2)-C(5)-C(4)    | 121.5(5) |
| N(2)-C(5)-C(6)    | 116.7(4) |
| C(4)-C(5)-C(6)    | 121.6(4) |
| N(4)-C(6)-C(5)    | 113.9(4) |
| N(4)-C(6)-H(6A)   | 108.8    |
| C(5)-C(6)-H(6A)   | 108.8    |
| N(4)-C(6)-H(6B)   | 108.8    |
| C(5)-C(6)-H(6B)   | 108.8    |
| H(6A)-C(6)-H(6B)  | 107.7    |
| N(4)-C(7)-C(8)    | 111.5(4) |
| N(4)-C(7)-H(7A)   | 109.3    |
| C(8)-C(7)-H(7A)   | 109.3    |
| N(4)-C(7)-H(7B)   | 109.3    |
| C(8)-C(7)-H(7B)   | 109.3    |
| H(7A)-C(7)-H(7B)  | 108.0    |
| N(3)-C(8)-C(9)    | 122.5(5) |
| N(3)-C(8)-C(7)    | 117.8(4) |
| C(9)-C(8)-C(7)    | 119.5(5) |
| C(8)-C(9)-C(10)   | 118.2(6) |
| C(8)-C(9)-H(9)    | 120.9    |
| C(10)-C(9)-H(9)   | 120.9    |
| C(11)-C(10)-C(9)  | 119.2(5) |
| C(11)-C(10)-H(10) | 120.4    |
| C(9)-C(10)-H(10)  | 120.4    |
| C(10)-C(11)-C(12) | 119.6(5) |
| C(10)-C(11)-H(11) | 120.2    |
| C(12)-C(11)-H(11) | 120.2    |
| N(3)-C(12)-C(11)  | 121.9(5) |
| N(3)-C(12)-N(1)   | 119.5(4) |
| C(11)-C(12)-N(1)  | 118.6(5) |
| O(1)-C(13)-N(1)   | 122.5(5) |
| O(1)-C(13)-C(14)  | 120.3(5) |
| N(1)-C(13)-C(14)  | 117.2(4) |
| C(15)-C(14)-C(17) | 110.5(5) |

|                     |          |
|---------------------|----------|
| C(15)-C(14)-C(13)   | 110.3(4) |
| C(17)-C(14)-C(13)   | 106.6(5) |
| C(15)-C(14)-C(16)   | 108.9(5) |
| C(17)-C(14)-C(16)   | 110.5(4) |
| C(13)-C(14)-C(16)   | 109.9(4) |
| C(14)-C(15)-H(15A)  | 109.5    |
| C(14)-C(15)-H(15B)  | 109.5    |
| H(15A)-C(15)-H(15B) | 109.5    |
| C(14)-C(15)-H(15C)  | 109.5    |
| H(15A)-C(15)-H(15C) | 109.5    |
| H(15B)-C(15)-H(15C) | 109.5    |
| C(14)-C(16)-H(16A)  | 109.5    |
| C(14)-C(16)-H(16B)  | 109.5    |
| H(16A)-C(16)-H(16B) | 109.5    |
| C(14)-C(16)-H(16C)  | 109.5    |
| H(16A)-C(16)-H(16C) | 109.5    |
| H(16B)-C(16)-H(16C) | 109.5    |
| C(14)-C(17)-H(17A)  | 109.5    |
| C(14)-C(17)-H(17B)  | 109.5    |
| H(17A)-C(17)-H(17B) | 109.5    |
| C(14)-C(17)-H(17C)  | 109.5    |
| H(17A)-C(17)-H(17C) | 109.5    |
| H(17B)-C(17)-H(17C) | 109.5    |
| N(4)-C(18)-C(19)    | 111.1(4) |
| N(4)-C(18)-H(18A)   | 109.4    |
| C(19)-C(18)-H(18A)  | 109.4    |
| N(4)-C(18)-H(18B)   | 109.4    |
| C(19)-C(18)-H(18B)  | 109.4    |
| H(18A)-C(18)-H(18B) | 108.0    |
| C(24)-C(19)-C(20)   | 119.2(5) |
| C(24)-C(19)-C(18)   | 119.6(4) |
| C(20)-C(19)-C(18)   | 121.2(4) |
| C(21)-C(20)-C(19)   | 121.7(5) |
| C(21)-C(20)-H(20)   | 119.2    |
| C(19)-C(20)-H(20)   | 119.2    |
| C(20)-C(21)-C(22)   | 117.7(5) |
| C(20)-C(21)-C(25)   | 121.7(6) |
| C(22)-C(21)-C(25)   | 120.6(6) |
| C(23)-C(22)-C(21)   | 122.3(5) |
| C(23)-C(22)-H(22)   | 118.9    |
| C(21)-C(22)-H(22)   | 118.9    |
| C(22)-C(23)-C(24)   | 118.2(5) |
| C(22)-C(23)-C(26)   | 122.2(5) |
| C(24)-C(23)-C(26)   | 119.5(4) |
| O(5)-C(24)-C(19)    | 119.5(4) |
| O(5)-C(24)-C(23)    | 119.7(4) |

|                     |          |
|---------------------|----------|
| C(19)-C(24)-C(23)   | 120.8(4) |
| C(21)-C(25)-H(25A)  | 109.5    |
| C(21)-C(25)-H(25B)  | 109.5    |
| H(25A)-C(25)-H(25B) | 109.5    |
| C(21)-C(25)-H(25C)  | 109.5    |
| H(25A)-C(25)-H(25C) | 109.5    |
| H(25B)-C(25)-H(25C) | 109.5    |
| C(23)-C(26)-N(8)    | 110.2(4) |
| C(23)-C(26)-H(26A)  | 109.6    |
| N(8)-C(26)-H(26A)   | 109.6    |
| C(23)-C(26)-H(26B)  | 109.6    |
| N(8)-C(26)-H(26B)   | 109.6    |
| H(26A)-C(26)-H(26B) | 108.1    |
| C(28)-C(27)-N(8)    | 113.0(4) |
| C(28)-C(27)-H(27A)  | 109.0    |
| N(8)-C(27)-H(27A)   | 109.0    |
| C(28)-C(27)-H(27B)  | 109.0    |
| N(8)-C(27)-H(27B)   | 109.0    |
| H(27A)-C(27)-H(27B) | 107.8    |
| N(7)-C(28)-C(29)    | 121.5(5) |
| N(7)-C(28)-C(27)    | 116.1(4) |
| C(29)-C(28)-C(27)   | 122.3(5) |
| C(28)-C(29)-C(30)   | 119.2(5) |
| C(28)-C(29)-H(29)   | 120.4    |
| C(30)-C(29)-H(29)   | 120.4    |
| C(29)-C(30)-C(31)   | 119.8(5) |
| C(29)-C(30)-H(30)   | 120.1    |
| C(31)-C(30)-H(30)   | 120.1    |
| C(32)-C(31)-C(30)   | 118.0(5) |
| C(32)-C(31)-H(31)   | 121.0    |
| C(30)-C(31)-H(31)   | 121.0    |
| N(7)-C(32)-C(31)    | 123.1(5) |
| N(7)-C(32)-H(32)    | 118.5    |
| C(31)-C(32)-H(32)   | 118.5    |
| N(8)-C(33)-C(34)    | 110.7(4) |
| N(8)-C(33)-H(33A)   | 109.5    |
| C(34)-C(33)-H(33A)  | 109.5    |
| N(8)-C(33)-H(33B)   | 109.5    |
| C(34)-C(33)-H(33B)  | 109.5    |
| H(33A)-C(33)-H(33B) | 108.1    |
| N(6)-C(34)-C(35)    | 123.1(6) |
| N(6)-C(34)-C(33)    | 116.4(5) |
| C(35)-C(34)-C(33)   | 120.4(6) |
| C(36)-C(35)-C(34)   | 119.0(7) |
| C(36)-C(35)-H(35)   | 120.5    |
| C(34)-C(35)-H(35)   | 120.5    |

|                     |          |
|---------------------|----------|
| C(37)-C(36)-C(35)   | 119.4(6) |
| C(37)-C(36)-H(36)   | 120.3    |
| C(35)-C(36)-H(36)   | 120.3    |
| C(36)-C(37)-C(38)   | 120.0(6) |
| C(36)-C(37)-H(37)   | 120.0    |
| C(38)-C(37)-H(37)   | 120.0    |
| N(6)-C(38)-N(5)     | 119.9(5) |
| N(6)-C(38)-C(37)    | 120.5(6) |
| N(5)-C(38)-C(37)    | 119.6(6) |
| O(3)-C(39)-N(5)     | 120.8(5) |
| O(3)-C(39)-C(40)    | 121.1(5) |
| N(5)-C(39)-C(40)    | 118.2(5) |
| C(39)-C(40)-C(43)   | 109.4(5) |
| C(39)-C(40)-C(41)   | 112.2(6) |
| C(43)-C(40)-C(41)   | 109.6(6) |
| C(39)-C(40)-C(42)   | 106.9(5) |
| C(43)-C(40)-C(42)   | 109.4(6) |
| C(41)-C(40)-C(42)   | 109.3(5) |
| C(40)-C(41)-H(41A)  | 109.5    |
| C(40)-C(41)-H(41B)  | 109.5    |
| H(41A)-C(41)-H(41B) | 109.5    |
| C(40)-C(41)-H(41C)  | 109.5    |
| H(41A)-C(41)-H(41C) | 109.5    |
| H(41B)-C(41)-H(41C) | 109.5    |
| C(40)-C(42)-H(42A)  | 109.5    |
| C(40)-C(42)-H(42B)  | 109.5    |
| H(42A)-C(42)-H(42B) | 109.5    |
| C(40)-C(42)-H(42C)  | 109.5    |
| H(42A)-C(42)-H(42C) | 109.5    |
| H(42B)-C(42)-H(42C) | 109.5    |
| C(40)-C(43)-H(43A)  | 109.5    |
| C(40)-C(43)-H(43B)  | 109.5    |
| H(43A)-C(43)-H(43B) | 109.5    |
| C(40)-C(43)-H(43C)  | 109.5    |
| H(43A)-C(43)-H(43C) | 109.5    |
| H(43B)-C(43)-H(43C) | 109.5    |
| O(2)-C(44)-H(44A)   | 109.5    |
| O(2)-C(44)-H(44B)   | 109.5    |
| H(44A)-C(44)-H(44B) | 109.5    |
| O(2)-C(44)-H(44C)   | 109.5    |
| H(44A)-C(44)-H(44C) | 109.5    |
| H(44B)-C(44)-H(44C) | 109.5    |
| O(4)-C(45)-H(45A)   | 109.5    |
| O(4)-C(45)-H(45B)   | 109.5    |
| H(45A)-C(45)-H(45B) | 109.5    |
| O(4)-C(45)-H(45C)   | 109.5    |

|                     |          |
|---------------------|----------|
| H(45A)-C(45)-H(45C) | 109.5    |
| H(45B)-C(45)-H(45C) | 109.5    |
| N(10)-C(46)-C(47)   | 122.1(5) |
| N(10)-C(46)-N(9)    | 119.9(4) |
| C(47)-C(46)-N(9)    | 118.0(4) |
| C(48)-C(47)-C(46)   | 118.1(5) |
| C(48)-C(47)-H(47)   | 121.0    |
| C(46)-C(47)-H(47)   | 121.0    |
| C(47)-C(48)-C(49)   | 120.7(5) |
| C(47)-C(48)-H(48)   | 119.6    |
| C(49)-C(48)-H(48)   | 119.6    |
| C(50)-C(49)-C(48)   | 118.2(5) |
| C(50)-C(49)-H(49)   | 120.9    |
| C(48)-C(49)-H(49)   | 120.9    |
| N(10)-C(50)-C(49)   | 122.5(4) |
| N(10)-C(50)-C(51)   | 115.7(4) |
| C(49)-C(50)-C(51)   | 121.8(4) |
| N(12)-C(51)-C(50)   | 110.8(4) |
| N(12)-C(51)-H(51A)  | 109.5    |
| C(50)-C(51)-H(51A)  | 109.5    |
| N(12)-C(51)-H(51B)  | 109.5    |
| C(50)-C(51)-H(51B)  | 109.5    |
| H(51A)-C(51)-H(51B) | 108.1    |
| N(12)-C(52)-C(53)   | 112.1(4) |
| N(12)-C(52)-H(52A)  | 109.2    |
| C(53)-C(52)-H(52A)  | 109.2    |
| N(12)-C(52)-H(52B)  | 109.2    |
| C(53)-C(52)-H(52B)  | 109.2    |
| H(52A)-C(52)-H(52B) | 107.9    |
| N(11)-C(53)-C(54)   | 122.0(4) |
| N(11)-C(53)-C(52)   | 116.8(4) |
| C(54)-C(53)-C(52)   | 121.1(4) |
| C(55)-C(54)-C(53)   | 118.8(5) |
| C(55)-C(54)-H(54)   | 120.6    |
| C(53)-C(54)-H(54)   | 120.6    |
| C(56)-C(55)-C(54)   | 119.4(4) |
| C(56)-C(55)-H(55)   | 120.3    |
| C(54)-C(55)-H(55)   | 120.3    |
| C(55)-C(56)-C(57)   | 119.0(4) |
| C(55)-C(56)-H(56)   | 120.5    |
| C(57)-C(56)-H(56)   | 120.5    |
| N(11)-C(57)-C(56)   | 121.9(5) |
| N(11)-C(57)-H(57)   | 119.0    |
| C(56)-C(57)-H(57)   | 119.0    |
| O(6)-C(58)-N(9)     | 122.7(5) |
| O(6)-C(58)-C(59)    | 121.3(5) |

|                     |          |
|---------------------|----------|
| N(9)-C(58)-C(59)    | 115.9(4) |
| C(58)-C(59)-C(61)   | 107.5(4) |
| C(58)-C(59)-C(60)   | 109.0(4) |
| C(61)-C(59)-C(60)   | 109.9(5) |
| C(58)-C(59)-C(62)   | 111.2(5) |
| C(61)-C(59)-C(62)   | 110.0(5) |
| C(60)-C(59)-C(62)   | 109.1(5) |
| C(59)-C(60)-H(60A)  | 109.5    |
| C(59)-C(60)-H(60B)  | 109.5    |
| H(60A)-C(60)-H(60B) | 109.5    |
| C(59)-C(60)-H(60C)  | 109.5    |
| H(60A)-C(60)-H(60C) | 109.5    |
| H(60B)-C(60)-H(60C) | 109.5    |
| C(59)-C(61)-H(61A)  | 109.5    |
| C(59)-C(61)-H(61B)  | 109.5    |
| H(61A)-C(61)-H(61B) | 109.5    |
| C(59)-C(61)-H(61C)  | 109.5    |
| H(61A)-C(61)-H(61C) | 109.5    |
| H(61B)-C(61)-H(61C) | 109.5    |
| C(59)-C(62)-H(62A)  | 109.5    |
| C(59)-C(62)-H(62B)  | 109.5    |
| H(62A)-C(62)-H(62B) | 109.5    |
| C(59)-C(62)-H(62C)  | 109.5    |
| H(62A)-C(62)-H(62C) | 109.5    |
| H(62B)-C(62)-H(62C) | 109.5    |
| C(64)-C(63)-N(12)   | 109.9(3) |
| C(64)-C(63)-H(63A)  | 109.7    |
| N(12)-C(63)-H(63A)  | 109.7    |
| C(64)-C(63)-H(63B)  | 109.7    |
| N(12)-C(63)-H(63B)  | 109.7    |
| H(63A)-C(63)-H(63B) | 108.2    |
| C(69)-C(64)-C(65)   | 118.7(4) |
| C(69)-C(64)-C(63)   | 120.8(4) |
| C(65)-C(64)-C(63)   | 120.5(4) |
| C(66)-C(65)-C(64)   | 121.7(5) |
| C(66)-C(65)-H(65)   | 119.1    |
| C(64)-C(65)-H(65)   | 119.1    |
| C(67)-C(66)-C(65)   | 117.7(5) |
| C(67)-C(66)-C(70)   | 122.9(5) |
| C(65)-C(66)-C(70)   | 119.3(5) |
| C(66)-C(67)-C(68)   | 122.8(5) |
| C(66)-C(67)-H(67)   | 118.6    |
| C(68)-C(67)-H(67)   | 118.6    |
| C(67)-C(68)-C(69)   | 119.0(5) |
| C(67)-C(68)-C(71)   | 121.1(5) |
| C(69)-C(68)-C(71)   | 119.7(4) |



|                     |          |
|---------------------|----------|
| O(10)-C(69)-C(68)   | 120.4(4) |
| O(10)-C(69)-C(64)   | 119.5(4) |
| C(68)-C(69)-C(64)   | 120.1(4) |
| C(66)-C(70)-H(70A)  | 109.5    |
| C(66)-C(70)-H(70B)  | 109.5    |
| H(70A)-C(70)-H(70B) | 109.5    |
| C(66)-C(70)-H(70C)  | 109.5    |
| H(70A)-C(70)-H(70C) | 109.5    |
| H(70B)-C(70)-H(70C) | 109.5    |
| N(16)-C(71)-C(68)   | 109.8(4) |
| N(16)-C(71)-H(71A)  | 109.7    |
| C(68)-C(71)-H(71A)  | 109.7    |
| N(16)-C(71)-H(71B)  | 109.7    |
| C(68)-C(71)-H(71B)  | 109.7    |
| H(71A)-C(71)-H(71B) | 108.2    |
| N(16)-C(72)-C(73)   | 111.1(4) |
| N(16)-C(72)-H(72A)  | 109.4    |
| C(73)-C(72)-H(72A)  | 109.4    |
| N(16)-C(72)-H(72B)  | 109.4    |
| C(73)-C(72)-H(72B)  | 109.4    |
| H(72A)-C(72)-H(72B) | 108.0    |
| N(15)-C(73)-C(74)   | 122.1(5) |
| N(15)-C(73)-C(72)   | 116.7(5) |
| C(74)-C(73)-C(72)   | 121.1(5) |
| C(73)-C(74)-C(75)   | 119.0(5) |
| C(73)-C(74)-H(74)   | 120.5    |
| C(75)-C(74)-H(74)   | 120.5    |
| C(76)-C(75)-C(74)   | 118.7(5) |
| C(76)-C(75)-H(75)   | 120.7    |
| C(74)-C(75)-H(75)   | 120.7    |
| C(75)-C(76)-C(77)   | 118.5(5) |
| C(75)-C(76)-H(76)   | 120.7    |
| C(77)-C(76)-H(76)   | 120.7    |
| N(15)-C(77)-C(76)   | 122.3(5) |
| N(15)-C(77)-H(77)   | 118.9    |
| C(76)-C(77)-H(77)   | 118.9    |
| N(16)-C(78)-C(79)   | 110.6(5) |
| N(16)-C(78)-H(78A)  | 109.5    |
| C(79)-C(78)-H(78A)  | 109.5    |
| N(16)-C(78)-H(78B)  | 109.5    |
| C(79)-C(78)-H(78B)  | 109.5    |
| H(78A)-C(78)-H(78B) | 108.1    |
| N(14)-C(79)-C(80)   | 122.1(6) |
| N(14)-C(79)-C(78)   | 116.0(5) |
| C(80)-C(79)-C(78)   | 121.9(6) |
| C(79)-C(80)-C(81)   | 119.5(7) |

|                     |          |
|---------------------|----------|
| C(79)-C(80)-H(80)   | 120.2    |
| C(81)-C(80)-H(80)   | 120.2    |
| C(80)-C(81)-C(82)   | 119.4(6) |
| C(80)-C(81)-H(81)   | 120.3    |
| C(82)-C(81)-H(81)   | 120.3    |
| C(81)-C(82)-C(83)   | 117.4(6) |
| C(81)-C(82)-H(82)   | 121.3    |
| C(83)-C(82)-H(82)   | 121.3    |
| N(14)-C(83)-C(82)   | 123.2(6) |
| N(14)-C(83)-N(13)   | 120.0(5) |
| C(82)-C(83)-N(13)   | 116.7(5) |
| O(8)-C(84)-N(13)    | 122.5(6) |
| O(8)-C(84)-C(85)    | 121.1(5) |
| N(13)-C(84)-C(85)   | 116.4(5) |
| C(86)-C(85)-C(88)   | 109.8(8) |
| C(86)-C(85)-C(84)   | 107.0(6) |
| C(88)-C(85)-C(84)   | 107.8(6) |
| C(86)-C(85)-C(87)   | 111.3(7) |
| C(88)-C(85)-C(87)   | 109.2(6) |
| C(84)-C(85)-C(87)   | 111.7(6) |
| C(85)-C(86)-H(86A)  | 109.5    |
| C(85)-C(86)-H(86B)  | 109.5    |
| H(86A)-C(86)-H(86B) | 109.5    |
| C(85)-C(86)-H(86C)  | 109.5    |
| H(86A)-C(86)-H(86C) | 109.5    |
| H(86B)-C(86)-H(86C) | 109.5    |
| C(85)-C(87)-H(87A)  | 109.5    |
| C(85)-C(87)-H(87B)  | 109.5    |
| H(87A)-C(87)-H(87B) | 109.5    |
| C(85)-C(87)-H(87C)  | 109.5    |
| H(87A)-C(87)-H(87C) | 109.5    |
| H(87B)-C(87)-H(87C) | 109.5    |
| C(85)-C(88)-H(88A)  | 109.5    |
| C(85)-C(88)-H(88B)  | 109.5    |
| H(88A)-C(88)-H(88B) | 109.5    |
| C(85)-C(88)-H(88C)  | 109.5    |
| H(88A)-C(88)-H(88C) | 109.5    |
| H(88B)-C(88)-H(88C) | 109.5    |
| O(7)-C(89)-H(89A)   | 109.5    |
| O(7)-C(89)-H(89B)   | 109.5    |
| H(89A)-C(89)-H(89B) | 109.5    |
| O(7)-C(89)-H(89C)   | 109.5    |
| H(89A)-C(89)-H(89C) | 109.5    |
| H(89B)-C(89)-H(89C) | 109.5    |
| O(19)-S(3)-O(17)    | 118.0(3) |
| O(19)-S(3)-O(18)    | 114.0(3) |

|                       |          |
|-----------------------|----------|
| O(17)-S(3)-O(18)      | 111.2(3) |
| O(19)-S(3)-C(93)      | 105.9(3) |
| O(17)-S(3)-C(93)      | 104.4(4) |
| O(18)-S(3)-C(93)      | 101.2(4) |
| O(21)-S(4)-O(20)      | 115.2(3) |
| O(21)-S(4)-O(22)      | 114.5(3) |
| O(20)-S(4)-O(22)      | 115.3(3) |
| O(21)-S(4)-C(94)      | 103.9(3) |
| O(20)-S(4)-C(94)      | 102.9(2) |
| O(22)-S(4)-C(94)      | 102.6(3) |
| O(25)-S(5)-O(23)      | 114.2(4) |
| O(25)-S(5)-O(24)      | 116.3(4) |
| O(23)-S(5)-O(24)      | 113.5(3) |
| O(25)-S(5)-C(95)      | 103.2(3) |
| O(23)-S(5)-C(95)      | 104.7(3) |
| O(24)-S(5)-C(95)      | 102.8(3) |
| C(97)-O(29)-H(29O)    | 122(3)   |
| F(9)-C(93)-F(7)       | 109.4(7) |
| F(9)-C(93)-F(8)       | 105.1(7) |
| F(7)-C(93)-F(8)       | 107.8(7) |
| F(9)-C(93)-S(3)       | 112.5(7) |
| F(7)-C(93)-S(3)       | 113.2(5) |
| F(8)-C(93)-S(3)       | 108.3(6) |
| F(12)-C(94)-F(10)     | 107.3(5) |
| F(12)-C(94)-F(11)     | 107.7(5) |
| F(10)-C(94)-F(11)     | 108.4(4) |
| F(12)-C(94)-S(4)      | 111.2(4) |
| F(10)-C(94)-S(4)      | 111.6(4) |
| F(11)-C(94)-S(4)      | 110.4(4) |
| F(13)-C(95)-F(14)     | 105.9(6) |
| F(13)-C(95)-F(15)     | 108.3(5) |
| F(14)-C(95)-F(15)     | 110.3(6) |
| F(13)-C(95)-S(5)      | 112.8(4) |
| F(14)-C(95)-S(5)      | 110.0(5) |
| F(15)-C(95)-S(5)      | 109.5(5) |
| O(29)-C(97)-H(97A)    | 109.5    |
| O(29)-C(97)-H(97B)    | 109.5    |
| H(97A)-C(97)-H(97B)   | 109.5    |
| O(29)-C(97)-H(97C)    | 109.5    |
| H(97A)-C(97)-H(97C)   | 109.5    |
| H(97B)-C(97)-H(97C)   | 109.5    |
| C(98)-O(30)-H(30A)    | 109.5    |
| C(98)-O(30)-H(30A)#1  | 130.4(7) |
| H(30A)-O(30)-H(30A)#1 | 53.0     |
| O(30)-C(98)-H(98A)    | 109.5    |
| O(30)-C(98)-H(98B)    | 109.5    |

|                     |           |
|---------------------|-----------|
| H(98A)-C(98)-H(98B) | 109.5     |
| O(30)-C(98)-H(98C)  | 109.5     |
| H(98A)-C(98)-H(98C) | 109.5     |
| H(98B)-C(98)-H(98C) | 109.5     |
| C(99)-O(31)-H(31A)  | 109.5     |
| O(31)-C(99)-H(99A)  | 109.5     |
| O(31)-C(99)-H(99B)  | 109.5     |
| H(99A)-C(99)-H(99B) | 109.5     |
| O(31)-C(99)-H(99C)  | 109.5     |
| H(99A)-C(99)-H(99C) | 109.5     |
| H(99B)-C(99)-H(99C) | 109.5     |
| F(2)-C(91)-F(3)     | 108.4(9)  |
| F(2)-C(91)-F(1)     | 107.9(9)  |
| F(3)-C(91)-F(1)     | 107.6(7)  |
| F(2)-C(91)-S(1)     | 112.1(7)  |
| F(3)-C(91)-S(1)     | 111.4(6)  |
| F(1)-C(91)-S(1)     | 109.3(5)  |
| O(11)-S(1)-O(12)    | 115.2(8)  |
| O(11)-S(1)-O(13)    | 114.0(8)  |
| O(12)-S(1)-O(13)    | 116.3(4)  |
| O(11)-S(1)-C(91)    | 104.6(9)  |
| O(12)-S(1)-C(91)    | 102.5(4)  |
| O(13)-S(1)-C(91)    | 101.7(4)  |
| F(3A)-C(91A)-F(1A)  | 113.6(19) |
| F(3A)-C(91A)-F(2A)  | 107.7(16) |
| F(1A)-C(91A)-F(2A)  | 106.1(18) |
| F(3A)-C(91A)-S(1A)  | 106.3(12) |
| F(1A)-C(91A)-S(1A)  | 110.7(12) |
| F(2A)-C(91A)-S(1A)  | 112.5(14) |
| O(12A)-S(1A)-O(13A) | 117.0(15) |
| O(12A)-S(1A)-O(11A) | 114.7(14) |
| O(13A)-S(1A)-O(11A) | 113.0(17) |
| O(12A)-S(1A)-C(91A) | 103.9(10) |
| O(13A)-S(1A)-C(91A) | 98.6(11)  |
| O(11A)-S(1A)-C(91A) | 107.3(14) |
| F(4)-C(92)-F(6)     | 108.8(7)  |
| F(4)-C(92)-F(5)     | 107.4(7)  |
| F(6)-C(92)-F(5)     | 106.2(6)  |
| F(4)-C(92)-S(2)     | 111.0(5)  |
| F(6)-C(92)-S(2)     | 111.1(5)  |
| F(5)-C(92)-S(2)     | 112.0(5)  |
| O(16)-S(2)-O(14)    | 113.8(4)  |
| O(16)-S(2)-O(15)    | 116.4(4)  |
| O(14)-S(2)-O(15)    | 115.3(4)  |
| O(16)-S(2)-C(92)    | 102.1(4)  |
| O(14)-S(2)-C(92)    | 103.1(4)  |

|                      |          |
|----------------------|----------|
| O(15)-S(2)-C(92)     | 103.5(3) |
| F(17)-C(96)-F(16)    | 120.1(5) |
| F(17)-C(96)-F(18)    | 111.3(5) |
| F(16)-C(96)-F(18)    | 110.0(4) |
| F(17)-C(96)-S(6)     | 109.3(4) |
| F(16)-C(96)-S(6)     | 104.5(4) |
| F(18)-C(96)-S(6)     | 99.6(4)  |
| O(28)-S(6)-O(26)     | 117.7(5) |
| O(28)-S(6)-O(27)     | 115.9(5) |
| O(26)-S(6)-O(27)     | 112.4(4) |
| O(28)-S(6)-C(96)     | 108.0(4) |
| O(26)-S(6)-C(96)     | 100.8(4) |
| O(27)-S(6)-C(96)     | 98.8(4)  |
| F(18A)-C(96A)-F(16A) | 117.7(5) |
| F(18A)-C(96A)-F(17A) | 115.9(5) |
| F(16A)-C(96A)-F(17A) | 112.4(4) |
| F(18A)-C(96A)-S(6A)  | 108.0(4) |
| F(16A)-C(96A)-S(6A)  | 100.8(4) |
| F(17A)-C(96A)-S(6A)  | 98.8(4)  |
| O(27A)-S(6A)-O(26A)  | 120.1(5) |
| O(27A)-S(6A)-O(28A)  | 111.3(5) |
| O(26A)-S(6A)-O(28A)  | 110.0(4) |
| O(27A)-S(6A)-C(96A)  | 109.3(4) |
| O(26A)-S(6A)-C(96A)  | 104.5(4) |
| O(28A)-S(6A)-C(96A)  | 99.6(4)  |

---

Symmetry transformations used to generate equivalent atoms:

#1  $-x+1/2, y, -z+1/2$

**Table S4.** Anisotropic displacement parameters ( $\text{\AA}^2 \times 10^3$ ) for **0**. The anisotropic displacement factor exponent takes the form:  $-2 \pi^2 [ h^2 a^{*2} U_{11} + \dots + 2 h k a^* b^* U_{12} ]$

|        | U11    | U22     | U33     | U23     | U13    | U12     |
|--------|--------|---------|---------|---------|--------|---------|
| Fe(1)  | 40(1)  | 53(1)   | 29(1)   | 1(1)    | 1(1)   | -3(1)   |
| Fe(2)  | 46(1)  | 53(1)   | 24(1)   | -1(1)   | 1(1)   | 1(1)    |
| Fe(3)  | 41(1)  | 52(1)   | 25(1)   | 1(1)    | 0(1)   | 1(1)    |
| Fe(4)  | 53(1)  | 70(1)   | 34(1)   | 14(1)   | 7(1)   | 7(1)    |
| O(1)   | 49(2)  | 61(2)   | 32(2)   | 6(1)    | -2(1)  | -3(1)   |
| O(2)   | 48(2)  | 71(2)   | 33(2)   | 3(1)    | 7(1)   | -1(2)   |
| O(3)   | 57(2)  | 57(2)   | 32(2)   | 1(1)    | 11(1)  | 9(1)    |
| O(4)   | 52(2)  | 59(2)   | 26(1)   | 3(1)    | 1(1)   | 3(1)    |
| O(5)   | 38(2)  | 53(2)   | 28(1)   | 0(1)    | 2(1)   | 4(1)    |
| O(6)   | 50(2)  | 60(2)   | 39(2)   | 3(1)    | 8(1)   | 2(1)    |
| O(7)   | 77(2)  | 64(2)   | 34(2)   | -5(1)   | 2(2)   | 7(2)    |
| O(8)   | 113(4) | 77(2)   | 39(2)   | 10(2)   | 29(2)  | 23(2)   |
| O(9)   | 41(4)  | 92(6)   | 36(4)   | 3(4)    | 12(3)  | 9(4)    |
| C(90)  | 97(18) | 350(40) | 104(14) | -70(20) | 21(13) | 110(20) |
| O(9A)  | 50(4)  | 101(7)  | 89(7)   | 26(6)   | 15(4)  | -2(5)   |
| C(90A) | 44(5)  | 162(16) | 60(8)   | 50(10)  | -9(5)  | -14(7)  |
| O(10)  | 43(2)  | 58(2)   | 32(1)   | 4(1)    | 5(1)   | 6(1)    |
| N(1)   | 66(3)  | 65(2)   | 34(2)   | -5(2)   | -6(2)  | -2(2)   |
| N(2)   | 42(2)  | 55(2)   | 49(2)   | -2(2)   | 4(2)   | -1(2)   |
| N(3)   | 49(2)  | 61(2)   | 35(2)   | -2(2)   | 2(2)   | -8(2)   |
| N(4)   | 49(2)  | 48(2)   | 37(2)   | 0(2)    | 12(2)  | -1(2)   |
| N(5)   | 80(3)  | 76(3)   | 42(2)   | -19(2)  | -6(2)  | 21(3)   |
| N(6)   | 69(2)  | 53(2)   | 31(2)   | -1(2)   | -13(2) | 2(2)    |
| N(7)   | 48(2)  | 60(2)   | 22(2)   | 1(2)    | 4(1)   | 2(2)    |
| N(8)   | 53(2)  | 67(2)   | 24(2)   | 4(2)    | -2(2)  | -7(2)   |
| N(9)   | 45(2)  | 62(2)   | 38(2)   | 4(2)    | 2(2)   | 7(2)    |
| N(10)  | 48(2)  | 51(2)   | 23(2)   | 2(1)    | -1(1)  | 2(2)    |
| N(11)  | 44(2)  | 52(2)   | 26(2)   | 0(1)    | -2(1)  | 1(2)    |
| N(12)  | 42(2)  | 53(2)   | 22(2)   | -1(1)   | -3(1)  | -1(2)   |
| N(13)  | 74(3)  | 86(3)   | 45(2)   | 8(2)    | 11(2)  | -5(3)   |
| N(14)  | 54(2)  | 89(3)   | 40(2)   | 17(2)   | 8(2)   | -7(2)   |
| N(15)  | 52(2)  | 58(2)   | 29(2)   | 4(2)    | -4(2)  | -1(2)   |
| N(16)  | 48(2)  | 68(2)   | 38(2)   | 9(2)    | 1(2)   | -9(2)   |
| C(1)   | 48(3)  | 52(3)   | 64(3)   | 2(2)    | 11(2)  | 3(2)    |
| C(2)   | 54(3)  | 64(3)   | 63(3)   | 1(2)    | 11(2)  | 8(2)    |
| C(3)   | 53(3)  | 77(4)   | 62(3)   | -4(3)   | 16(2)  | 6(3)    |
| C(4)   | 57(3)  | 62(3)   | 59(3)   | 0(2)    | 15(2)  | -4(2)   |
| C(5)   | 43(2)  | 58(3)   | 46(3)   | 0(2)    | 9(2)   | -6(2)   |

|       |        |        |       |        |        |        |
|-------|--------|--------|-------|--------|--------|--------|
| C(6)  | 51(3)  | 53(3)  | 55(3) | 2(2)   | 17(2)  | -6(2)  |
| C(7)  | 57(3)  | 49(2)  | 45(3) | -4(2)  | 10(2)  | 0(2)   |
| C(8)  | 46(2)  | 63(3)  | 40(2) | -10(2) | 6(2)   | -6(2)  |
| C(9)  | 61(3)  | 68(3)  | 52(3) | -13(2) | 5(2)   | -3(2)  |
| C(10) | 74(4)  | 84(4)  | 48(3) | -28(3) | 5(3)   | -5(3)  |
| C(11) | 77(4)  | 83(4)  | 40(3) | -12(3) | -6(2)  | -3(3)  |
| C(12) | 58(3)  | 72(3)  | 35(2) | -6(2)  | -1(2)  | -9(2)  |
| C(13) | 50(3)  | 68(3)  | 33(2) | 0(2)   | -2(2)  | -3(2)  |
| C(14) | 60(3)  | 62(3)  | 45(3) | 7(2)   | -8(2)  | -10(2) |
| C(15) | 77(4)  | 68(3)  | 43(3) | -1(2)  | -12(3) | -6(3)  |
| C(16) | 58(3)  | 76(3)  | 50(3) | 0(3)   | -12(2) | -3(3)  |
| C(17) | 80(4)  | 84(4)  | 48(3) | 3(3)   | -2(3)  | -17(3) |
| C(18) | 55(3)  | 52(2)  | 31(2) | 4(2)   | 10(2)  | 7(2)   |
| C(19) | 49(2)  | 57(2)  | 27(2) | 2(2)   | 7(2)   | 7(2)   |
| C(20) | 64(3)  | 70(3)  | 31(2) | 6(2)   | 14(2)  | 18(2)  |
| C(21) | 63(3)  | 92(4)  | 37(2) | 16(2)  | 17(2)  | 29(3)  |
| C(22) | 42(2)  | 94(4)  | 32(2) | 6(2)   | 6(2)   | 17(2)  |
| C(23) | 42(2)  | 77(3)  | 22(2) | -1(2)  | 2(2)   | 3(2)   |
| C(24) | 42(2)  | 60(2)  | 22(2) | -2(2)  | 3(2)   | 5(2)   |
| C(25) | 70(4)  | 116(6) | 87(5) | 37(4)  | 40(4)  | 46(4)  |
| C(26) | 40(2)  | 84(3)  | 26(2) | 0(2)   | 3(2)   | -4(2)  |
| C(27) | 48(2)  | 76(3)  | 28(2) | 3(2)   | -4(2)  | -5(2)  |
| C(28) | 49(2)  | 64(3)  | 23(2) | -4(2)  | -3(2)  | 2(2)   |
| C(29) | 52(3)  | 67(3)  | 27(2) | -5(2)  | -4(2)  | 4(2)   |
| C(30) | 70(3)  | 57(3)  | 28(2) | -4(2)  | -8(2)  | 5(2)   |
| C(31) | 72(3)  | 59(3)  | 26(2) | -1(2)  | 5(2)   | -2(2)  |
| C(32) | 55(3)  | 61(3)  | 26(2) | 1(2)   | 6(2)   | 5(2)   |
| C(33) | 70(3)  | 81(4)  | 34(2) | 9(2)   | -6(2)  | -23(3) |
| C(34) | 77(3)  | 62(3)  | 32(2) | 9(2)   | -9(2)  | -9(2)  |
| C(35) | 97(4)  | 67(3)  | 46(3) | 8(2)   | -17(3) | -21(3) |
| C(36) | 112(5) | 59(3)  | 59(3) | 4(3)   | -16(3) | -15(3) |
| C(37) | 108(4) | 62(3)  | 44(3) | -12(2) | -18(3) | 16(3)  |
| C(38) | 73(3)  | 55(3)  | 41(2) | -5(2)  | -12(2) | 11(2)  |
| C(39) | 64(3)  | 74(3)  | 28(2) | 2(2)   | 0(2)   | 22(3)  |
| C(40) | 68(3)  | 96(4)  | 37(3) | 4(3)   | 8(2)   | 28(3)  |
| C(41) | 91(5)  | 148(7) | 34(3) | -2(3)  | 12(3)  | 46(5)  |
| C(42) | 73(4)  | 118(5) | 45(3) | 1(3)   | 8(3)   | 42(4)  |
| C(43) | 57(3)  | 116(5) | 50(3) | 13(3)  | 19(3)  | 17(3)  |
| C(44) | 65(4)  | 105(5) | 63(4) | 8(3)   | 20(3)  | -1(3)  |
| C(45) | 71(3)  | 57(3)  | 36(2) | 3(2)   | -5(2)  | 11(2)  |
| C(46) | 52(3)  | 53(2)  | 29(2) | 1(2)   | 2(2)   | 6(2)   |
| C(47) | 60(3)  | 55(3)  | 40(2) | 0(2)   | -1(2)  | 8(2)   |
| C(48) | 75(3)  | 49(2)  | 43(3) | 3(2)   | -2(2)  | 2(2)   |
| C(49) | 63(3)  | 55(3)  | 36(2) | -3(2)  | -2(2)  | -10(2) |
| C(50) | 55(3)  | 53(2)  | 26(2) | -2(2)  | -2(2)  | -7(2)  |
| C(51) | 48(2)  | 56(2)  | 28(2) | 1(2)   | 0(2)   | -7(2)  |

|       |         |        |        |        |        |        |
|-------|---------|--------|--------|--------|--------|--------|
| C(52) | 45(2)   | 58(2)  | 27(2)  | 0(2)   | 4(2)   | -3(2)  |
| C(53) | 44(2)   | 52(2)  | 24(2)  | 0(2)   | -2(2)  | 2(2)   |
| C(54) | 51(3)   | 60(3)  | 28(2)  | 1(2)   | 2(2)   | -1(2)  |
| C(55) | 63(3)   | 52(2)  | 30(2)  | 1(2)   | 0(2)   | 3(2)   |
| C(56) | 54(3)   | 49(2)  | 37(2)  | 0(2)   | -5(2)  | -2(2)  |
| C(57) | 39(2)   | 54(2)  | 36(2)  | -1(2)  | 0(2)   | -4(2)  |
| C(58) | 47(2)   | 63(3)  | 35(2)  | -2(2)  | 1(2)   | 7(2)   |
| C(59) | 42(2)   | 79(3)  | 47(3)  | 2(2)   | 6(2)   | 3(2)   |
| C(60) | 48(3)   | 98(4)  | 60(3)  | 13(3)  | 12(2)  | -3(3)  |
| C(61) | 51(3)   | 83(4)  | 51(3)  | -7(3)  | 2(2)   | -4(3)  |
| C(62) | 53(3)   | 95(4)  | 61(3)  | -7(3)  | 13(3)  | 14(3)  |
| C(63) | 39(2)   | 59(3)  | 31(2)  | 4(2)   | -1(2)  | 2(2)   |
| C(64) | 40(2)   | 56(2)  | 28(2)  | 2(2)   | -2(2)  | 3(2)   |
| C(65) | 40(2)   | 67(3)  | 34(2)  | 2(2)   | 3(2)   | 2(2)   |
| C(66) | 49(3)   | 66(3)  | 41(2)  | -2(2)  | -3(2)  | 13(2)  |
| C(67) | 50(3)   | 57(3)  | 34(2)  | -3(2)  | -8(2)  | 4(2)   |
| C(68) | 43(2)   | 60(3)  | 29(2)  | 1(2)   | -5(2)  | 0(2)   |
| C(69) | 34(2)   | 59(2)  | 29(2)  | 3(2)   | -2(2)  | 5(2)   |
| C(70) | 63(3)   | 78(4)  | 65(3)  | -7(3)  | 8(3)   | 16(3)  |
| C(71) | 46(2)   | 62(3)  | 42(2)  | 2(2)   | -2(2)  | -8(2)  |
| C(72) | 60(3)   | 62(3)  | 43(3)  | 10(2)  | -6(2)  | -3(2)  |
| C(73) | 50(3)   | 61(3)  | 33(2)  | 4(2)   | -7(2)  | 0(2)   |
| C(74) | 47(3)   | 68(3)  | 44(3)  | -1(2)  | -5(2)  | 3(2)   |
| C(75) | 47(3)   | 84(4)  | 41(3)  | 1(2)   | 0(2)   | 2(2)   |
| C(76) | 52(3)   | 75(3)  | 41(2)  | -1(2)  | -1(2)  | -11(2) |
| C(77) | 64(3)   | 57(3)  | 31(2)  | 1(2)   | 6(2)   | -4(2)  |
| C(78) | 57(3)   | 91(4)  | 46(3)  | 17(3)  | -1(2)  | -16(3) |
| C(79) | 63(3)   | 98(4)  | 42(3)  | 15(3)  | -2(2)  | -17(3) |
| C(80) | 79(4)   | 112(5) | 50(3)  | 16(3)  | 4(3)   | -22(4) |
| C(81) | 102(5)  | 125(6) | 50(3)  | 21(4)  | 11(3)  | -33(5) |
| C(82) | 77(4)   | 110(5) | 47(3)  | 14(3)  | 10(3)  | -15(4) |
| C(83) | 60(3)   | 98(4)  | 38(3)  | 12(3)  | 11(2)  | -2(3)  |
| C(84) | 77(4)   | 75(3)  | 47(3)  | 7(2)   | 25(3)  | 10(3)  |
| C(85) | 105(5)  | 75(4)  | 54(3)  | 3(3)   | 39(3)  | 5(3)   |
| C(86) | 108(6)  | 111(6) | 108(7) | -20(5) | 40(5)  | -28(5) |
| C(87) | 157(8)  | 93(5)  | 66(4)  | 1(4)   | 53(5)  | 6(5)   |
| C(88) | 244(13) | 75(4)  | 61(4)  | 5(3)   | 60(6)  | 15(6)  |
| C(89) | 147(8)  | 88(5)  | 77(5)  | -24(4) | -5(5)  | 33(5)  |
| S(3)  | 73(1)   | 68(1)  | 38(1)  | -10(1) | 1(1)   | -1(1)  |
| S(4)  | 55(1)   | 60(1)  | 59(1)  | -4(1)  | 12(1)  | -4(1)  |
| S(5)  | 60(1)   | 78(1)  | 37(1)  | 3(1)   | 12(1)  | 6(1)   |
| O(17) | 122(4)  | 64(2)  | 58(2)  | -1(2)  | 21(2)  | -3(2)  |
| O(18) | 95(3)   | 77(3)  | 62(3)  | 1(2)   | -10(2) | 5(2)   |
| O(19) | 96(3)   | 105(3) | 40(2)  | -20(2) | -12(2) | 0(3)   |
| O(20) | 68(2)   | 76(2)  | 75(3)  | -17(2) | 32(2)  | -22(2) |
| O(21) | 87(3)   | 53(2)  | 110(4) | -8(2)  | 22(3)  | -2(2)  |



|        |         |         |         |         |          |          |
|--------|---------|---------|---------|---------|----------|----------|
| O(22)  | 55(2)   | 93(3)   | 52(2)   | 6(2)    | 5(2)     | 2(2)     |
| O(23)  | 62(3)   | 183(6)  | 49(2)   | 32(3)   | 6(2)     | 15(3)    |
| O(24)  | 87(3)   | 136(4)  | 48(2)   | 9(2)    | 15(2)    | -34(3)   |
| O(25)  | 154(6)  | 96(4)   | 79(3)   | -5(3)   | 32(3)    | 38(4)    |
| O(29)  | 119(4)  | 111(4)  | 92(4)   | 0(3)    | 49(3)    | 16(4)    |
| C(93)  | 67(4)   | 137(7)  | 60(4)   | -11(4)  | -3(3)    | -20(4)   |
| C(94)  | 51(3)   | 67(3)   | 57(3)   | 9(2)    | 6(2)     | -5(2)    |
| C(95)  | 66(4)   | 101(5)  | 46(3)   | 2(3)    | 5(3)     | -12(3)   |
| C(97)  | 123(8)  | 136(8)  | 106(7)  | -20(6)  | 33(6)    | -12(6)   |
| O(30)  | 61(5)   | 127(8)  | 309(18) | 0       | 68(7)    | 0        |
| C(98)  | 48(7)   | 106(12) | 240(30) | -62(15) | 10(11)   | -7(8)    |
| O(31)  | 105(5)  | 199(8)  | 184(8)  | 77(7)   | 55(5)    | 59(5)    |
| C(99)  | 600(50) | 147(13) | 175(16) | 39(12)  | -20(20)  | 200(20)  |
| F(1)   | 66(3)   | 79(3)   | 63(3)   | 12(2)   | 20(2)    | -9(2)    |
| F(2)   | 46(3)   | 106(5)  | 59(5)   | 9(4)    | -2(3)    | 3(3)     |
| F(3)   | 65(3)   | 91(4)   | 67(3)   | -6(3)   | 17(3)    | 20(3)    |
| C(91)  | 49(4)   | 70(4)   | 48(4)   | 6(3)    | 5(3)     | 5(3)     |
| S(1)   | 42(1)   | 60(1)   | 42(1)   | -2(1)   | 4(1)     | 2(1)     |
| O(11)  | 54(6)   | 92(10)  | 40(5)   | -6(5)   | -4(4)    | -16(6)   |
| O(12)  | 57(3)   | 66(3)   | 78(4)   | -26(3)  | 2(3)     | 6(3)     |
| O(13)  | 81(5)   | 59(3)   | 57(4)   | 5(3)    | 17(3)    | -8(3)    |
| F(1A)  | 270(20) | 96(9)   | 220(20) | -1(11)  | -161(16) | 18(12)   |
| F(2A)  | 69(9)   | 122(11) | 59(10)  | 3(9)    | -20(8)   | -9(9)    |
| F(3A)  | 118(12) | 430(30) | 95(13)  | 103(16) | -27(8)   | -103(16) |
| C(91A) | 89(11)  | 106(9)  | 94(11)  | 38(10)  | -45(7)   | -41(9)   |
| S(1A)  | 50(2)   | 69(2)   | 45(2)   | 1(2)    | 6(1)     | -1(2)    |
| O(11A) | 62(11)  | 71(13)  | 50(12)  | 14(9)   | -7(8)    | 4(10)    |
| O(12A) | 146(16) | 99(10)  | 152(17) | -51(11) | -64(14)  | 44(11)   |
| O(13A) | 82(10)  | 330(30) | 63(9)   | -26(14) | 41(8)    | -26(14)  |
| F(4)   | 82(3)   | 291(9)  | 63(3)   | -7(4)   | 22(2)    | 30(4)    |
| F(5)   | 105(4)  | 167(5)  | 87(3)   | 26(3)   | 20(3)    | 42(3)    |
| F(6)   | 79(3)   | 155(5)  | 142(5)  | 14(4)   | -11(3)   | -29(3)   |
| C(92)  | 66(4)   | 118(6)  | 56(4)   | 0(4)    | 9(3)     | -7(4)    |
| S(2)   | 61(1)   | 120(1)  | 70(1)   | -15(1)  | 16(1)    | -8(1)    |
| O(14)  | 99(4)   | 131(5)  | 148(6)  | -49(5)  | 20(4)    | -30(4)   |
| O(15)  | 74(3)   | 164(5)  | 63(3)   | 7(3)    | -2(2)    | -2(3)    |
| O(16)  | 113(4)  | 123(4)  | 78(3)   | -5(3)   | 27(3)    | -11(3)   |
| F(7)   | 68(2)   | 123(3)  | 57(2)   | -21(2)  | 16(2)    | -16(2)   |
| F(8)   | 104(4)  | 272(9)  | 86(3)   | 12(4)   | -1(3)    | 83(5)    |
| F(9)   | 93(3)   | 168(5)  | 121(4)  | -41(4)  | 27(3)    | -67(3)   |
| F(10)  | 75(2)   | 106(3)  | 60(2)   | 15(2)   | 10(2)    | -26(2)   |
| F(11)  | 62(2)   | 102(3)  | 69(2)   | 14(2)   | -11(2)   | -10(2)   |
| F(12)  | 74(2)   | 79(2)   | 61(2)   | -14(2)  | 17(2)    | -5(2)    |
| F(13)  | 70(2)   | 127(3)  | 45(2)   | 11(2)   | 11(2)    | -8(2)    |
| F(14)  | 229(7)  | 99(3)   | 82(3)   | -16(2)  | 79(4)    | -6(4)    |
| F(15)  | 63(2)   | 213(5)  | 45(2)   | 13(3)   | 1(2)     | -13(3)   |

|        |        |        |        |        |       |        |
|--------|--------|--------|--------|--------|-------|--------|
| F(16)  | 90(3)  | 136(4) | 78(3)  | 4(3)   | 18(2) | -13(3) |
| F(17)  | 110(4) | 159(5) | 71(3)  | -1(3)  | 6(3)  | 3(3)   |
| F(18)  | 74(3)  | 148(4) | 68(3)  | -9(3)  | 2(2)  | 3(3)   |
| C(96)  | 84(2)  | 184(5) | 73(2)  | 15(2)  | 14(2) | 7(2)   |
| S(6)   | 76(2)  | 135(3) | 66(2)  | 19(2)  | 23(1) | 18(2)  |
| O(26)  | 124(5) | 159(5) | 91(4)  | 1(3)   | 46(3) | -9(4)  |
| O(27)  | 87(4)  | 155(5) | 120(5) | 30(4)  | 31(3) | 25(3)  |
| O(28)  | 131(5) | 159(6) | 110(5) | -20(4) | 51(4) | -7(4)  |
| F(16A) | 124(5) | 159(5) | 91(4)  | 1(3)   | 46(3) | -9(4)  |
| F(17A) | 87(4)  | 155(5) | 120(5) | 30(4)  | 31(3) | 25(3)  |
| F(18A) | 131(5) | 159(6) | 110(5) | -20(4) | 51(4) | -7(4)  |
| C(96A) | 76(2)  | 135(3) | 66(2)  | 19(2)  | 23(1) | 18(2)  |
| S(6A)  | 84(2)  | 184(5) | 73(2)  | 15(2)  | 14(2) | 7(2)   |
| O(26A) | 90(3)  | 136(4) | 78(3)  | 4(3)   | 18(2) | -13(3) |
| O(27A) | 110(4) | 159(5) | 71(3)  | -1(3)  | 6(3)  | 3(3)   |
| O(28A) | 74(3)  | 148(4) | 68(3)  | -9(3)  | 2(2)  | 3(3)   |

---

**Table S5.** Hydrogen coordinates ( $\times 10^4$ ) and isotropic displacement parameters ( $\text{\AA}^2 \times 10^3$ ) for **0**.

|        | x    | y     | z    | U(eq) |
|--------|------|-------|------|-------|
| H(2O)  | 7547 | 5675  | 3395 | 61    |
| H(4O)  | 6907 | 9112  | 3719 | 55    |
| H(7)   | 3980 | 4424  | 1807 | 71    |
| H(9O1) | 2723 | 1692  | 1639 | 67    |
| H(90A) | 2252 | 2632  | 1957 | 274   |
| H(90B) | 2697 | 2206  | 2250 | 274   |
| H(90C) | 2777 | 3421  | 2072 | 274   |
| H(9O2) | 3015 | 3488  | 1867 | 95    |
| H(90D) | 2270 | 2894  | 1964 | 136   |
| H(90E) | 2431 | 1589  | 1870 | 136   |
| H(90F) | 2590 | 2037  | 2230 | 136   |
| H(1A)  | 5767 | 6830  | 2667 | 68    |
| H(5A)  | 6710 | 10735 | 4974 | 81    |
| H(9A)  | 2126 | 5632  | 762  | 59    |
| H(13A) | 4111 | 2382  | 2992 | 82    |
| H(1)   | 5789 | 8421  | 3727 | 65    |
| H(2)   | 4999 | 8598  | 3932 | 72    |
| H(3)   | 4696 | 6993  | 4196 | 76    |
| H(4)   | 5172 | 5198  | 4216 | 70    |
| H(6A)  | 5992 | 4121  | 4109 | 62    |
| H(6B)  | 5776 | 4184  | 3734 | 62    |
| H(7A)  | 6509 | 3024  | 3688 | 60    |
| H(7B)  | 7064 | 3669  | 3655 | 60    |
| H(9)   | 6480 | 2436  | 3116 | 73    |
| H(10)  | 6217 | 3024  | 2576 | 83    |
| H(11)  | 5993 | 4988  | 2463 | 82    |
| H(15A) | 5927 | 10664 | 2970 | 98    |
| H(15B) | 6441 | 9944  | 3146 | 98    |
| H(15C) | 5874 | 9832  | 3267 | 98    |
| H(16A) | 5106 | 8852  | 2949 | 96    |
| H(16B) | 5170 | 8160  | 2630 | 96    |
| H(16C) | 5154 | 9573  | 2632 | 96    |
| H(17A) | 6110 | 9815  | 2476 | 108   |
| H(17B) | 6011 | 8439  | 2402 | 108   |
| H(17C) | 6555 | 8868  | 2624 | 108   |
| H(18A) | 6940 | 3785  | 4241 | 55    |
| H(18B) | 6815 | 5128  | 4323 | 55    |
| H(20)  | 7843 | 3307  | 4185 | 65    |
| H(22)  | 8901 | 5849  | 4050 | 67    |

|        |      |       |      |     |
|--------|------|-------|------|-----|
| H(25A) | 9106 | 3519  | 4328 | 131 |
| H(25B) | 9095 | 3696  | 3954 | 131 |
| H(25C) | 8714 | 2726  | 4077 | 131 |
| H(26A) | 8017 | 8063  | 3810 | 61  |
| H(26B) | 8634 | 7846  | 3970 | 61  |
| H(27A) | 8829 | 7555  | 4525 | 62  |
| H(27B) | 8606 | 8551  | 4735 | 62  |
| H(29)  | 8846 | 5942  | 4912 | 60  |
| H(30)  | 8357 | 4639  | 5181 | 64  |
| H(31)  | 7423 | 4933  | 5158 | 64  |
| H(32)  | 7010 | 6495  | 4858 | 57  |
| H(33A) | 8138 | 9949  | 4041 | 76  |
| H(33B) | 8680 | 9793  | 4296 | 76  |
| H(35)  | 8632 | 11623 | 4576 | 88  |
| H(36)  | 8209 | 12761 | 4917 | 97  |
| H(37)  | 7384 | 12189 | 5023 | 90  |
| H(41A) | 6456 | 9328  | 5364 | 137 |
| H(41B) | 5818 | 9265  | 5354 | 137 |
| H(41C) | 6086 | 10447 | 5246 | 137 |
| H(42A) | 5653 | 10676 | 4715 | 119 |
| H(42B) | 5229 | 9668  | 4764 | 119 |
| H(42C) | 5550 | 9594  | 4470 | 119 |
| H(43A) | 5802 | 7550  | 4676 | 110 |
| H(43B) | 5555 | 7723  | 4995 | 110 |
| H(43C) | 6176 | 7369  | 5016 | 110 |
| H(44A) | 7364 | 7104  | 2949 | 115 |
| H(44B) | 7914 | 7236  | 3198 | 115 |
| H(44C) | 7405 | 8039  | 3234 | 115 |
| H(45A) | 6296 | 10185 | 4106 | 84  |
| H(45B) | 6377 | 10654 | 3762 | 84  |
| H(45C) | 6801 | 11008 | 4072 | 84  |
| H(47)  | 2547 | 7380  | 654  | 63  |
| H(48)  | 3358 | 8262  | 579  | 69  |
| H(49)  | 4176 | 7252  | 722  | 63  |
| H(51A) | 4628 | 5357  | 897  | 54  |
| H(51B) | 4487 | 5434  | 1249 | 54  |
| H(52A) | 4539 | 3150  | 649  | 52  |
| H(52B) | 4063 | 4080  | 543  | 52  |
| H(54)  | 4140 | 1496  | 320  | 56  |
| H(55)  | 3453 | 73    | 215  | 59  |
| H(56)  | 2716 | 183   | 483  | 58  |
| H(57)  | 2688 | 1683  | 857  | 52  |
| H(60A) | 1900 | 2377  | 1243 | 103 |
| H(60B) | 1296 | 2803  | 1251 | 103 |
| H(60C) | 1790 | 3391  | 1486 | 103 |
| H(61A) | 1595 | 4074  | 527  | 94  |

|        |          |          |         |     |
|--------|----------|----------|---------|-----|
| H(61B) | 1163     | 3260     | 661     | 94  |
| H(61C) | 1762     | 2781     | 661     | 94  |
| H(62A) | 1493     | 5397     | 1283    | 104 |
| H(62B) | 993      | 4802     | 1054    | 104 |
| H(62C) | 1395     | 5658     | 908     | 104 |
| H(63A) | 5051     | 3430     | 1157    | 52  |
| H(63B) | 4741     | 3566     | 1455    | 52  |
| H(65)  | 5235     | 1502     | 1009    | 57  |
| H(67)  | 4319     | -1254    | 1173    | 59  |
| H(70A) | 5107     | -1644    | 948     | 103 |
| H(70B) | 5589     | -741     | 1068    | 103 |
| H(70C) | 5237     | -600     | 720     | 103 |
| H(71A) | 3274     | 198      | 1404    | 62  |
| H(71B) | 3572     | -1060    | 1434    | 62  |
| H(72A) | 4353     | -1288    | 1835    | 68  |
| H(72B) | 4298     | -867     | 2188    | 68  |
| H(74)  | 5289     | -840     | 1827    | 65  |
| H(75)  | 5956     | 610      | 1807    | 69  |
| H(76)  | 5796     | 2547     | 1970    | 68  |
| H(77)  | 4962     | 2992     | 2113    | 61  |
| H(78A) | 3364     | -1469    | 1987    | 79  |
| H(78B) | 2975     | -364     | 1884    | 79  |
| H(80)  | 3077     | -1651    | 2516    | 97  |
| H(81)  | 3226     | -1010    | 3044    | 111 |
| H(82)  | 3642     | 836      | 3171    | 94  |
| H(86A) | 5032     | 4903     | 2968    | 160 |
| H(86B) | 5009     | 4193     | 2641    | 160 |
| H(86C) | 4969     | 3495     | 2963    | 160 |
| H(87A) | 4266     | 4111     | 3259    | 152 |
| H(87B) | 3672     | 4255     | 3057    | 152 |
| H(87C) | 4051     | 5389     | 3137    | 152 |
| H(88A) | 4291     | 6112     | 2650    | 184 |
| H(88B) | 3721     | 5504     | 2523    | 184 |
| H(88C) | 4226     | 5242     | 2350    | 184 |
| H(89A) | 3616     | 6402     | 1584    | 160 |
| H(89B) | 3522     | 5941     | 1926    | 160 |
| H(89C) | 3072     | 5718     | 1618    | 160 |
| H(29O) | 7800(50) | 3770(40) | 3347(8) | 156 |
| H(97A) | 7659     | 5085     | 2789    | 180 |
| H(97B) | 7521     | 3709     | 2808    | 180 |
| H(97C) | 8135     | 4130     | 2834    | 180 |
| H(30A) | 2515     | 5806     | 2414    | 242 |
| H(98A) | 2832     | 3734     | 2334    | 197 |
| H(98B) | 3164     | 4230     | 2662    | 197 |
| H(98C) | 3184     | 4912     | 2335    | 197 |
| H(31A) | 2347     | 7098     | 3179    | 239 |

|        |      |      |      |     |
|--------|------|------|------|-----|
| H(99A) | 3118 | 6317 | 3193 | 477 |
| H(99B) | 3061 | 6555 | 2818 | 477 |
| H(99C) | 2693 | 5575 | 2947 | 477 |

---

**Table S6.** Torsion angles [deg] for **0**.

---

|                        |           |
|------------------------|-----------|
| C(5)-N(2)-C(1)-C(2)    | -0.9(8)   |
| Fe(1)-N(2)-C(1)-C(2)   | 179.4(4)  |
| N(2)-C(1)-C(2)-C(3)    | 3.7(9)    |
| C(1)-C(2)-C(3)-C(4)    | -2.4(9)   |
| C(2)-C(3)-C(4)-C(5)    | -1.4(9)   |
| C(1)-N(2)-C(5)-C(4)    | -3.1(7)   |
| Fe(1)-N(2)-C(5)-C(4)   | 176.6(4)  |
| C(1)-N(2)-C(5)-C(6)    | 171.7(5)  |
| Fe(1)-N(2)-C(5)-C(6)   | -8.7(5)   |
| C(3)-C(4)-C(5)-N(2)    | 4.3(8)    |
| C(3)-C(4)-C(5)-C(6)    | -170.2(5) |
| C(7)-N(4)-C(6)-C(5)    | -144.6(4) |
| C(18)-N(4)-C(6)-C(5)   | 93.5(5)   |
| Fe(1)-N(4)-C(6)-C(5)   | -27.5(5)  |
| N(2)-C(5)-C(6)-N(4)    | 25.3(6)   |
| C(4)-C(5)-C(6)-N(4)    | -159.9(5) |
| C(6)-N(4)-C(7)-C(8)    | 79.0(5)   |
| C(18)-N(4)-C(7)-C(8)   | -159.3(4) |
| Fe(1)-N(4)-C(7)-C(8)   | -38.7(5)  |
| C(12)-N(3)-C(8)-C(9)   | 0.4(8)    |
| Fe(1)-N(3)-C(8)-C(9)   | -163.1(4) |
| C(12)-N(3)-C(8)-C(7)   | 176.4(5)  |
| Fe(1)-N(3)-C(8)-C(7)   | 13.0(6)   |
| N(4)-C(7)-C(8)-N(3)    | 18.3(6)   |
| N(4)-C(7)-C(8)-C(9)    | -165.5(5) |
| N(3)-C(8)-C(9)-C(10)   | 2.1(8)    |
| C(7)-C(8)-C(9)-C(10)   | -173.8(5) |
| C(8)-C(9)-C(10)-C(11)  | -2.5(9)   |
| C(9)-C(10)-C(11)-C(12) | 0.3(10)   |
| C(8)-N(3)-C(12)-C(11)  | -2.6(8)   |
| Fe(1)-N(3)-C(12)-C(11) | 158.5(4)  |
| C(8)-N(3)-C(12)-N(1)   | 176.8(5)  |
| Fe(1)-N(3)-C(12)-N(1)  | -22.1(7)  |
| C(10)-C(11)-C(12)-N(3) | 2.3(9)    |
| C(10)-C(11)-C(12)-N(1) | -177.1(6) |
| C(13)-N(1)-C(12)-N(3)  | 20.5(9)   |
| C(13)-N(1)-C(12)-C(11) | -160.1(6) |
| Fe(1)-O(1)-C(13)-N(1)  | -10.9(8)  |
| Fe(1)-O(1)-C(13)-C(14) | 171.3(4)  |
| C(12)-N(1)-C(13)-O(1)  | -3.5(9)   |
| C(12)-N(1)-C(13)-C(14) | 174.4(5)  |
| O(1)-C(13)-C(14)-C(15) | -3.8(7)   |
| N(1)-C(13)-C(14)-C(15) | 178.3(5)  |

|                         |           |
|-------------------------|-----------|
| O(1)-C(13)-C(14)-C(17)  | 116.2(5)  |
| N(1)-C(13)-C(14)-C(17)  | -61.7(6)  |
| O(1)-C(13)-C(14)-C(16)  | -124.0(5) |
| N(1)-C(13)-C(14)-C(16)  | 58.1(6)   |
| C(7)-N(4)-C(18)-C(19)   | 69.8(5)   |
| C(6)-N(4)-C(18)-C(19)   | -168.2(4) |
| Fe(1)-N(4)-C(18)-C(19)  | -48.7(4)  |
| N(4)-C(18)-C(19)-C(24)  | 68.2(5)   |
| N(4)-C(18)-C(19)-C(20)  | -111.0(5) |
| C(24)-C(19)-C(20)-C(21) | 1.1(7)    |
| C(18)-C(19)-C(20)-C(21) | -179.7(4) |
| C(19)-C(20)-C(21)-C(22) | 2.8(7)    |
| C(19)-C(20)-C(21)-C(25) | -177.2(5) |
| C(20)-C(21)-C(22)-C(23) | -3.4(7)   |
| C(25)-C(21)-C(22)-C(23) | 176.6(5)  |
| C(21)-C(22)-C(23)-C(24) | 0.1(7)    |
| C(21)-C(22)-C(23)-C(26) | 177.7(4)  |
| Fe(2)-O(5)-C(24)-C(19)  | 119.6(4)  |
| Fe(1)-O(5)-C(24)-C(19)  | -63.6(4)  |
| Fe(2)-O(5)-C(24)-C(23)  | -59.3(4)  |
| Fe(1)-O(5)-C(24)-C(23)  | 117.6(3)  |
| C(20)-C(19)-C(24)-O(5)  | 176.6(4)  |
| C(18)-C(19)-C(24)-O(5)  | -2.6(6)   |
| C(20)-C(19)-C(24)-C(23) | -4.5(6)   |
| C(18)-C(19)-C(24)-C(23) | 176.3(4)  |
| C(22)-C(23)-C(24)-O(5)  | -177.2(4) |
| C(26)-C(23)-C(24)-O(5)  | 5.2(6)    |
| C(22)-C(23)-C(24)-C(19) | 4.0(6)    |
| C(26)-C(23)-C(24)-C(19) | -173.7(4) |
| C(22)-C(23)-C(26)-N(8)  | -113.2(5) |
| C(24)-C(23)-C(26)-N(8)  | 64.4(5)   |
| C(33)-N(8)-C(26)-C(23)  | 179.2(4)  |
| C(27)-N(8)-C(26)-C(23)  | 56.2(5)   |
| Fe(2)-N(8)-C(26)-C(23)  | -64.0(4)  |
| C(33)-N(8)-C(27)-C(28)  | 144.6(5)  |
| C(26)-N(8)-C(27)-C(28)  | -91.9(5)  |
| Fe(2)-N(8)-C(27)-C(28)  | 28.5(5)   |
| C(32)-N(7)-C(28)-C(29)  | 0.1(6)    |
| Fe(2)-N(7)-C(28)-C(29)  | -161.9(3) |
| C(32)-N(7)-C(28)-C(27)  | -176.0(4) |
| Fe(2)-N(7)-C(28)-C(27)  | 22.0(5)   |
| N(8)-C(27)-C(28)-N(7)   | -34.6(6)  |
| N(8)-C(27)-C(28)-C(29)  | 149.3(4)  |
| N(7)-C(28)-C(29)-C(30)  | -0.7(7)   |
| C(27)-C(28)-C(29)-C(30) | 175.1(4)  |
| C(28)-C(29)-C(30)-C(31) | 0.4(7)    |



|                         |           |
|-------------------------|-----------|
| C(29)-C(30)-C(31)-C(32) | 0.6(7)    |
| C(28)-N(7)-C(32)-C(31)  | 1.0(7)    |
| Fe(2)-N(7)-C(32)-C(31)  | 161.1(4)  |
| C(30)-C(31)-C(32)-N(7)  | -1.4(7)   |
| C(26)-N(8)-C(33)-C(34)  | 163.1(4)  |
| C(27)-N(8)-C(33)-C(34)  | -73.7(5)  |
| Fe(2)-N(8)-C(33)-C(34)  | 44.3(4)   |
| C(38)-N(6)-C(34)-C(35)  | 1.8(7)    |
| Fe(2)-N(6)-C(34)-C(35)  | -177.5(4) |
| C(38)-N(6)-C(34)-C(33)  | -176.5(4) |
| Fe(2)-N(6)-C(34)-C(33)  | 4.2(5)    |
| N(8)-C(33)-C(34)-N(6)   | -33.8(6)  |
| N(8)-C(33)-C(34)-C(35)  | 147.9(5)  |
| N(6)-C(34)-C(35)-C(36)  | -2.2(8)   |
| C(33)-C(34)-C(35)-C(36) | 176.0(5)  |
| C(34)-C(35)-C(36)-C(37) | 0.0(9)    |
| C(35)-C(36)-C(37)-C(38) | 2.3(9)    |
| C(34)-N(6)-C(38)-N(5)   | -178.9(4) |
| Fe(2)-N(6)-C(38)-N(5)   | 0.3(6)    |
| C(34)-N(6)-C(38)-C(37)  | 0.6(7)    |
| Fe(2)-N(6)-C(38)-C(37)  | 179.8(4)  |
| C(39)-N(5)-C(38)-N(6)   | -0.1(8)   |
| C(39)-N(5)-C(38)-C(37)  | -179.6(5) |
| C(36)-C(37)-C(38)-N(6)  | -2.7(8)   |
| C(36)-C(37)-C(38)-N(5)  | 176.8(5)  |
| Fe(2)-O(3)-C(39)-N(5)   | 6.8(7)    |
| Fe(2)-O(3)-C(39)-C(40)  | -174.4(3) |
| C(38)-N(5)-C(39)-O(3)   | -3.3(8)   |
| C(38)-N(5)-C(39)-C(40)  | 177.8(5)  |
| O(3)-C(39)-C(40)-C(43)  | 24.7(6)   |
| N(5)-C(39)-C(40)-C(43)  | -156.4(5) |
| O(3)-C(39)-C(40)-C(41)  | 146.6(5)  |
| N(5)-C(39)-C(40)-C(41)  | -34.5(7)  |
| O(3)-C(39)-C(40)-C(42)  | -93.6(6)  |
| N(5)-C(39)-C(40)-C(42)  | 85.3(6)   |
| C(50)-N(10)-C(46)-C(47) | -2.8(6)   |
| Fe(3)-N(10)-C(46)-C(47) | 171.6(3)  |
| C(50)-N(10)-C(46)-N(9)  | 176.7(4)  |
| Fe(3)-N(10)-C(46)-N(9)  | -8.9(6)   |
| C(58)-N(9)-C(46)-N(10)  | 15.5(7)   |
| C(58)-N(9)-C(46)-C(47)  | -165.0(5) |
| N(10)-C(46)-C(47)-C(48) | 2.9(7)    |
| N(9)-C(46)-C(47)-C(48)  | -176.6(4) |
| C(46)-C(47)-C(48)-C(49) | -0.3(7)   |
| C(47)-C(48)-C(49)-C(50) | -2.3(7)   |
| C(46)-N(10)-C(50)-C(49) | 0.0(6)    |

|                         |           |
|-------------------------|-----------|
| Fe(3)-N(10)-C(50)-C(49) | -175.2(3) |
| C(46)-N(10)-C(50)-C(51) | 177.6(4)  |
| Fe(3)-N(10)-C(50)-C(51) | 2.4(5)    |
| C(48)-C(49)-C(50)-N(10) | 2.5(7)    |
| C(48)-C(49)-C(50)-C(51) | -174.9(4) |
| C(52)-N(12)-C(51)-C(50) | 73.5(5)   |
| C(63)-N(12)-C(51)-C(50) | -163.7(4) |
| Fe(3)-N(12)-C(51)-C(50) | -45.1(4)  |
| N(10)-C(50)-C(51)-N(12) | 29.4(5)   |
| C(49)-C(50)-C(51)-N(12) | -153.0(4) |
| C(51)-N(12)-C(52)-C(53) | -145.3(4) |
| C(63)-N(12)-C(52)-C(53) | 91.8(4)   |
| Fe(3)-N(12)-C(52)-C(53) | -28.4(4)  |
| C(57)-N(11)-C(53)-C(54) | -0.9(6)   |
| Fe(3)-N(11)-C(53)-C(54) | 161.8(3)  |
| C(57)-N(11)-C(53)-C(52) | 176.1(4)  |
| Fe(3)-N(11)-C(53)-C(52) | -21.1(4)  |
| N(12)-C(52)-C(53)-N(11) | 34.0(5)   |
| N(12)-C(52)-C(53)-C(54) | -148.9(4) |
| N(11)-C(53)-C(54)-C(55) | 2.1(6)    |
| C(52)-C(53)-C(54)-C(55) | -174.9(4) |
| C(53)-C(54)-C(55)-C(56) | -1.2(6)   |
| C(54)-C(55)-C(56)-C(57) | -0.7(6)   |
| C(53)-N(11)-C(57)-C(56) | -1.1(6)   |
| Fe(3)-N(11)-C(57)-C(56) | -162.1(3) |
| C(55)-C(56)-C(57)-N(11) | 1.9(7)    |
| Fe(3)-O(6)-C(58)-N(9)   | -19.9(7)  |
| Fe(3)-O(6)-C(58)-C(59)  | 158.4(4)  |
| C(46)-N(9)-C(58)-O(6)   | -1.6(8)   |
| C(46)-N(9)-C(58)-C(59)  | -180.0(5) |
| O(6)-C(58)-C(59)-C(61)  | -107.6(5) |
| N(9)-C(58)-C(59)-C(61)  | 70.8(6)   |
| O(6)-C(58)-C(59)-C(60)  | 11.6(7)   |
| N(9)-C(58)-C(59)-C(60)  | -170.1(5) |
| O(6)-C(58)-C(59)-C(62)  | 131.9(5)  |
| N(9)-C(58)-C(59)-C(62)  | -49.7(6)  |
| C(51)-N(12)-C(63)-C(64) | 179.9(4)  |
| C(52)-N(12)-C(63)-C(64) | -57.4(5)  |
| Fe(3)-N(12)-C(63)-C(64) | 62.9(4)   |
| N(12)-C(63)-C(64)-C(69) | -65.2(5)  |
| N(12)-C(63)-C(64)-C(65) | 113.7(4)  |
| C(69)-C(64)-C(65)-C(66) | 0.7(6)    |
| C(63)-C(64)-C(65)-C(66) | -178.3(4) |
| C(64)-C(65)-C(66)-C(67) | 1.5(7)    |
| C(64)-C(65)-C(66)-C(70) | -177.0(4) |
| C(65)-C(66)-C(67)-C(68) | -2.5(7)   |

|                         |           |
|-------------------------|-----------|
| C(70)-C(66)-C(67)-C(68) | 175.9(4)  |
| C(66)-C(67)-C(68)-C(69) | 1.3(6)    |
| C(66)-C(67)-C(68)-C(71) | -173.2(4) |
| Fe(3)-O(10)-C(69)-C(68) | -123.4(3) |
| Fe(4)-O(10)-C(69)-C(68) | 57.6(4)   |
| Fe(3)-O(10)-C(69)-C(64) | 57.5(4)   |
| Fe(4)-O(10)-C(69)-C(64) | -121.6(3) |
| C(67)-C(68)-C(69)-O(10) | -178.2(4) |
| C(71)-C(68)-C(69)-O(10) | -3.6(6)   |
| C(67)-C(68)-C(69)-C(64) | 1.0(6)    |
| C(71)-C(68)-C(69)-C(64) | 175.5(4)  |
| C(65)-C(64)-C(69)-O(10) | 177.3(4)  |
| C(63)-C(64)-C(69)-O(10) | -3.8(6)   |
| C(65)-C(64)-C(69)-C(68) | -1.9(6)   |
| C(63)-C(64)-C(69)-C(68) | 177.0(4)  |
| C(78)-N(16)-C(71)-C(68) | -177.2(5) |
| C(72)-N(16)-C(71)-C(68) | -55.3(5)  |
| Fe(4)-N(16)-C(71)-C(68) | 63.5(4)   |
| C(67)-C(68)-C(71)-N(16) | 110.1(5)  |
| C(69)-C(68)-C(71)-N(16) | -64.4(5)  |
| C(78)-N(16)-C(72)-C(73) | -148.9(5) |
| C(71)-N(16)-C(72)-C(73) | 88.5(5)   |
| Fe(4)-N(16)-C(72)-C(73) | -32.9(5)  |
| C(77)-N(15)-C(73)-C(74) | 0.3(6)    |
| Fe(4)-N(15)-C(73)-C(74) | 156.2(4)  |
| C(77)-N(15)-C(73)-C(72) | 179.2(4)  |
| Fe(4)-N(15)-C(73)-C(72) | -24.9(5)  |
| N(16)-C(72)-C(73)-N(15) | 40.4(6)   |
| N(16)-C(72)-C(73)-C(74) | -140.7(5) |
| N(15)-C(73)-C(74)-C(75) | -2.2(7)   |
| C(72)-C(73)-C(74)-C(75) | 179.0(4)  |
| C(73)-C(74)-C(75)-C(76) | 3.0(7)    |
| C(74)-C(75)-C(76)-C(77) | -2.0(7)   |
| C(73)-N(15)-C(77)-C(76) | 0.7(7)    |
| Fe(4)-N(15)-C(77)-C(76) | -152.9(4) |
| C(75)-C(76)-C(77)-N(15) | 0.1(7)    |
| C(71)-N(16)-C(78)-C(79) | -167.1(5) |
| C(72)-N(16)-C(78)-C(79) | 70.4(6)   |
| Fe(4)-N(16)-C(78)-C(79) | -45.4(5)  |
| C(83)-N(14)-C(79)-C(80) | 1.9(9)    |
| Fe(4)-N(14)-C(79)-C(80) | -176.6(6) |
| C(83)-N(14)-C(79)-C(78) | -177.7(5) |
| Fe(4)-N(14)-C(79)-C(78) | 3.8(7)    |
| N(16)-C(78)-C(79)-N(14) | 28.3(8)   |
| N(16)-C(78)-C(79)-C(80) | -151.3(6) |
| N(14)-C(79)-C(80)-C(81) | -1.7(11)  |

|                         |           |
|-------------------------|-----------|
| C(78)-C(79)-C(80)-C(81) | 177.9(7)  |
| C(79)-C(80)-C(81)-C(82) | 0.4(13)   |
| C(80)-C(81)-C(82)-C(83) | 0.6(12)   |
| C(79)-N(14)-C(83)-C(82) | -0.9(9)   |
| Fe(4)-N(14)-C(83)-C(82) | 177.4(5)  |
| C(79)-N(14)-C(83)-N(13) | 177.0(6)  |
| Fe(4)-N(14)-C(83)-N(13) | -4.7(8)   |
| C(81)-C(82)-C(83)-N(14) | -0.4(11)  |
| C(81)-C(82)-C(83)-N(13) | -178.4(7) |
| C(84)-N(13)-C(83)-N(14) | 19.2(10)  |
| C(84)-N(13)-C(83)-C(82) | -162.8(7) |
| Fe(4)-O(8)-C(84)-N(13)  | -16.0(10) |
| Fe(4)-O(8)-C(84)-C(85)  | 163.1(5)  |
| C(83)-N(13)-C(84)-O(8)  | -9.8(11)  |
| C(83)-N(13)-C(84)-C(85) | 171.0(6)  |
| O(8)-C(84)-C(85)-C(86)  | -95.0(8)  |
| N(13)-C(84)-C(85)-C(86) | 84.2(7)   |
| O(8)-C(84)-C(85)-C(88)  | 23.0(9)   |
| N(13)-C(84)-C(85)-C(88) | -157.8(7) |
| O(8)-C(84)-C(85)-C(87)  | 143.0(7)  |
| N(13)-C(84)-C(85)-C(87) | -37.8(9)  |
| O(19)-S(3)-C(93)-F(9)   | -52.6(6)  |
| O(17)-S(3)-C(93)-F(9)   | -177.9(5) |
| O(18)-S(3)-C(93)-F(9)   | 66.6(6)   |
| O(19)-S(3)-C(93)-F(7)   | -177.3(6) |
| O(17)-S(3)-C(93)-F(7)   | 57.4(7)   |
| O(18)-S(3)-C(93)-F(7)   | -58.1(7)  |
| O(19)-S(3)-C(93)-F(8)   | 63.2(7)   |
| O(17)-S(3)-C(93)-F(8)   | -62.1(6)  |
| O(18)-S(3)-C(93)-F(8)   | -177.6(6) |
| O(21)-S(4)-C(94)-F(12)  | -172.4(4) |
| O(20)-S(4)-C(94)-F(12)  | 67.2(4)   |
| O(22)-S(4)-C(94)-F(12)  | -52.9(4)  |
| O(21)-S(4)-C(94)-F(10)  | -52.5(5)  |
| O(20)-S(4)-C(94)-F(10)  | -173.0(4) |
| O(22)-S(4)-C(94)-F(10)  | 67.0(4)   |
| O(21)-S(4)-C(94)-F(11)  | 68.2(4)   |
| O(20)-S(4)-C(94)-F(11)  | -52.2(4)  |
| O(22)-S(4)-C(94)-F(11)  | -172.3(4) |
| O(25)-S(5)-C(95)-F(13)  | 64.6(6)   |
| O(23)-S(5)-C(95)-F(13)  | -55.2(6)  |
| O(24)-S(5)-C(95)-F(13)  | -174.0(5) |
| O(25)-S(5)-C(95)-F(14)  | -177.4(6) |
| O(23)-S(5)-C(95)-F(14)  | 62.8(6)   |
| O(24)-S(5)-C(95)-F(14)  | -56.0(6)  |
| O(25)-S(5)-C(95)-F(15)  | -56.0(6)  |

|                           |           |
|---------------------------|-----------|
| O(23)-S(5)-C(95)-F(15)    | -175.8(5) |
| O(24)-S(5)-C(95)-F(15)    | 65.4(6)   |
| F(2)-C(91)-S(1)-O(11)     | 177.6(12) |
| F(3)-C(91)-S(1)-O(11)     | 55.9(10)  |
| F(1)-C(91)-S(1)-O(11)     | -62.9(10) |
| F(2)-C(91)-S(1)-O(12)     | -61.9(10) |
| F(3)-C(91)-S(1)-O(12)     | 176.4(6)  |
| F(1)-C(91)-S(1)-O(12)     | 57.6(7)   |
| F(2)-C(91)-S(1)-O(13)     | 58.7(9)   |
| F(3)-C(91)-S(1)-O(13)     | -63.0(6)  |
| F(1)-C(91)-S(1)-O(13)     | 178.2(6)  |
| F(3A)-C(91A)-S(1A)-O(12A) | -63.7(19) |
| F(1A)-C(91A)-S(1A)-O(12A) | 172.4(19) |
| F(2A)-C(91A)-S(1A)-O(12A) | 54(2)     |
| F(3A)-C(91A)-S(1A)-O(13A) | 175.6(18) |
| F(1A)-C(91A)-S(1A)-O(13A) | 51.7(19)  |
| F(2A)-C(91A)-S(1A)-O(13A) | -67(2)    |
| F(3A)-C(91A)-S(1A)-O(11A) | 58(2)     |
| F(1A)-C(91A)-S(1A)-O(11A) | -66(2)    |
| F(2A)-C(91A)-S(1A)-O(11A) | 176(2)    |
| F(4)-C(92)-S(2)-O(16)     | 173.9(6)  |
| F(6)-C(92)-S(2)-O(16)     | -64.8(6)  |
| F(5)-C(92)-S(2)-O(16)     | 53.8(6)   |
| F(4)-C(92)-S(2)-O(14)     | 55.6(7)   |
| F(6)-C(92)-S(2)-O(14)     | 176.9(6)  |
| F(5)-C(92)-S(2)-O(14)     | -64.4(7)  |
| F(4)-C(92)-S(2)-O(15)     | -64.8(7)  |
| F(6)-C(92)-S(2)-O(15)     | 56.5(6)   |
| F(5)-C(92)-S(2)-O(15)     | 175.1(6)  |

---

Symmetry transformations used to generate equivalent atoms:

#1  $-x+1/2, y, -z+1/2$

**Table S7.** Hydrogen bonds for **0** [Å and deg.].

---

| D-H...A                                         | d(D-H)  | d(H...A) | d(D...A)  | <(DHA) |
|-------------------------------------------------|---------|----------|-----------|--------|
| O(2)-H(2O)...O(29)                              | 0.95    | 1.80     | 2.663(7)  | 149.4  |
| O(4)-H(4O)...O(1)                               | 0.95    | 2.60     | 3.352(4)  | 136.1  |
| O(31)-H(31A)...O(14)                            | 0.84    | 2.37     | 2.942(13) | 125.9  |
| O(30)-H(30A)...O(31)#1                          | 0.84    | 2.40     | 3.191(14) | 157.3  |
| O(4)-H(4O)...O(24)#2                            | 0.95    | 2.15     | 2.720(5)  | 117.1  |
| O(7)-H(7)...O(8)                                | 0.95    | 2.56     | 3.271(5)  | 131.3  |
| O(7)-H(7)...O(17)                               | 0.95    | 2.30     | 2.956(7)  | 125.6  |
| O(9A <sup>b</sup> )-H(9O2 <sup>b</sup> )...O(7) | 0.95    | 2.52     | 3.223(11) | 131.1  |
| N(1)-H(1A)...O(19)                              | 0.88    | 2.12     | 2.988(6)  | 168.8  |
| N(5)-H(5A)...O(12 <sup>a</sup> )#2              | 0.88    | 2.30     | 2.882(8)  | 124.1  |
| N(5)-H(5A)...O(12A <sup>b</sup> )#2             | 0.88    | 2.09     | 2.903(17) | 153.8  |
| N(9)-H(9A)...O(11A <sup>b</sup> )#3             | 0.88    | 2.05     | 2.881(17) | 157.3  |
| N(13)-H(13A)...O(22)                            | 0.88    | 2.04     | 2.869(6)  | 157.7  |
| O(29)-H(29O)...O(25)                            | 0.92(2) | 1.92(4)  | 2.779(9)  | 156(5) |

---

Symmetry transformations used to generate equivalent atoms:

#1  $-x+1/2, y, -z+1/2$  #2  $x, y+1, z$  #3  $x-1/2, -y+1, z-1/2$

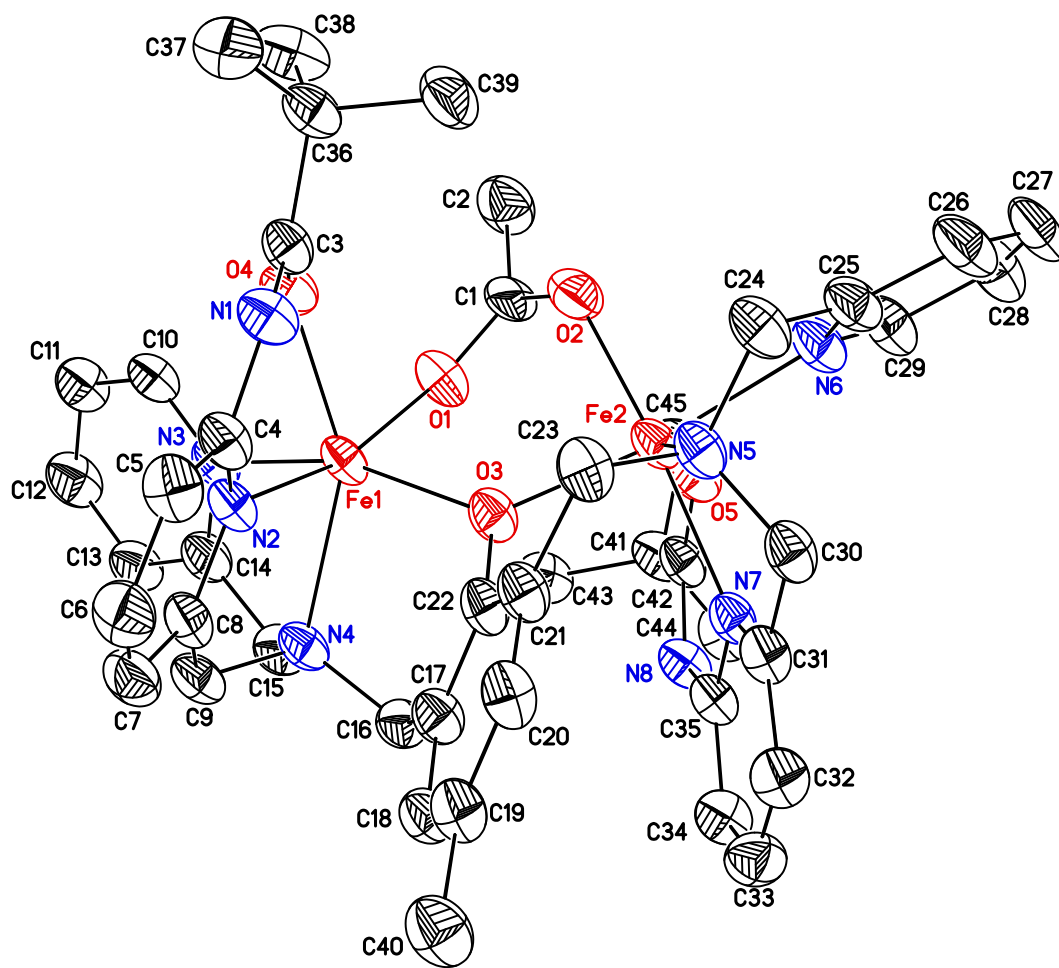

**Figure S24.** Crystal structure of complex **1** with ellipsoids drawn at 50% probability and atomic labeling scheme as indicated. Solvent molecules and hydrogen atoms are omitted for clarity.

**Table S8.** Crystal data and structure refinement for complex **1** (CCDC #2084745).

|                                   |                                                                                                                                               |
|-----------------------------------|-----------------------------------------------------------------------------------------------------------------------------------------------|
| Identification Code               | hd2135                                                                                                                                        |
| Empirical formula                 | C <sub>49</sub> H <sub>58</sub> C <sub>14</sub> F <sub>6</sub> Fe <sub>2</sub> N <sub>8</sub> O <sub>11</sub> S <sub>2</sub>                  |
| Formula weight                    | 1366.65                                                                                                                                       |
| Temperature                       | 85(2) K                                                                                                                                       |
| Wavelength                        | 1.54184 Å                                                                                                                                     |
| Crystal system, space group       | Triclinic, P-1                                                                                                                                |
| Unit cell dimensions              | a = 12.2466(4) Å      alpha = 101.362(4) deg.<br>b = 12.2933(6) Å      beta = 91.443(3) deg.<br>c = 20.4907(10) Å      gamma = 99.817(3) deg. |
| Volume                            | 2974.6(2) Å <sup>3</sup>                                                                                                                      |
| Z, Calculated density             | 2, 1.526 Mg/m <sup>3</sup>                                                                                                                    |
| Absorption coefficient            | 6.929 mm <sup>-1</sup>                                                                                                                        |
| F(000)                            | 1404                                                                                                                                          |
| Crystal size                      | 0.150 x 0.070 x 0.020 mm                                                                                                                      |
| Theta range for data collection   | 2.203 to 70.138 deg.                                                                                                                          |
| Limiting indices                  | -14<=h<=14, -14<=k<=14, -24<=l<=24                                                                                                            |
| Reflections collected / unique    | 44463 / 10747 [R(int) = 0.0713]                                                                                                               |
| Completeness to theta = 67.684    | 97.5 %                                                                                                                                        |
| Absorption correction             | Semi-empirical from equivalents                                                                                                               |
| Max. and min. transmission        | 1.00000 and 0.67427                                                                                                                           |
| Refinement method                 | Full-matrix least-squares on F <sup>2</sup>                                                                                                   |
| Data / restraints / parameters    | 10747 / 1 / 754                                                                                                                               |
| Goodness-of-fit on F <sup>2</sup> | 1.082                                                                                                                                         |
| Final R indices [I>2sigma(I)]     | R1 = 0.0734, wR2 = 0.2015                                                                                                                     |
| R indices (all data)              | R1 = 0.0808, wR2 = 0.2131                                                                                                                     |
| Extinction coefficient            | 0.00064(15)                                                                                                                                   |
| Largest diff. peak and hole       | 1.365 and -0.919 e x Å <sup>-3</sup>                                                                                                          |



**Table S9.** Atomic coordinates ( $\times 10^4$ ) and equivalent isotropic displacement parameters ( $\text{\AA}^2 \times 10^3$ ) for **1**. U(eq) is defined as one third of the trace of the orthogonalized Uij tensor.

|       | x        | y        | z       | U(eq) |
|-------|----------|----------|---------|-------|
| Fe(1) | 1507(1)  | 7049(1)  | 6896(1) | 30(1) |
| Fe(2) | 2276(1)  | 5888(1)  | 8311(1) | 32(1) |
| O(1)  | 439(3)   | 7119(3)  | 7680(2) | 44(1) |
| O(2)  | 584(3)   | 5496(3)  | 7997(2) | 46(1) |
| O(3)  | 2632(2)  | 6520(2)  | 7459(1) | 34(1) |
| O(4)  | 284(2)   | 5675(2)  | 6366(2) | 38(1) |
| O(5)  | 1876(2)  | 7141(2)  | 9066(2) | 37(1) |
| O(6)  | 4187(3)  | 1660(3)  | 8391(2) | 59(1) |
| O(7)  | 4572(3)  | 807(3)   | 9323(2) | 57(1) |
| O(8)  | 5911(3)  | 971(3)   | 8479(2) | 48(1) |
| O(9)  | 2989(3)  | 1768(3)  | 6352(2) | 55(1) |
| O(10) | 2221(3)  | 2501(3)  | 5473(2) | 55(1) |
| O(11) | 4215(3)  | 2904(3)  | 5737(2) | 44(1) |
| N(1)  | 1446(3)  | 4618(3)  | 5811(2) | 36(1) |
| N(2)  | 2346(3)  | 6517(3)  | 5990(2) | 31(1) |
| N(3)  | 640(3)   | 8248(3)  | 6551(2) | 34(1) |
| N(4)  | 2822(3)  | 8572(3)  | 6882(2) | 33(1) |
| N(5)  | 3275(3)  | 4567(3)  | 7934(2) | 34(1) |
| N(6)  | 1953(3)  | 4696(3)  | 8976(2) | 40(1) |
| N(7)  | 3943(3)  | 6688(3)  | 8731(2) | 32(1) |
| N(8)  | 3444(3)  | 8465(3)  | 9141(2) | 34(1) |
| C(1)  | 19(4)    | 6274(4)  | 7931(3) | 56(2) |
| C(2)  | -1157(4) | 6083(5)  | 8040(3) | 54(1) |
| C(3)  | 476(3)   | 4740(3)  | 6083(2) | 33(1) |
| C(4)  | 2305(3)  | 5449(4)  | 5682(2) | 34(1) |
| C(5)  | 3059(4)  | 5096(4)  | 5222(2) | 40(1) |
| C(6)  | 3883(4)  | 5915(5)  | 5071(2) | 46(1) |
| C(7)  | 3929(4)  | 7028(4)  | 5373(2) | 43(1) |
| C(8)  | 3166(4)  | 7305(4)  | 5840(2) | 36(1) |
| C(9)  | 3164(4)  | 8489(4)  | 6191(2) | 38(1) |
| C(10) | -357(4)  | 7999(4)  | 6228(2) | 37(1) |
| C(11) | -883(4)  | 8795(4)  | 6035(3) | 44(1) |
| C(12) | -350(4)  | 9908(4)  | 6182(3) | 49(1) |
| C(13) | 686(4)   | 10184(4) | 6527(3) | 42(1) |
| C(14) | 1154(4)  | 9339(4)  | 6704(2) | 38(1) |
| C(15) | 2273(4)  | 9560(3)  | 7080(2) | 40(1) |
| C(16) | 3794(3)  | 8646(3)  | 7353(2) | 35(1) |
| C(17) | 4304(4)  | 7605(3)  | 7188(2) | 36(1) |

|       |          |         |          |        |
|-------|----------|---------|----------|--------|
| C(18) | 5366(4)  | 7638(4) | 6964(2)  | 37(1)  |
| C(19) | 5819(4)  | 6662(4) | 6784(2)  | 40(1)  |
| C(20) | 5192(4)  | 5648(4) | 6855(2)  | 38(1)  |
| C(21) | 4134(4)  | 5582(3) | 7096(2)  | 35(1)  |
| C(22) | 3680(4)  | 6569(3) | 7252(2)  | 33(1)  |
| C(23) | 3477(4)  | 4500(4) | 7216(2)  | 38(1)  |
| C(24) | 2610(4)  | 3496(3) | 8044(2)  | 43(1)  |
| C(25) | 2223(4)  | 3672(4) | 8745(2)  | 40(1)  |
| C(26) | 2163(4)  | 2863(4) | 9128(3)  | 51(1)  |
| C(27) | 1782(4)  | 3096(4) | 9765(3)  | 53(1)  |
| C(28) | 1474(5)  | 4111(5) | 9994(3)  | 54(1)  |
| C(29) | 1580(4)  | 4905(4) | 9588(2)  | 44(1)  |
| C(30) | 4331(4)  | 4829(4) | 8339(2)  | 36(1)  |
| C(31) | 4740(4)  | 6073(4) | 8550(2)  | 35(1)  |
| C(32) | 5850(4)  | 6549(4) | 8572(2)  | 40(1)  |
| C(33) | 6149(4)  | 7707(4) | 8777(2)  | 45(1)  |
| C(34) | 5354(4)  | 8347(4) | 8968(2)  | 40(1)  |
| C(35) | 4262(3)  | 7808(3) | 8941(2)  | 33(1)  |
| C(36) | -390(4)  | 3681(4) | 6055(2)  | 38(1)  |
| C(37) | -464(4)  | 2872(4) | 5391(3)  | 51(1)  |
| C(38) | -1520(4) | 4041(4) | 6190(3)  | 54(1)  |
| C(39) | -57(5)   | 3127(4) | 6624(3)  | 49(1)  |
| C(40) | 6964(4)  | 6735(4) | 6518(3)  | 49(1)  |
| C(41) | 2354(4)  | 8122(3) | 9223(2)  | 35(1)  |
| C(42) | 1696(4)  | 9046(4) | 9516(3)  | 42(1)  |
| C(43) | 1499(4)  | 9679(4) | 8958(3)  | 46(1)  |
| C(44) | 2301(5)  | 9843(4) | 10119(3) | 50(1)  |
| C(45) | 555(4)   | 8461(4) | 9684(3)  | 53(1)  |
| C(46) | 5665(4)  | 2771(4) | 9304(2)  | 44(1)  |
| C(47) | 3297(4)  | 910(4)  | 5141(2)  | 38(1)  |
| C(48) | 8371(7)  | 668(9)  | 7917(4)  | 97(3)  |
| C(49) | 4355(5)  | 8023(5) | 2971(3)  | 59(1)  |
| S(1)  | 5013(1)  | 1400(1) | 8815(1)  | 43(1)  |
| S(2)  | 3174(1)  | 2165(1) | 5742(1)  | 39(1)  |
| Cl(1) | 9472(2)  | 1766(2) | 8270(1)  | 114(1) |
| Cl(2) | 8723(2)  | -689(2) | 7934(1)  | 86(1)  |
| Cl(3) | 3738(1)  | 9089(1) | 3446(1)  | 69(1)  |
| Cl(4) | 3396(2)  | 6811(1) | 2631(1)  | 75(1)  |
| F(1)  | 4943(3)  | 3258(2) | 9690(2)  | 58(1)  |
| F(2)  | 6510(3)  | 2688(3) | 9696(2)  | 56(1)  |
| F(3)  | 6058(3)  | 3481(2) | 8916(2)  | 55(1)  |
| F(4)  | 4129(2)  | 436(2)  | 5322(2)  | 52(1)  |
| F(5)  | 3504(2)  | 1148(2) | 4537(1)  | 47(1)  |
| F(6)  | 2376(2)  | 127(2)  | 5064(1)  | 46(1)  |

---

**Table S10.** Bond lengths [ $\text{\AA}$ ] and angles [deg] for **1**.

---

|            |          |
|------------|----------|
| Fe(1)-O(3) | 2.042(3) |
| Fe(1)-O(1) | 2.094(3) |
| Fe(1)-O(4) | 2.148(3) |
| Fe(1)-N(3) | 2.170(4) |
| Fe(1)-N(2) | 2.186(3) |
| Fe(1)-N(4) | 2.257(3) |
| Fe(2)-O(3) | 2.073(3) |
| Fe(2)-O(5) | 2.088(3) |
| Fe(2)-O(2) | 2.100(3) |
| Fe(2)-N(7) | 2.184(4) |
| Fe(2)-N(6) | 2.185(4) |
| Fe(2)-N(5) | 2.228(3) |
| O(1)-C(1)  | 1.284(5) |
| O(2)-C(1)  | 1.299(6) |
| O(3)-C(22) | 1.357(5) |
| O(4)-C(3)  | 1.245(5) |
| O(5)-C(41) | 1.224(5) |
| O(6)-S(1)  | 1.434(4) |
| O(7)-S(1)  | 1.448(3) |
| O(8)-S(1)  | 1.433(3) |
| O(9)-S(2)  | 1.439(4) |
| O(10)-S(2) | 1.434(4) |
| O(11)-S(2) | 1.435(3) |
| N(1)-C(3)  | 1.344(5) |
| N(1)-C(4)  | 1.406(5) |
| N(1)-H(1N) | 0.79(4)  |
| N(2)-C(4)  | 1.332(5) |
| N(2)-C(8)  | 1.357(5) |
| N(3)-C(10) | 1.332(6) |
| N(3)-C(14) | 1.354(6) |
| N(4)-C(9)  | 1.476(6) |
| N(4)-C(15) | 1.480(5) |
| N(4)-C(16) | 1.491(6) |
| N(5)-C(30) | 1.471(6) |
| N(5)-C(24) | 1.485(5) |
| N(5)-C(23) | 1.488(6) |
| N(6)-C(29) | 1.339(6) |
| N(6)-C(25) | 1.354(6) |
| N(7)-C(35) | 1.345(5) |
| N(7)-C(31) | 1.349(5) |
| N(8)-C(41) | 1.355(6) |
| N(8)-C(35) | 1.411(5) |
| N(8)-H(8N) | 0.79(4)  |

|              |          |
|--------------|----------|
| C(1)-C(2)    | 1.449(7) |
| C(2)-H(2A)   | 0.9800   |
| C(2)-H(2B)   | 0.9800   |
| C(2)-H(2C)   | 0.9800   |
| C(3)-C(36)   | 1.523(6) |
| C(4)-C(5)    | 1.396(6) |
| C(5)-C(6)    | 1.386(7) |
| C(5)-H(5)    | 0.9500   |
| C(6)-C(7)    | 1.377(7) |
| C(6)-H(6)    | 0.9500   |
| C(7)-C(8)    | 1.388(6) |
| C(7)-H(7)    | 0.9500   |
| C(8)-C(9)    | 1.492(6) |
| C(9)-H(9A)   | 0.9900   |
| C(9)-H(9B)   | 0.9900   |
| C(10)-C(11)  | 1.372(7) |
| C(10)-H(10)  | 0.9500   |
| C(11)-C(12)  | 1.382(7) |
| C(11)-H(11)  | 0.9500   |
| C(12)-C(13)  | 1.392(7) |
| C(12)-H(12)  | 0.9500   |
| C(13)-C(14)  | 1.371(6) |
| C(13)-H(13)  | 0.9500   |
| C(14)-C(15)  | 1.510(6) |
| C(15)-H(15A) | 0.9900   |
| C(15)-H(15B) | 0.9900   |
| C(16)-C(17)  | 1.502(6) |
| C(16)-H(16A) | 0.9900   |
| C(16)-H(16B) | 0.9900   |
| C(17)-C(18)  | 1.386(6) |
| C(17)-C(22)  | 1.401(6) |
| C(18)-C(19)  | 1.396(6) |
| C(18)-H(18)  | 0.9500   |
| C(19)-C(20)  | 1.385(6) |
| C(19)-C(40)  | 1.512(6) |
| C(20)-C(21)  | 1.394(6) |
| C(20)-H(20)  | 0.9500   |
| C(21)-C(22)  | 1.404(6) |
| C(21)-C(23)  | 1.500(6) |
| C(23)-H(23A) | 0.9900   |
| C(23)-H(23B) | 0.9900   |
| C(24)-C(25)  | 1.511(7) |
| C(24)-H(24A) | 0.9900   |
| C(24)-H(24B) | 0.9900   |
| C(25)-C(26)  | 1.377(6) |
| C(26)-C(27)  | 1.391(8) |

|              |          |
|--------------|----------|
| C(26)-H(26)  | 0.9500   |
| C(27)-C(28)  | 1.363(8) |
| C(27)-H(27)  | 0.9500   |
| C(28)-C(29)  | 1.393(7) |
| C(28)-H(28)  | 0.9500   |
| C(29)-H(29)  | 0.9500   |
| C(30)-C(31)  | 1.499(6) |
| C(30)-H(30A) | 0.9900   |
| C(30)-H(30B) | 0.9900   |
| C(31)-C(32)  | 1.381(6) |
| C(32)-C(33)  | 1.384(7) |
| C(32)-H(32)  | 0.9500   |
| C(33)-C(34)  | 1.372(7) |
| C(33)-H(33)  | 0.9500   |
| C(34)-C(35)  | 1.382(6) |
| C(34)-H(34)  | 0.9500   |
| C(36)-C(37)  | 1.508(7) |
| C(36)-C(38)  | 1.539(7) |
| C(36)-C(39)  | 1.542(7) |
| C(37)-H(37A) | 0.9800   |
| C(37)-H(37B) | 0.9800   |
| C(37)-H(37C) | 0.9800   |
| C(38)-H(38A) | 0.9800   |
| C(38)-H(38B) | 0.9800   |
| C(38)-H(38C) | 0.9800   |
| C(39)-H(39A) | 0.9800   |
| C(39)-H(39B) | 0.9800   |
| C(39)-H(39C) | 0.9800   |
| C(40)-H(40A) | 0.9800   |
| C(40)-H(40B) | 0.9800   |
| C(40)-H(40C) | 0.9800   |
| C(41)-C(42)  | 1.538(6) |
| C(42)-C(44)  | 1.506(7) |
| C(42)-C(45)  | 1.538(6) |
| C(42)-C(43)  | 1.539(7) |
| C(43)-H(43A) | 0.9800   |
| C(43)-H(43B) | 0.9800   |
| C(43)-H(43C) | 0.9800   |
| C(44)-H(44A) | 0.9800   |
| C(44)-H(44B) | 0.9800   |
| C(44)-H(44C) | 0.9800   |
| C(45)-H(45A) | 0.9800   |
| C(45)-H(45B) | 0.9800   |
| C(45)-H(45C) | 0.9800   |
| C(46)-F(2)   | 1.324(6) |
| C(46)-F(3)   | 1.331(5) |

|                 |            |
|-----------------|------------|
| C(46)-F(1)      | 1.340(6)   |
| C(46)-S(1)      | 1.822(5)   |
| C(47)-F(4)      | 1.335(5)   |
| C(47)-F(6)      | 1.337(5)   |
| C(47)-F(5)      | 1.347(5)   |
| C(47)-S(2)      | 1.805(5)   |
| C(48)-Cl(1)     | 1.763(10)  |
| C(48)-Cl(2)     | 1.799(10)  |
| C(48)-H(48A)    | 0.9900     |
| C(48)-H(48B)    | 0.9900     |
| C(49)-Cl(4)     | 1.743(6)   |
| C(49)-Cl(3)     | 1.763(6)   |
| C(49)-H(49A)    | 0.9900     |
| C(49)-H(49B)    | 0.9900     |
| O(3)-Fe(1)-O(1) | 90.02(13)  |
| O(3)-Fe(1)-O(4) | 112.25(12) |
| O(1)-Fe(1)-O(4) | 86.24(12)  |
| O(3)-Fe(1)-N(3) | 156.79(13) |
| O(1)-Fe(1)-N(3) | 86.37(13)  |
| O(4)-Fe(1)-N(3) | 90.41(13)  |
| O(3)-Fe(1)-N(2) | 91.15(12)  |
| O(1)-Fe(1)-N(2) | 164.27(13) |
| O(4)-Fe(1)-N(2) | 78.80(12)  |
| N(3)-Fe(1)-N(2) | 98.48(13)  |
| O(3)-Fe(1)-N(4) | 87.14(12)  |
| O(1)-Fe(1)-N(4) | 118.53(13) |
| O(4)-Fe(1)-N(4) | 149.32(12) |
| N(3)-Fe(1)-N(4) | 74.62(13)  |
| N(2)-Fe(1)-N(4) | 77.20(13)  |
| O(3)-Fe(2)-O(5) | 110.48(11) |
| O(3)-Fe(2)-O(2) | 89.91(12)  |
| O(5)-Fe(2)-O(2) | 87.49(13)  |
| O(3)-Fe(2)-N(7) | 88.79(12)  |
| O(5)-Fe(2)-N(7) | 80.40(12)  |
| O(2)-Fe(2)-N(7) | 166.51(13) |
| O(3)-Fe(2)-N(6) | 160.54(13) |
| O(5)-Fe(2)-N(6) | 88.86(13)  |
| O(2)-Fe(2)-N(6) | 88.69(14)  |
| N(7)-Fe(2)-N(6) | 96.94(14)  |
| O(3)-Fe(2)-N(5) | 87.50(12)  |
| O(5)-Fe(2)-N(5) | 151.27(13) |
| O(2)-Fe(2)-N(5) | 115.66(14) |
| N(7)-Fe(2)-N(5) | 77.70(13)  |
| N(6)-Fe(2)-N(5) | 75.67(13)  |
| C(1)-O(1)-Fe(1) | 125.0(4)   |
| C(1)-O(2)-Fe(2) | 121.7(3)   |

|                  |            |
|------------------|------------|
| C(22)-O(3)-Fe(1) | 117.4(2)   |
| C(22)-O(3)-Fe(2) | 118.0(2)   |
| Fe(1)-O(3)-Fe(2) | 124.61(14) |
| C(3)-O(4)-Fe(1)  | 125.1(3)   |
| C(41)-O(5)-Fe(2) | 126.8(3)   |
| C(3)-N(1)-C(4)   | 129.1(4)   |
| C(3)-N(1)-H(1N)  | 113(4)     |
| C(4)-N(1)-H(1N)  | 117(4)     |
| C(4)-N(2)-C(8)   | 117.6(3)   |
| C(4)-N(2)-Fe(1)  | 124.7(3)   |
| C(8)-N(2)-Fe(1)  | 115.6(3)   |
| C(10)-N(3)-C(14) | 118.5(4)   |
| C(10)-N(3)-Fe(1) | 125.5(3)   |
| C(14)-N(3)-Fe(1) | 115.9(3)   |
| C(9)-N(4)-C(15)  | 110.3(3)   |
| C(9)-N(4)-C(16)  | 110.9(3)   |
| C(15)-N(4)-C(16) | 110.4(3)   |
| C(9)-N(4)-Fe(1)  | 107.5(2)   |
| C(15)-N(4)-Fe(1) | 105.6(2)   |
| C(16)-N(4)-Fe(1) | 112.0(2)   |
| C(30)-N(5)-C(24) | 109.9(3)   |
| C(30)-N(5)-C(23) | 110.7(3)   |
| C(24)-N(5)-C(23) | 110.9(3)   |
| C(30)-N(5)-Fe(2) | 108.2(2)   |
| C(24)-N(5)-Fe(2) | 105.2(3)   |
| C(23)-N(5)-Fe(2) | 111.7(3)   |
| C(29)-N(6)-C(25) | 118.3(4)   |
| C(29)-N(6)-Fe(2) | 126.5(3)   |
| C(25)-N(6)-Fe(2) | 115.1(3)   |
| C(35)-N(7)-C(31) | 117.6(4)   |
| C(35)-N(7)-Fe(2) | 123.7(3)   |
| C(31)-N(7)-Fe(2) | 114.6(3)   |
| C(41)-N(8)-C(35) | 129.0(4)   |
| C(41)-N(8)-H(8N) | 119(4)     |
| C(35)-N(8)-H(8N) | 112(4)     |
| O(1)-C(1)-O(2)   | 121.1(5)   |
| O(1)-C(1)-C(2)   | 119.5(5)   |
| O(2)-C(1)-C(2)   | 118.6(4)   |
| C(1)-C(2)-H(2A)  | 109.5      |
| C(1)-C(2)-H(2B)  | 109.5      |
| H(2A)-C(2)-H(2B) | 109.5      |
| C(1)-C(2)-H(2C)  | 109.5      |
| H(2A)-C(2)-H(2C) | 109.5      |
| H(2B)-C(2)-H(2C) | 109.5      |
| O(4)-C(3)-N(1)   | 122.2(4)   |
| O(4)-C(3)-C(36)  | 120.0(4)   |

|                     |          |
|---------------------|----------|
| N(1)-C(3)-C(36)     | 117.8(4) |
| N(2)-C(4)-C(5)      | 123.9(4) |
| N(2)-C(4)-N(1)      | 119.0(4) |
| C(5)-C(4)-N(1)      | 117.0(4) |
| C(6)-C(5)-C(4)      | 117.5(4) |
| C(6)-C(5)-H(5)      | 121.3    |
| C(4)-C(5)-H(5)      | 121.3    |
| C(7)-C(6)-C(5)      | 119.6(4) |
| C(7)-C(6)-H(6)      | 120.2    |
| C(5)-C(6)-H(6)      | 120.2    |
| C(6)-C(7)-C(8)      | 119.2(4) |
| C(6)-C(7)-H(7)      | 120.4    |
| C(8)-C(7)-H(7)      | 120.4    |
| N(2)-C(8)-C(7)      | 122.0(4) |
| N(2)-C(8)-C(9)      | 115.4(4) |
| C(7)-C(8)-C(9)      | 122.5(4) |
| N(4)-C(9)-C(8)      | 113.0(3) |
| N(4)-C(9)-H(9A)     | 109.0    |
| C(8)-C(9)-H(9A)     | 109.0    |
| N(4)-C(9)-H(9B)     | 109.0    |
| C(8)-C(9)-H(9B)     | 109.0    |
| H(9A)-C(9)-H(9B)    | 107.8    |
| N(3)-C(10)-C(11)    | 123.2(4) |
| N(3)-C(10)-H(10)    | 118.4    |
| C(11)-C(10)-H(10)   | 118.4    |
| C(10)-C(11)-C(12)   | 118.3(5) |
| C(10)-C(11)-H(11)   | 120.8    |
| C(12)-C(11)-H(11)   | 120.8    |
| C(11)-C(12)-C(13)   | 119.3(4) |
| C(11)-C(12)-H(12)   | 120.4    |
| C(13)-C(12)-H(12)   | 120.4    |
| C(14)-C(13)-C(12)   | 118.8(4) |
| C(14)-C(13)-H(13)   | 120.6    |
| C(12)-C(13)-H(13)   | 120.6    |
| N(3)-C(14)-C(13)    | 121.9(4) |
| N(3)-C(14)-C(15)    | 115.6(4) |
| C(13)-C(14)-C(15)   | 122.5(4) |
| N(4)-C(15)-C(14)    | 109.4(4) |
| N(4)-C(15)-H(15A)   | 109.8    |
| C(14)-C(15)-H(15A)  | 109.8    |
| N(4)-C(15)-H(15B)   | 109.8    |
| C(14)-C(15)-H(15B)  | 109.8    |
| H(15A)-C(15)-H(15B) | 108.2    |
| N(4)-C(16)-C(17)    | 110.8(3) |
| N(4)-C(16)-H(16A)   | 109.5    |
| C(17)-C(16)-H(16A)  | 109.5    |



|                     |          |
|---------------------|----------|
| N(4)-C(16)-H(16B)   | 109.5    |
| C(17)-C(16)-H(16B)  | 109.5    |
| H(16A)-C(16)-H(16B) | 108.1    |
| C(18)-C(17)-C(22)   | 119.2(4) |
| C(18)-C(17)-C(16)   | 121.9(4) |
| C(22)-C(17)-C(16)   | 118.9(4) |
| C(17)-C(18)-C(19)   | 121.7(4) |
| C(17)-C(18)-H(18)   | 119.1    |
| C(19)-C(18)-H(18)   | 119.1    |
| C(20)-C(19)-C(18)   | 118.2(4) |
| C(20)-C(19)-C(40)   | 122.0(4) |
| C(18)-C(19)-C(40)   | 119.8(4) |
| C(19)-C(20)-C(21)   | 121.9(4) |
| C(19)-C(20)-H(20)   | 119.1    |
| C(21)-C(20)-H(20)   | 119.1    |
| C(20)-C(21)-C(22)   | 118.9(4) |
| C(20)-C(21)-C(23)   | 122.3(4) |
| C(22)-C(21)-C(23)   | 118.8(4) |
| O(3)-C(22)-C(17)    | 119.9(4) |
| O(3)-C(22)-C(21)    | 120.1(4) |
| C(17)-C(22)-C(21)   | 120.0(4) |
| N(5)-C(23)-C(21)    | 111.5(3) |
| N(5)-C(23)-H(23A)   | 109.3    |
| C(21)-C(23)-H(23A)  | 109.3    |
| N(5)-C(23)-H(23B)   | 109.3    |
| C(21)-C(23)-H(23B)  | 109.3    |
| H(23A)-C(23)-H(23B) | 108.0    |
| N(5)-C(24)-C(25)    | 109.3(4) |
| N(5)-C(24)-H(24A)   | 109.8    |
| C(25)-C(24)-H(24A)  | 109.8    |
| N(5)-C(24)-H(24B)   | 109.8    |
| C(25)-C(24)-H(24B)  | 109.8    |
| H(24A)-C(24)-H(24B) | 108.3    |
| N(6)-C(25)-C(26)    | 122.1(5) |
| N(6)-C(25)-C(24)    | 115.0(4) |
| C(26)-C(25)-C(24)   | 122.9(4) |
| C(25)-C(26)-C(27)   | 118.7(5) |
| C(25)-C(26)-H(26)   | 120.6    |
| C(27)-C(26)-H(26)   | 120.6    |
| C(28)-C(27)-C(26)   | 119.6(4) |
| C(28)-C(27)-H(27)   | 120.2    |
| C(26)-C(27)-H(27)   | 120.2    |
| C(27)-C(28)-C(29)   | 118.9(5) |
| C(27)-C(28)-H(28)   | 120.5    |
| C(29)-C(28)-H(28)   | 120.5    |
| N(6)-C(29)-C(28)    | 122.2(4) |

|                     |          |
|---------------------|----------|
| N(6)-C(29)-H(29)    | 118.9    |
| C(28)-C(29)-H(29)   | 118.9    |
| N(5)-C(30)-C(31)    | 112.2(3) |
| N(5)-C(30)-H(30A)   | 109.2    |
| C(31)-C(30)-H(30A)  | 109.2    |
| N(5)-C(30)-H(30B)   | 109.2    |
| C(31)-C(30)-H(30B)  | 109.2    |
| H(30A)-C(30)-H(30B) | 107.9    |
| N(7)-C(31)-C(32)    | 122.7(4) |
| N(7)-C(31)-C(30)    | 114.8(4) |
| C(32)-C(31)-C(30)   | 122.5(4) |
| C(31)-C(32)-C(33)   | 118.3(4) |
| C(31)-C(32)-H(32)   | 120.8    |
| C(33)-C(32)-H(32)   | 120.8    |
| C(34)-C(33)-C(32)   | 119.9(4) |
| C(34)-C(33)-H(33)   | 120.0    |
| C(32)-C(33)-H(33)   | 120.0    |
| C(33)-C(34)-C(35)   | 118.3(4) |
| C(33)-C(34)-H(34)   | 120.8    |
| C(35)-C(34)-H(34)   | 120.8    |
| N(7)-C(35)-C(34)    | 123.1(4) |
| N(7)-C(35)-N(8)     | 118.5(4) |
| C(34)-C(35)-N(8)    | 118.4(4) |
| C(37)-C(36)-C(3)    | 112.4(4) |
| C(37)-C(36)-C(38)   | 110.0(4) |
| C(3)-C(36)-C(38)    | 108.1(4) |
| C(37)-C(36)-C(39)   | 110.8(4) |
| C(3)-C(36)-C(39)    | 106.7(4) |
| C(38)-C(36)-C(39)   | 108.7(4) |
| C(36)-C(37)-H(37A)  | 109.5    |
| C(36)-C(37)-H(37B)  | 109.5    |
| H(37A)-C(37)-H(37B) | 109.5    |
| C(36)-C(37)-H(37C)  | 109.5    |
| H(37A)-C(37)-H(37C) | 109.5    |
| H(37B)-C(37)-H(37C) | 109.5    |
| C(36)-C(38)-H(38A)  | 109.5    |
| C(36)-C(38)-H(38B)  | 109.5    |
| H(38A)-C(38)-H(38B) | 109.5    |
| C(36)-C(38)-H(38C)  | 109.5    |
| H(38A)-C(38)-H(38C) | 109.5    |
| H(38B)-C(38)-H(38C) | 109.5    |
| C(36)-C(39)-H(39A)  | 109.5    |
| C(36)-C(39)-H(39B)  | 109.5    |
| H(39A)-C(39)-H(39B) | 109.5    |
| C(36)-C(39)-H(39C)  | 109.5    |
| H(39A)-C(39)-H(39C) | 109.5    |

|                     |          |
|---------------------|----------|
| H(39B)-C(39)-H(39C) | 109.5    |
| C(19)-C(40)-H(40A)  | 109.5    |
| C(19)-C(40)-H(40B)  | 109.5    |
| H(40A)-C(40)-H(40B) | 109.5    |
| C(19)-C(40)-H(40C)  | 109.5    |
| H(40A)-C(40)-H(40C) | 109.5    |
| H(40B)-C(40)-H(40C) | 109.5    |
| O(5)-C(41)-N(8)     | 123.9(4) |
| O(5)-C(41)-C(42)    | 119.5(4) |
| N(8)-C(41)-C(42)    | 116.6(4) |
| C(44)-C(42)-C(45)   | 111.4(4) |
| C(44)-C(42)-C(41)   | 112.1(4) |
| C(45)-C(42)-C(41)   | 107.8(4) |
| C(44)-C(42)-C(43)   | 110.9(4) |
| C(45)-C(42)-C(43)   | 107.5(4) |
| C(41)-C(42)-C(43)   | 106.9(4) |
| C(42)-C(43)-H(43A)  | 109.5    |
| C(42)-C(43)-H(43B)  | 109.5    |
| H(43A)-C(43)-H(43B) | 109.5    |
| C(42)-C(43)-H(43C)  | 109.5    |
| H(43A)-C(43)-H(43C) | 109.5    |
| H(43B)-C(43)-H(43C) | 109.5    |
| C(42)-C(44)-H(44A)  | 109.5    |
| C(42)-C(44)-H(44B)  | 109.5    |
| H(44A)-C(44)-H(44B) | 109.5    |
| C(42)-C(44)-H(44C)  | 109.5    |
| H(44A)-C(44)-H(44C) | 109.5    |
| H(44B)-C(44)-H(44C) | 109.5    |
| C(42)-C(45)-H(45A)  | 109.5    |
| C(42)-C(45)-H(45B)  | 109.5    |
| H(45A)-C(45)-H(45B) | 109.5    |
| C(42)-C(45)-H(45C)  | 109.5    |
| H(45A)-C(45)-H(45C) | 109.5    |
| H(45B)-C(45)-H(45C) | 109.5    |
| F(2)-C(46)-F(3)     | 107.2(4) |
| F(2)-C(46)-F(1)     | 107.7(4) |
| F(3)-C(46)-F(1)     | 106.9(4) |
| F(2)-C(46)-S(1)     | 111.6(3) |
| F(3)-C(46)-S(1)     | 111.8(3) |
| F(1)-C(46)-S(1)     | 111.5(3) |
| F(4)-C(47)-F(6)     | 107.1(4) |
| F(4)-C(47)-F(5)     | 107.1(3) |
| F(6)-C(47)-F(5)     | 107.2(4) |
| F(4)-C(47)-S(2)     | 111.5(3) |
| F(6)-C(47)-S(2)     | 112.5(3) |
| F(5)-C(47)-S(2)     | 111.2(3) |

|                     |          |
|---------------------|----------|
| Cl(1)-C(48)-Cl(2)   | 111.0(5) |
| Cl(1)-C(48)-H(48A)  | 109.4    |
| Cl(2)-C(48)-H(48A)  | 109.4    |
| Cl(1)-C(48)-H(48B)  | 109.4    |
| Cl(2)-C(48)-H(48B)  | 109.4    |
| H(48A)-C(48)-H(48B) | 108.0    |
| Cl(4)-C(49)-Cl(3)   | 112.9(3) |
| Cl(4)-C(49)-H(49A)  | 109.0    |
| Cl(3)-C(49)-H(49A)  | 109.0    |
| Cl(4)-C(49)-H(49B)  | 109.0    |
| Cl(3)-C(49)-H(49B)  | 109.0    |
| H(49A)-C(49)-H(49B) | 107.8    |
| O(8)-S(1)-O(6)      | 115.2(2) |
| O(8)-S(1)-O(7)      | 114.7(2) |
| O(6)-S(1)-O(7)      | 114.6(3) |
| O(8)-S(1)-C(46)     | 103.8(2) |
| O(6)-S(1)-C(46)     | 103.8(2) |
| O(7)-S(1)-C(46)     | 102.5(2) |
| O(10)-S(2)-O(11)    | 115.9(2) |
| O(10)-S(2)-O(9)     | 113.7(2) |
| O(11)-S(2)-O(9)     | 114.9(2) |
| O(10)-S(2)-C(47)    | 102.4(2) |
| O(11)-S(2)-C(47)    | 104.0(2) |
| O(9)-S(2)-C(47)     | 103.7(2) |

---

Symmetry transformations used to generate equivalent atoms:  
#1 x,y+1,z

**Table S11.** Anisotropic displacement parameters ( $\text{Å}^2 \times 10^3$ ) for **1**. The anisotropic displacement factor exponent takes the form:  $-2 \pi^2 [ h^2 a^{*2} U_{11} + \dots + 2 h k a^* b^* U_{12} ]$

|       | U11   | U22   | U33   | U23   | U13    | U12   |
|-------|-------|-------|-------|-------|--------|-------|
| Fe(1) | 34(1) | 27(1) | 36(1) | 15(1) | 12(1)  | 11(1) |
| Fe(2) | 35(1) | 26(1) | 42(1) | 16(1) | 11(1)  | 11(1) |
| O(1)  | 51(2) | 41(2) | 44(2) | 17(1) | 17(1)  | 10(1) |
| O(2)  | 44(2) | 39(2) | 57(2) | 22(1) | 4(1)   | 2(1)  |
| O(3)  | 38(2) | 29(1) | 40(2) | 15(1) | 7(1)   | 13(1) |
| O(4)  | 36(2) | 35(2) | 44(2) | 10(1) | 14(1)  | 8(1)  |
| O(5)  | 39(2) | 33(2) | 44(2) | 13(1) | 13(1)  | 12(1) |
| O(6)  | 50(2) | 62(2) | 66(2) | 7(2)  | 4(2)   | 21(2) |
| O(7)  | 78(3) | 36(2) | 58(2) | 12(2) | 32(2)  | 2(2)  |
| O(8)  | 51(2) | 48(2) | 52(2) | 15(2) | 19(2)  | 19(2) |
| O(9)  | 67(2) | 53(2) | 42(2) | 11(2) | 22(2)  | -2(2) |
| O(10) | 44(2) | 42(2) | 78(2) | -3(2) | -2(2)  | 22(2) |
| O(11) | 42(2) | 42(2) | 47(2) | 11(1) | 14(1)  | 2(1)  |
| N(1)  | 39(2) | 27(2) | 46(2) | 10(2) | 12(2)  | 11(2) |
| N(2)  | 32(2) | 31(2) | 36(2) | 16(1) | 12(1)  | 11(1) |
| N(3)  | 39(2) | 29(2) | 39(2) | 14(1) | 12(1)  | 13(1) |
| N(4)  | 37(2) | 24(2) | 43(2) | 15(1) | 9(1)   | 8(1)  |
| N(5)  | 42(2) | 28(2) | 38(2) | 12(1) | 9(2)   | 11(1) |
| N(6)  | 46(2) | 29(2) | 51(2) | 18(2) | 10(2)  | 10(2) |
| N(7)  | 34(2) | 30(2) | 36(2) | 14(1) | 9(1)   | 11(1) |
| N(8)  | 39(2) | 25(2) | 44(2) | 9(1)  | 15(2)  | 12(1) |
| C(1)  | 43(3) | 42(3) | 92(4) | 49(3) | -20(2) | -7(2) |
| C(2)  | 46(3) | 65(3) | 56(3) | 24(2) | 17(2)  | 11(2) |
| C(3)  | 37(2) | 31(2) | 37(2) | 12(2) | 8(2)   | 11(2) |
| C(4)  | 36(2) | 34(2) | 38(2) | 14(2) | 11(2)  | 12(2) |
| C(5)  | 42(2) | 45(2) | 38(2) | 9(2)  | 12(2)  | 19(2) |
| C(6)  | 38(2) | 64(3) | 39(2) | 11(2) | 16(2)  | 15(2) |
| C(7)  | 35(2) | 55(3) | 44(2) | 21(2) | 13(2)  | 7(2)  |
| C(8)  | 39(2) | 40(2) | 37(2) | 19(2) | 9(2)   | 10(2) |
| C(9)  | 38(2) | 32(2) | 48(2) | 19(2) | 11(2)  | 7(2)  |
| C(10) | 38(2) | 35(2) | 43(2) | 15(2) | 14(2)  | 7(2)  |
| C(11) | 38(2) | 45(3) | 57(3) | 22(2) | 8(2)   | 17(2) |
| C(12) | 47(3) | 41(2) | 68(3) | 27(2) | 9(2)   | 18(2) |
| C(13) | 44(2) | 31(2) | 58(3) | 21(2) | 7(2)   | 11(2) |
| C(14) | 40(2) | 34(2) | 45(2) | 16(2) | 10(2)  | 12(2) |
| C(15) | 44(2) | 23(2) | 54(3) | 12(2) | 4(2)   | 10(2) |
| C(16) | 35(2) | 27(2) | 45(2) | 12(2) | 2(2)   | 8(2)  |
| C(17) | 41(2) | 30(2) | 41(2) | 12(2) | 6(2)   | 12(2) |

|       |        |        |        |       |       |       |
|-------|--------|--------|--------|-------|-------|-------|
| C(18) | 38(2)  | 35(2)  | 41(2)  | 13(2) | 7(2)  | 9(2)  |
| C(19) | 44(2)  | 41(2)  | 39(2)  | 14(2) | 10(2) | 15(2) |
| C(20) | 46(2)  | 38(2)  | 36(2)  | 12(2) | 11(2) | 21(2) |
| C(21) | 42(2)  | 31(2)  | 37(2)  | 12(2) | 9(2)  | 14(2) |
| C(22) | 40(2)  | 32(2)  | 34(2)  | 13(2) | 9(2)  | 14(2) |
| C(23) | 47(2)  | 31(2)  | 41(2)  | 10(2) | 8(2)  | 17(2) |
| C(24) | 55(3)  | 23(2)  | 54(3)  | 14(2) | 10(2) | 12(2) |
| C(25) | 40(2)  | 30(2)  | 56(3)  | 18(2) | 9(2)  | 9(2)  |
| C(26) | 50(3)  | 38(2)  | 75(3)  | 32(2) | 18(2) | 12(2) |
| C(27) | 54(3)  | 47(3)  | 73(3)  | 41(3) | 20(3) | 13(2) |
| C(28) | 60(3)  | 54(3)  | 61(3)  | 33(2) | 25(2) | 18(2) |
| C(29) | 50(3)  | 38(2)  | 54(3)  | 23(2) | 18(2) | 16(2) |
| C(30) | 41(2)  | 35(2)  | 41(2)  | 16(2) | 11(2) | 17(2) |
| C(31) | 37(2)  | 38(2)  | 37(2)  | 14(2) | 13(2) | 17(2) |
| C(32) | 40(2)  | 42(2)  | 41(2)  | 9(2)  | 10(2) | 15(2) |
| C(33) | 35(2)  | 51(3)  | 50(3)  | 11(2) | 8(2)  | 8(2)  |
| C(34) | 42(2)  | 35(2)  | 47(2)  | 9(2)  | 10(2) | 11(2) |
| C(35) | 39(2)  | 30(2)  | 34(2)  | 11(2) | 10(2) | 9(2)  |
| C(36) | 40(2)  | 30(2)  | 50(2)  | 16(2) | 11(2) | 9(2)  |
| C(37) | 50(3)  | 46(3)  | 55(3)  | 9(2)  | 6(2)  | 5(2)  |
| C(38) | 43(3)  | 39(2)  | 84(4)  | 17(2) | 20(2) | 8(2)  |
| C(39) | 68(3)  | 34(2)  | 49(3)  | 18(2) | 5(2)  | 5(2)  |
| C(40) | 51(3)  | 52(3)  | 51(3)  | 17(2) | 18(2) | 19(2) |
| C(41) | 39(2)  | 31(2)  | 40(2)  | 16(2) | 13(2) | 14(2) |
| C(42) | 42(2)  | 30(2)  | 61(3)  | 13(2) | 20(2) | 16(2) |
| C(43) | 46(2)  | 33(2)  | 63(3)  | 13(2) | 8(2)  | 14(2) |
| C(44) | 56(3)  | 51(3)  | 49(3)  | 11(2) | 15(2) | 19(2) |
| C(45) | 49(3)  | 41(3)  | 74(3)  | 15(2) | 26(2) | 14(2) |
| C(46) | 53(3)  | 40(2)  | 45(2)  | 21(2) | 10(2) | 10(2) |
| C(47) | 39(2)  | 41(2)  | 40(2)  | 16(2) | 9(2)  | 17(2) |
| C(48) | 75(5)  | 156(8) | 67(4)  | 22(5) | 23(4) | 38(5) |
| C(49) | 60(3)  | 65(3)  | 58(3)  | 14(3) | 16(3) | 22(3) |
| S(1)  | 47(1)  | 37(1)  | 46(1)  | 11(1) | 16(1) | 11(1) |
| S(2)  | 40(1)  | 35(1)  | 44(1)  | 8(1)  | 14(1) | 10(1) |
| Cl(1) | 114(2) | 104(2) | 116(2) | 24(1) | -1(1) | -2(1) |
| Cl(2) | 74(1)  | 109(1) | 73(1)  | 15(1) | 16(1) | 11(1) |
| Cl(3) | 86(1)  | 63(1)  | 62(1)  | 5(1)  | 8(1)  | 29(1) |
| Cl(4) | 86(1)  | 54(1)  | 83(1)  | 12(1) | 44(1) | 3(1)  |
| F(1)  | 73(2)  | 41(2)  | 61(2)  | 7(1)  | 20(2) | 14(1) |
| F(2)  | 64(2)  | 51(2)  | 56(2)  | 22(1) | -3(1) | 10(1) |
| F(3)  | 65(2)  | 46(2)  | 61(2)  | 32(1) | 10(1) | 9(1)  |
| F(4)  | 56(2)  | 49(2)  | 62(2)  | 16(1) | 9(1)  | 30(1) |
| F(5)  | 58(2)  | 45(1)  | 41(1)  | 12(1) | 13(1) | 15(1) |
| F(6)  | 51(2)  | 33(1)  | 55(2)  | 12(1) | 10(1) | 7(1)  |

---

**Table S12.** Hydrogen coordinates ( $\times 10^4$ ) and isotropic displacement parameters ( $\text{\AA}^2 \times 10^3$ ) for **1**.

|        | x        | y        | z        | U(eq) |
|--------|----------|----------|----------|-------|
| H(1N)  | 1500(40) | 3980(40) | 5670(30) | 43    |
| H(8N)  | 3710(40) | 9100(40) | 9270(30) | 41    |
| H(2A)  | -1324    | 6708     | 8377     | 81    |
| H(2B)  | -1358    | 5375     | 8196     | 81    |
| H(2C)  | -1584    | 6037     | 7622     | 81    |
| H(5)   | 3010     | 4322     | 5021     | 48    |
| H(6)   | 4413     | 5710     | 4761     | 55    |
| H(7)   | 4477     | 7600     | 5264     | 52    |
| H(9A)  | 3918     | 8937     | 6198     | 45    |
| H(9B)  | 2652     | 8821     | 5939     | 45    |
| H(10)  | -723     | 7234     | 6128     | 45    |
| H(11)  | -1594    | 8586     | 5805     | 52    |
| H(12)  | -688     | 10478    | 6050     | 58    |
| H(13)  | 1063     | 10945    | 6638     | 51    |
| H(15A) | 2740     | 10239    | 6977     | 47    |
| H(15B) | 2178     | 9697     | 7566     | 47    |
| H(16A) | 3551     | 8737     | 7815     | 42    |
| H(16B) | 4355     | 9316     | 7327     | 42    |
| H(18)  | 5796     | 8344     | 6933     | 45    |
| H(20)  | 5491     | 4977     | 6735     | 45    |
| H(23A) | 2757     | 4330     | 6953     | 45    |
| H(23B) | 3886     | 3877     | 7061     | 45    |
| H(24A) | 3068     | 2897     | 7978     | 51    |
| H(24B) | 1961     | 3255     | 7718     | 51    |
| H(26)  | 2379     | 2158     | 8960     | 61    |
| H(27)  | 1735     | 2551     | 10039    | 64    |
| H(28)  | 1191     | 4274     | 10423    | 65    |
| H(29)  | 1380     | 5618     | 9752     | 53    |
| H(30A) | 4897     | 4480     | 8079     | 44    |
| H(30B) | 4229     | 4496     | 8741     | 44    |
| H(32)  | 6394     | 6092     | 8450     | 48    |
| H(33)  | 6905     | 8057     | 8785     | 54    |
| H(34)  | 5548     | 9142     | 9115     | 49    |
| H(37A) | -535     | 3279     | 5031     | 76    |
| H(37B) | -1114    | 2274     | 5366     | 76    |
| H(37C) | 209      | 2538     | 5346     | 76    |
| H(38A) | -1730    | 4417     | 5838     | 81    |
| H(38B) | -1466    | 4563     | 6623     | 81    |
| H(38C) | -2084    | 3374     | 6195     | 81    |

|        |      |       |       |     |
|--------|------|-------|-------|-----|
| H(39A) | -627 | 2474  | 6648  | 74  |
| H(39B) | 13   | 3675  | 7048  | 74  |
| H(39C) | 656  | 2881  | 6539  | 74  |
| H(40A) | 6955 | 6978  | 6091  | 73  |
| H(40B) | 7184 | 5993  | 6454  | 73  |
| H(40C) | 7497 | 7281  | 6838  | 73  |
| H(43A) | 1039 | 10244 | 9116  | 69  |
| H(43B) | 1119 | 9142  | 8568  | 69  |
| H(43C) | 2214 | 10052 | 8836  | 69  |
| H(44A) | 1813 | 10349 | 10328 | 76  |
| H(44B) | 2966 | 10290 | 9984  | 76  |
| H(44C) | 2518 | 9411  | 10440 | 76  |
| H(45A) | 655  | 8011  | 10019 | 80  |
| H(45B) | 173  | 7966  | 9279  | 80  |
| H(45C) | 110  | 9031  | 9860  | 80  |
| H(48A) | 8198 | 716   | 7450  | 116 |
| H(48B) | 7700 | 755   | 8168  | 116 |
| H(49A) | 4739 | 8318  | 2606  | 71  |
| H(49B) | 4920 | 7823  | 3259  | 71  |

---



**Table S13.** Torsion angles [deg] for **1**.

---

|                         |           |
|-------------------------|-----------|
| Fe(1)-O(1)-C(1)-O(2)    | 36.9(7)   |
| Fe(1)-O(1)-C(1)-C(2)    | -132.9(5) |
| Fe(2)-O(2)-C(1)-O(1)    | 40.4(7)   |
| Fe(2)-O(2)-C(1)-C(2)    | -149.7(4) |
| Fe(1)-O(4)-C(3)-N(1)    | -31.2(6)  |
| Fe(1)-O(4)-C(3)-C(36)   | 147.1(3)  |
| C(4)-N(1)-C(3)-O(4)     | -12.2(7)  |
| C(4)-N(1)-C(3)-C(36)    | 169.6(4)  |
| C(8)-N(2)-C(4)-C(5)     | 0.8(6)    |
| Fe(1)-N(2)-C(4)-C(5)    | -161.9(3) |
| C(8)-N(2)-C(4)-N(1)     | -178.1(4) |
| Fe(1)-N(2)-C(4)-N(1)    | 19.2(6)   |
| C(3)-N(1)-C(4)-N(2)     | 17.7(7)   |
| C(3)-N(1)-C(4)-C(5)     | -161.2(4) |
| N(2)-C(4)-C(5)-C(6)     | -1.4(7)   |
| N(1)-C(4)-C(5)-C(6)     | 177.4(4)  |
| C(4)-C(5)-C(6)-C(7)     | 0.0(7)    |
| C(5)-C(6)-C(7)-C(8)     | 1.8(7)    |
| C(4)-N(2)-C(8)-C(7)     | 1.2(6)    |
| Fe(1)-N(2)-C(8)-C(7)    | 165.5(4)  |
| C(4)-N(2)-C(8)-C(9)     | 179.1(4)  |
| Fe(1)-N(2)-C(8)-C(9)    | -16.6(5)  |
| C(6)-C(7)-C(8)-N(2)     | -2.6(7)   |
| C(6)-C(7)-C(8)-C(9)     | 179.7(4)  |
| C(15)-N(4)-C(9)-C(8)    | -150.2(4) |
| C(16)-N(4)-C(9)-C(8)    | 87.2(4)   |
| Fe(1)-N(4)-C(9)-C(8)    | -35.5(4)  |
| N(2)-C(8)-C(9)-N(4)     | 36.2(5)   |
| C(7)-C(8)-C(9)-N(4)     | -146.0(4) |
| C(14)-N(3)-C(10)-C(11)  | 1.1(6)    |
| Fe(1)-N(3)-C(10)-C(11)  | 178.3(3)  |
| N(3)-C(10)-C(11)-C(12)  | -0.1(7)   |
| C(10)-C(11)-C(12)-C(13) | -0.8(7)   |
| C(11)-C(12)-C(13)-C(14) | 0.7(7)    |
| C(10)-N(3)-C(14)-C(13)  | -1.2(6)   |
| Fe(1)-N(3)-C(14)-C(13)  | -178.7(3) |
| C(10)-N(3)-C(14)-C(15)  | 179.0(4)  |
| Fe(1)-N(3)-C(14)-C(15)  | 1.5(5)    |
| C(12)-C(13)-C(14)-N(3)  | 0.3(7)    |
| C(12)-C(13)-C(14)-C(15) | -179.9(4) |
| C(9)-N(4)-C(15)-C(14)   | 70.4(4)   |
| C(16)-N(4)-C(15)-C(14)  | -166.7(3) |
| Fe(1)-N(4)-C(15)-C(14)  | -45.4(4)  |
| N(3)-C(14)-C(15)-N(4)   | 31.0(5)   |

|                         |           |
|-------------------------|-----------|
| C(13)-C(14)-C(15)-N(4)  | -148.8(4) |
| C(9)-N(4)-C(16)-C(17)   | -61.8(4)  |
| C(15)-N(4)-C(16)-C(17)  | 175.6(3)  |
| Fe(1)-N(4)-C(16)-C(17)  | 58.2(4)   |
| N(4)-C(16)-C(17)-C(18)  | 114.3(4)  |
| N(4)-C(16)-C(17)-C(22)  | -64.7(5)  |
| C(22)-C(17)-C(18)-C(19) | 1.7(7)    |
| C(16)-C(17)-C(18)-C(19) | -177.2(4) |
| C(17)-C(18)-C(19)-C(20) | -2.1(7)   |
| C(17)-C(18)-C(19)-C(40) | 177.7(4)  |
| C(18)-C(19)-C(20)-C(21) | 0.2(7)    |
| C(40)-C(19)-C(20)-C(21) | -179.6(4) |
| C(19)-C(20)-C(21)-C(22) | 2.0(7)    |
| C(19)-C(20)-C(21)-C(23) | -176.0(4) |
| Fe(1)-O(3)-C(22)-C(17)  | 59.4(5)   |
| Fe(2)-O(3)-C(22)-C(17)  | -121.8(4) |
| Fe(1)-O(3)-C(22)-C(21)  | -120.0(4) |
| Fe(2)-O(3)-C(22)-C(21)  | 58.9(5)   |
| C(18)-C(17)-C(22)-O(3)  | -178.8(4) |
| C(16)-C(17)-C(22)-O(3)  | 0.1(6)    |
| C(18)-C(17)-C(22)-C(21) | 0.5(6)    |
| C(16)-C(17)-C(22)-C(21) | 179.5(4)  |
| C(20)-C(21)-C(22)-O(3)  | 177.0(4)  |
| C(23)-C(21)-C(22)-O(3)  | -4.9(6)   |
| C(20)-C(21)-C(22)-C(17) | -2.3(6)   |
| C(23)-C(21)-C(22)-C(17) | 175.7(4)  |
| C(30)-N(5)-C(23)-C(21)  | -58.5(4)  |
| C(24)-N(5)-C(23)-C(21)  | 179.2(4)  |
| Fe(2)-N(5)-C(23)-C(21)  | 62.1(4)   |
| C(20)-C(21)-C(23)-N(5)  | 116.1(4)  |
| C(22)-C(21)-C(23)-N(5)  | -61.9(5)  |
| C(30)-N(5)-C(24)-C(25)  | 68.8(5)   |
| C(23)-N(5)-C(24)-C(25)  | -168.5(4) |
| Fe(2)-N(5)-C(24)-C(25)  | -47.5(4)  |
| C(29)-N(6)-C(25)-C(26)  | -2.4(7)   |
| Fe(2)-N(6)-C(25)-C(26)  | 174.1(4)  |
| C(29)-N(6)-C(25)-C(24)  | 178.6(4)  |
| Fe(2)-N(6)-C(25)-C(24)  | -4.9(5)   |
| N(5)-C(24)-C(25)-N(6)   | 36.4(6)   |
| N(5)-C(24)-C(25)-C(26)  | -142.6(5) |
| N(6)-C(25)-C(26)-C(27)  | 2.0(8)    |
| C(24)-C(25)-C(26)-C(27) | -179.1(5) |
| C(25)-C(26)-C(27)-C(28) | 0.2(8)    |
| C(26)-C(27)-C(28)-C(29) | -1.8(9)   |
| C(25)-N(6)-C(29)-C(28)  | 0.7(7)    |
| Fe(2)-N(6)-C(29)-C(28)  | -175.4(4) |

|                         |           |
|-------------------------|-----------|
| C(27)-C(28)-C(29)-N(6)  | 1.4(8)    |
| C(24)-N(5)-C(30)-C(31)  | -149.2(3) |
| C(23)-N(5)-C(30)-C(31)  | 87.9(4)   |
| Fe(2)-N(5)-C(30)-C(31)  | -34.8(4)  |
| C(35)-N(7)-C(31)-C(32)  | 0.0(6)    |
| Fe(2)-N(7)-C(31)-C(32)  | 158.1(4)  |
| C(35)-N(7)-C(31)-C(30)  | 178.4(4)  |
| Fe(2)-N(7)-C(31)-C(30)  | -23.5(4)  |
| N(5)-C(30)-C(31)-N(7)   | 40.1(5)   |
| N(5)-C(30)-C(31)-C(32)  | -141.4(4) |
| N(7)-C(31)-C(32)-C(33)  | -1.3(7)   |
| C(30)-C(31)-C(32)-C(33) | -179.6(4) |
| C(31)-C(32)-C(33)-C(34) | 1.7(7)    |
| C(32)-C(33)-C(34)-C(35) | -0.8(7)   |
| C(31)-N(7)-C(35)-C(34)  | 1.1(6)    |
| Fe(2)-N(7)-C(35)-C(34)  | -154.9(3) |
| C(31)-N(7)-C(35)-N(8)   | -179.2(4) |
| Fe(2)-N(7)-C(35)-N(8)   | 24.8(5)   |
| C(33)-C(34)-C(35)-N(7)  | -0.6(7)   |
| C(33)-C(34)-C(35)-N(8)  | 179.6(4)  |
| C(41)-N(8)-C(35)-N(7)   | 7.7(7)    |
| C(41)-N(8)-C(35)-C(34)  | -172.6(4) |
| O(4)-C(3)-C(36)-C(37)   | 140.5(4)  |
| N(1)-C(3)-C(36)-C(37)   | -41.2(6)  |
| O(4)-C(3)-C(36)-C(38)   | 18.9(6)   |
| N(1)-C(3)-C(36)-C(38)   | -162.8(4) |
| O(4)-C(3)-C(36)-C(39)   | -97.9(5)  |
| N(1)-C(3)-C(36)-C(39)   | 80.4(5)   |
| Fe(2)-O(5)-C(41)-N(8)   | -28.4(6)  |
| Fe(2)-O(5)-C(41)-C(42)  | 150.1(3)  |
| C(35)-N(8)-C(41)-O(5)   | -7.5(7)   |
| C(35)-N(8)-C(41)-C(42)  | 174.0(4)  |
| O(5)-C(41)-C(42)-C(44)  | 134.5(4)  |
| N(8)-C(41)-C(42)-C(44)  | -46.9(5)  |
| O(5)-C(41)-C(42)-C(45)  | 11.5(6)   |
| N(8)-C(41)-C(42)-C(45)  | -169.9(4) |
| O(5)-C(41)-C(42)-C(43)  | -103.8(5) |
| N(8)-C(41)-C(42)-C(43)  | 74.8(5)   |
| F(2)-C(46)-S(1)-O(8)    | -55.1(4)  |
| F(3)-C(46)-S(1)-O(8)    | 64.9(4)   |
| F(1)-C(46)-S(1)-O(8)    | -175.5(3) |
| F(2)-C(46)-S(1)-O(6)    | -175.8(3) |
| F(3)-C(46)-S(1)-O(6)    | -55.9(4)  |
| F(1)-C(46)-S(1)-O(6)    | 63.7(4)   |
| F(2)-C(46)-S(1)-O(7)    | 64.6(4)   |
| F(3)-C(46)-S(1)-O(7)    | -175.4(4) |

|                       |           |
|-----------------------|-----------|
| F(1)-C(46)-S(1)-O(7)  | -55.8(4)  |
| F(4)-C(47)-S(2)-O(10) | -177.5(3) |
| F(6)-C(47)-S(2)-O(10) | -57.2(4)  |
| F(5)-C(47)-S(2)-O(10) | 63.1(3)   |
| F(4)-C(47)-S(2)-O(11) | 61.5(3)   |
| F(6)-C(47)-S(2)-O(11) | -178.2(3) |
| F(5)-C(47)-S(2)-O(11) | -58.0(3)  |
| F(4)-C(47)-S(2)-O(9)  | -59.0(4)  |
| F(6)-C(47)-S(2)-O(9)  | 61.3(4)   |
| F(5)-C(47)-S(2)-O(9)  | -178.5(3) |

---

**Table S14.** Hydrogen bonds for **1** [Å and deg.].

---

| D-H...A             | d(D-H)  | d(H...A) | d(D...A) | <(DHA) |
|---------------------|---------|----------|----------|--------|
| N(1)-H(1N)...O(10)  | 0.79(4) | 2.13(4)  | 2.884(5) | 159(5) |
| N(8)-H(8N)...O(7)#1 | 0.79(4) | 2.16(4)  | 2.921(5) | 163(5) |

---

Symmetry transformations used to generate equivalent atoms:

#1 x,y+1,z

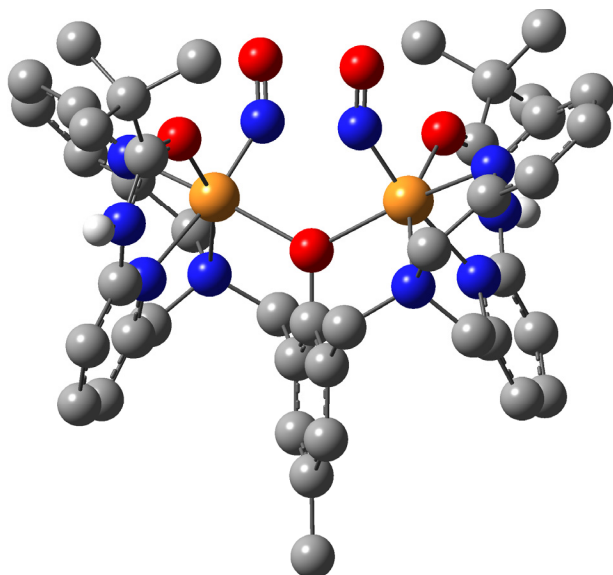

**Figure S25.** DFT-optimized structure of  $0(\text{NO})_2$  using BP86/TZVP with hydrogen atoms (except for amide N-H groups) omitted for clarity.

**Table S15.** DFT-optimized coordinates (Å) of  $0(\text{NO})_2$  using BP86/TZVP.

|    | X         | Y         | Z         |
|----|-----------|-----------|-----------|
| Fe | 1.834685  | -0.399305 | -0.466709 |
| Fe | -1.836122 | -0.39619  | 0.470844  |
| O  | 0.000932  | 0.571816  | 0.002757  |
| O  | 2.288433  | -1.57514  | 1.181601  |
| O  | -2.2874   | -1.579403 | -1.173365 |
| N  | 3.188617  | -0.082051 | 2.712337  |
| H  | 3.531481  | 0.001948  | 3.673014  |
| N  | 3.043971  | 1.056911  | 0.58998   |
| N  | 3.528075  | -1.13819  | -1.592349 |
| N  | 2.112942  | 1.10028   | -2.084708 |
| N  | -2.117741 | 1.111649  | 2.080665  |
| N  | -3.532419 | -1.128681 | 1.595863  |
| N  | -3.040254 | 1.056527  | -0.596697 |
| N  | -3.18176  | -0.092639 | -2.713622 |
| H  | -3.52292  | -0.013012 | -3.67527  |
| C  | 2.779194  | -1.338898 | 2.349279  |
| C  | 3.355141  | 1.08072   | 1.92277   |
| C  | 3.909667  | 2.216117  | 2.553622  |
| H  | 4.144801  | 2.19554   | 3.621359  |

|   |           |           |           |
|---|-----------|-----------|-----------|
| C | 4.174193  | 3.35586   | 1.78547   |
| H | 4.603452  | 4.24598   | 2.251471  |
| C | 3.907864  | 3.326357  | 0.404104  |
| H | 4.138221  | 4.187044  | -0.227636 |
| C | 3.358935  | 2.166939  | -0.16314  |
| C | 3.226821  | 2.026892  | -1.662172 |
| H | 3.103171  | 3.018475  | -2.134868 |
| H | 4.176226  | 1.60314   | -2.040624 |
| C | 4.421411  | -2.07182  | -1.149721 |
| H | 4.293549  | -2.414294 | -0.122111 |
| C | 5.434723  | -2.576366 | -1.978923 |
| H | 6.131885  | -3.322925 | -1.592833 |
| C | 5.532656  | -2.106892 | -3.302386 |
| H | 6.314499  | -2.480588 | -3.968178 |
| C | 4.609051  | -1.146619 | -3.760009 |
| H | 4.660934  | -0.763838 | -4.78278  |
| C | 3.610067  | -0.687943 | -2.88638  |
| C | 2.53363   | 0.297052  | -3.290132 |
| H | 2.882461  | 0.955291  | -4.11001  |
| H | 1.637583  | -0.240547 | -3.65354  |
| C | 0.837493  | 1.880509  | -2.370418 |
| H | 0.078608  | 1.129717  | -2.65541  |
| H | 1.011281  | 2.551129  | -3.235618 |
| C | 0.396941  | 2.672695  | -1.164272 |
| C | 0.381308  | 4.083584  | -1.15591  |
| H | 0.670767  | 4.625939  | -2.06392  |
| C | -0.005279 | 4.819466  | -0.010792 |
| C | -0.39194  | 4.089547  | 1.138997  |
| H | -0.691703 | 4.636661  | 2.040943  |
| C | -0.397798 | 2.679189  | 1.157998  |
| C | 0.001706  | 1.968136  | -0.000765 |
| C | -0.843115 | 1.89326   | 2.366483  |
| H | -0.085155 | 1.144045  | 2.657844  |
| H | -1.019837 | 2.568364  | 3.227571  |
| C | -2.54239  | 0.315004  | 3.289058  |
| H | -2.893479 | 0.977765  | 4.104315  |
| H | -1.647653 | -0.220907 | 3.658132  |
| C | -3.61793  | -0.671742 | 2.887322  |
| C | -4.619466 | -1.125677 | 3.760508  |
| H | -4.674089 | -0.737604 | 4.781138  |

|   |           |           |           |
|---|-----------|-----------|-----------|
| C | -5.542025 | -2.08808  | 3.305283  |
| H | -6.325832 | -2.458127 | 3.970804  |
| C | -5.440466 | -2.564444 | 1.984558  |
| H | -6.136709 | -3.312848 | 1.600387  |
| C | -4.424713 | -2.064441 | 1.155601  |
| H | -4.294023 | -2.412277 | 0.130157  |
| C | -3.229948 | 2.036524  | 1.649983  |
| H | -3.108909 | 3.029699  | 2.120006  |
| H | -4.180932 | 1.613577  | 2.025337  |
| C | -3.354808 | 2.171146  | 0.149911  |
| C | -3.897114 | 3.329814  | -0.425074 |
| H | -4.12671  | 4.194541  | 0.201336  |
| C | -4.157481 | 3.353734  | -1.807694 |
| H | -4.58093  | 4.243477  | -2.279661 |
| C | -3.894501 | 2.209174  | -2.569182 |
| H | -4.125654 | 2.18418   | -3.637702 |
| C | -3.346516 | 1.07488   | -1.930672 |
| C | 2.945617  | -2.482262 | 3.364137  |
| C | 3.552863  | -2.013139 | 4.71154   |
| H | 4.57648   | -1.607402 | 4.60077   |
| H | 3.638813  | -2.883475 | 5.382771  |
| H | 2.909198  | -1.281852 | 5.238473  |
| C | 3.891573  | -3.539467 | 2.705899  |
| H | 4.894781  | -3.120289 | 2.509163  |
| H | 3.460238  | -3.923118 | 1.766801  |
| H | 4.012984  | -4.387666 | 3.400452  |
| C | 1.548375  | -3.127103 | 3.609703  |
| H | 1.670276  | -3.996679 | 4.277095  |
| H | 1.098448  | -3.471688 | 2.666147  |
| H | 0.858552  | -2.41719  | 4.101142  |
| C | 0.010717  | 6.334992  | -0.008495 |
| H | 0.955134  | 6.726681  | 0.41505   |
| H | -0.808648 | 6.751666  | 0.601435  |
| H | -0.083155 | 6.744912  | -1.027643 |
| C | -2.776113 | -1.348444 | -2.342994 |
| C | -2.943769 | -2.496882 | -3.351998 |
| C | -1.547253 | -3.144737 | -3.593778 |
| H | -1.669979 | -4.017318 | -4.257086 |
| H | -1.098248 | -3.485377 | -2.648358 |
| H | -0.856267 | -2.438057 | -4.088274 |

|   |           |           |           |
|---|-----------|-----------|-----------|
| C | -3.549859 | -2.033899 | -4.702042 |
| H | -3.637054 | -2.907638 | -5.368679 |
| H | -2.904817 | -1.306537 | -5.232734 |
| H | -4.572789 | -1.625814 | -4.593676 |
| C | -3.891298 | -3.549537 | -2.688857 |
| H | -4.894187 | -3.128235 | -2.495058 |
| H | -3.461016 | -3.928693 | -1.747456 |
| H | -4.013158 | -4.401276 | -3.378977 |
| N | -0.980232 | -1.749878 | 1.156968  |
| O | -1.058632 | -2.943128 | 1.360937  |
| N | 0.976418  | -1.755716 | -1.144538 |
| O | 1.053805  | -2.950183 | -1.341723 |

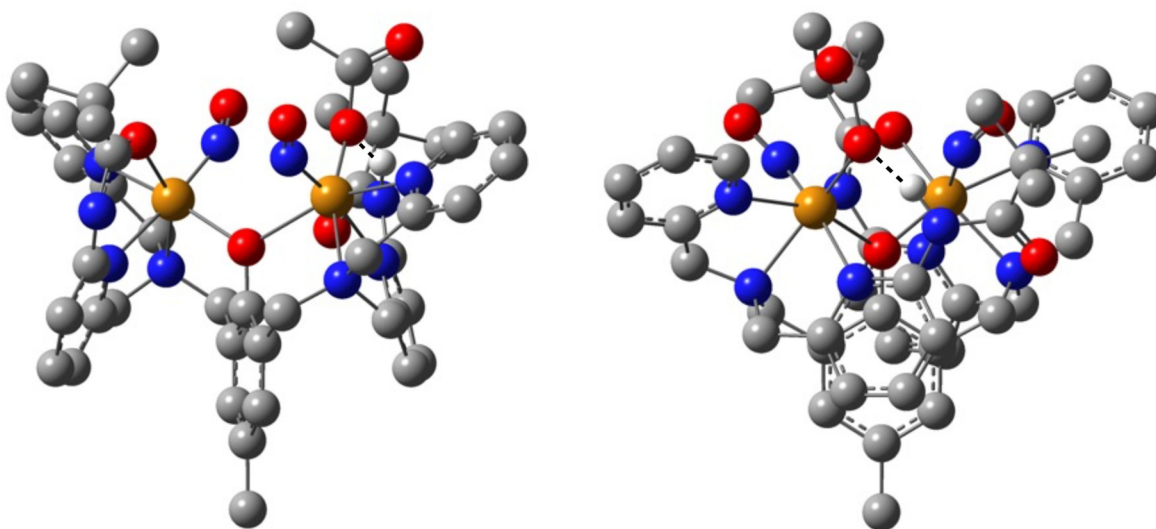

**Figure S26.** DFT-optimized structure of **1(NO)<sub>2</sub>** using BP86/TZVP with hydrogen atoms (except for the hydrogen bonding amide N-H group) omitted for clarity. Hydrogen bonds are shown with dashed lines. The structure is shown in two different orientations for clarity.

**Table S16.** DFT-optimized coordinates (Å) of **1(NO)<sub>2</sub>** using BP86/TZVP.

|    | X           | Y           | Z           |
|----|-------------|-------------|-------------|
| Fe | -1.89043600 | -0.69640300 | -0.55018600 |
| Fe | 1.87933800  | 0.25664400  | -0.28445600 |
| O  | 0.12868000  | -0.43871800 | 0.63493800  |
| O  | -0.79270600 | 4.17093500  | 1.16315400  |
| O  | 2.32163800  | -1.12132600 | -1.86475800 |
| N  | -2.23939200 | 2.68479900  | 0.18151200  |
| H  | -2.40378700 | 2.22320400  | -0.72953800 |
| N  | -2.64685300 | 0.56743300  | 1.14355200  |



|   |             |             |             |
|---|-------------|-------------|-------------|
| N | -3.90585000 | -1.45495100 | -1.08457100 |
| N | -2.39736400 | -2.25573200 | 0.98442000  |
| N | 2.35858000  | 1.46143800  | 1.50298500  |
| N | 3.68098100  | 1.45418800  | -0.82275300 |
| N | 3.04081700  | -1.19029000 | 0.86251100  |
| N | 2.86864800  | -3.00737500 | -0.67282900 |
| H | 3.04175600  | -4.00654300 | -0.78461300 |
| C | -1.52635500 | 3.89705300  | 0.21175600  |
| C | -2.51523700 | 1.91413400  | 1.30746300  |
| C | -2.74087000 | 2.53608600  | 2.55440900  |
| H | -2.62566100 | 3.61391200  | 2.64160600  |
| C | -3.12190800 | 1.76436600  | 3.63903400  |
| H | -3.31684500 | 2.23487100  | 4.60446100  |
| C | -3.27871100 | 0.38399200  | 3.47390500  |
| H | -3.58680000 | -0.25435600 | 4.30251100  |
| C | -3.03681800 | -0.16918700 | 2.22144300  |
| C | -3.30303700 | -1.63614100 | 1.99175700  |
| H | -3.25675900 | -2.18506100 | 2.94701000  |
| H | -4.33269400 | -1.73591800 | 1.61308400  |
| C | -4.80762500 | -0.81308400 | -1.85785300 |
| H | -4.52488800 | 0.17976900  | -2.21630800 |
| C | -6.02273500 | -1.40171800 | -2.21414900 |
| H | -6.72053300 | -0.84974300 | -2.84456600 |
| C | -6.31598600 | -2.68647100 | -1.75421500 |
| H | -7.25850000 | -3.17074400 | -2.01604000 |
| C | -5.38683700 | -3.34271200 | -0.94063700 |
| H | -5.58939700 | -4.34064800 | -0.54704800 |
| C | -4.18953900 | -2.69786600 | -0.62855100 |
| C | -3.12680300 | -3.32042800 | 0.24787300  |
| H | -3.57769900 | -4.04950500 | 0.94566100  |
| H | -2.39810600 | -3.87261700 | -0.36744600 |
| C | -1.14950600 | -2.82351900 | 1.59963000  |
| H | -0.50302200 | -3.12178700 | 0.75849400  |
| H | -1.41176100 | -3.73226200 | 2.17209600  |
| C | -0.46057900 | -1.84347000 | 2.50662400  |
| C | -0.43146000 | -2.07233400 | 3.88915200  |
| H | -0.85735700 | -3.00514600 | 4.27309900  |
| C | 0.11094800  | -1.14909800 | 4.79482000  |
| C | 0.61857400  | 0.04177400  | 4.25576200  |
| H | 1.01549400  | 0.80468500  | 4.93344800  |
| C | 0.62700300  | 0.30193700  | 2.87862400  |
| C | 0.10846000  | -0.65948800 | 1.97143400  |
| C | 1.14066900  | 1.61871600  | 2.36652600  |
| H | 0.38426400  | 2.14792400  | 1.76595700  |
| H | 1.39289700  | 2.27494200  | 3.21918200  |
| C | 2.83244300  | 2.78437900  | 1.01984300  |

|   |             |             |             |
|---|-------------|-------------|-------------|
| H | 3.28188600  | 3.37243800  | 1.84027900  |
| H | 1.95368200  | 3.35124300  | 0.66943900  |
| C | 3.82454600  | 2.59346600  | -0.10544800 |
| C | 4.81764000  | 3.52985700  | -0.40565100 |
| H | 4.91563000  | 4.43362900  | 0.19867600  |
| C | 5.67144100  | 3.29094900  | -1.48502100 |
| H | 6.45083800  | 4.01054200  | -1.74174800 |
| C | 5.51489600  | 2.11638000  | -2.22695900 |
| H | 6.16159700  | 1.89173900  | -3.07574900 |
| C | 4.50743300  | 1.22440300  | -1.86392900 |
| H | 4.33377400  | 0.29858500  | -2.41405100 |
| C | 3.45002400  | 0.76565700  | 2.24462300  |
| H | 3.42602200  | 1.04158400  | 3.31173600  |
| H | 4.41301200  | 1.11775400  | 1.83990600  |
| C | 3.42183800  | -0.73334100 | 2.08458300  |
| C | 3.87635700  | -1.58171000 | 3.09308200  |
| H | 4.16580100  | -1.17433200 | 4.06201400  |
| C | 3.94564200  | -2.95381700 | 2.83836300  |
| H | 4.29014500  | -3.64570000 | 3.60862300  |
| C | 3.58986500  | -3.42929800 | 1.58143900  |
| H | 3.66172800  | -4.49196300 | 1.34224600  |
| C | 3.14909700  | -2.51054300 | 0.61430300  |
| C | -1.80126600 | 4.89464700  | -0.92890100 |
| C | -2.19924900 | 4.23389300  | -2.25970500 |
| H | -1.39475800 | 3.59392600  | -2.65169800 |
| H | -2.38461000 | 5.01772500  | -3.00846400 |
| H | -3.12134400 | 3.63907200  | -2.18918900 |
| C | -0.56279800 | 5.78722500  | -1.13059400 |
| H | 0.28879700  | 5.20731900  | -1.51919800 |
| H | -0.25776600 | 6.26276500  | -0.18955800 |
| H | -0.79194700 | 6.57578200  | -1.86187400 |
| C | -2.98580600 | 5.76187300  | -0.41469000 |
| H | -3.22829900 | 6.52293400  | -1.17142200 |
| H | -2.72399200 | 6.27910500  | 0.51949900  |
| H | -3.88822100 | 5.15539600  | -0.24522800 |
| C | 0.09997300  | -1.40263700 | 6.28291100  |
| H | -0.82219300 | -1.01489600 | 6.74631200  |
| H | 0.94391600  | -0.90842500 | 6.78465700  |
| H | 0.15045100  | -2.47690800 | 6.51013900  |
| C | 2.61274500  | -2.33798400 | -1.83939600 |
| C | 2.78667400  | -3.14462400 | -3.14019400 |
| C | 1.88228500  | -2.55586800 | -4.23885500 |
| H | 2.08522300  | -3.07209300 | -5.18768000 |
| H | 2.07320800  | -1.48509900 | -4.38412400 |
| H | 0.81796900  | -2.69117000 | -4.00139900 |
| C | 2.47198600  | -4.64551400 | -2.95409300 |

|   |             |             |             |
|---|-------------|-------------|-------------|
| H | 2.53313500  | -5.14451300 | -3.93129500 |
| H | 1.45661700  | -4.81278200 | -2.56444700 |
| H | 3.19994300  | -5.16963300 | -2.31039200 |
| C | 4.27755600  | -2.97666600 | -3.54937700 |
| H | 4.96614700  | -3.36409200 | -2.78311400 |
| H | 4.52172400  | -1.92243600 | -3.74361200 |
| H | 4.45716000  | -3.53784700 | -4.47792100 |
| N | 1.03754900  | 1.39748100  | -1.31187100 |
| O | 1.03344000  | 2.40629000  | -1.90479900 |
| N | -1.21271900 | -1.85698900 | -1.65400200 |
| O | -1.36979900 | -2.58459700 | -2.57060600 |
| O | -1.98781100 | 0.80270600  | -1.79773600 |
| C | -2.14676900 | 0.85910000  | -3.13711200 |
| O | -3.22187300 | 1.17814300  | -3.62979000 |
| C | -0.92901300 | 0.57478800  | -3.99565600 |
| H | -0.14683400 | 0.02236800  | -3.46168100 |
| H | -1.23913200 | 0.02939200  | -4.89647700 |
| H | -0.50982900 | 1.53689600  | -4.32968800 |

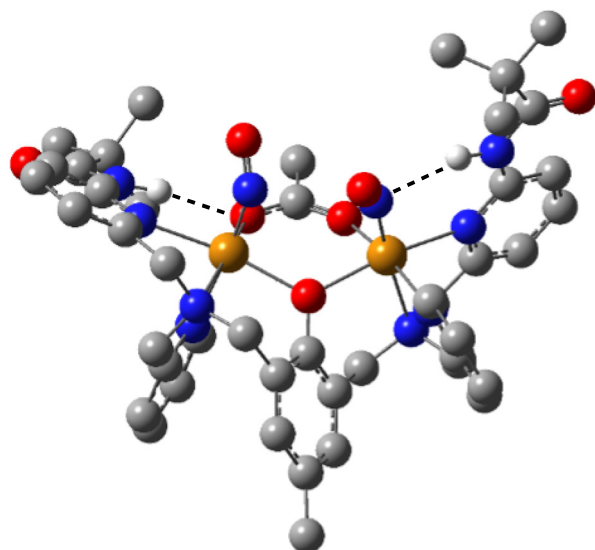

**Figure S27.** DFT-optimized structure of **2(NO)<sub>2</sub>** using BP86/TZVP with hydrogen atoms (except for amide N-H groups) omitted for clarity. Hydrogen bonds are shown with dashed lines.

**Table S17.** DFT-optimized coordinates (Å) of **2(NO)<sub>2</sub>** using BP86/TZVP.

|    | X           | Y           | Z           |
|----|-------------|-------------|-------------|
| Fe | -1.86645700 | 0.06316500  | -0.30133800 |
| Fe | 1.71952400  | -0.00285200 | 0.64784200  |
| O  | -0.07774000 | 1.07697500  | 0.20810000  |
| O  | -0.65038400 | -1.25976200 | -1.37948600 |
| O  | 1.56247000  | -1.34506800 | -0.90007200 |

|   |             |             |             |
|---|-------------|-------------|-------------|
| O | -6.61180100 | -3.30889000 | 0.17347600  |
| O | 6.64216200  | -2.82231700 | -0.19791800 |
| N | -3.04207700 | 1.71251600  | 0.48967700  |
| N | -2.05973000 | 1.37625500  | -2.06278100 |
| N | -3.57612600 | -0.86871900 | -1.53682100 |
| N | 2.86884600  | 1.31227900  | -0.63642000 |
| N | 2.21858500  | 1.68245600  | 2.03617400  |
| N | 3.63061400  | -0.63199700 | 1.68936600  |
| N | -4.62146900 | -2.14597700 | 0.12811800  |
| H | -3.81340100 | -1.87897000 | 0.68834000  |
| N | 4.46796700  | -2.09773300 | 0.05084600  |
| H | 3.56954900  | -1.97670200 | -0.42704600 |
| C | -3.30908700 | 1.93866100  | 1.79618300  |
| H | -2.93613600 | 1.20244300  | 2.50904000  |
| C | -4.02330300 | 3.04709500  | 2.23919600  |
| H | -4.22083600 | 3.17364900  | 3.30400100  |
| C | -4.46887500 | 3.97951300  | 1.29743800  |
| H | -5.03090000 | 4.86193900  | 1.60851900  |
| C | 0.49619600  | -1.78704400 | -1.48199100 |
| C | -4.18027300 | 3.76229800  | -0.04853200 |
| H | -4.50493800 | 4.47044300  | -0.81296200 |
| C | 0.62859500  | -3.02145300 | -2.34477100 |
| H | -0.22635400 | -3.11236600 | -3.02398800 |
| H | 0.64180100  | -3.90670200 | -1.68902800 |
| H | 1.56959900  | -3.01711600 | -2.90805600 |
| C | -3.46671400 | 2.61893500  | -0.42366700 |
| C | -3.21699000 | 2.29558400  | -1.87106900 |
| H | -4.11753300 | 1.79595500  | -2.26437500 |
| H | -3.08217500 | 3.22011000  | -2.45732800 |
| C | 3.00334000  | 1.16098900  | -1.97288800 |
| H | 2.55244900  | 0.26062100  | -2.39116900 |
| C | 3.68546000  | 2.07561900  | -2.77009600 |
| H | 3.77657400  | 1.90273100  | -3.84292300 |
| C | 4.24368500  | 3.20580800  | -2.16454000 |
| H | 4.78368700  | 3.94651700  | -2.75710700 |
| C | 4.10469100  | 3.36855400  | -0.78663600 |
| H | 4.53054300  | 4.23663500  | -0.28013100 |
| C | 3.41597900  | 2.40017300  | -0.04773900 |
| C | 3.33824100  | 2.48155300  | 1.45853600  |
| H | 4.28493600  | 2.08669900  | 1.86161500  |
| H | 3.27049500  | 3.53330500  | 1.78155200  |
| C | -0.79827900 | 2.14308900  | -2.32770700 |
| H | -0.92572300 | 2.74551600  | -3.24568100 |
| H | -0.02127800 | 1.38716300  | -2.52162200 |
| C | -0.38135900 | 3.02567800  | -1.18326800 |
| C | -0.30286300 | 4.41832000  | -1.31477600 |

|   |             |             |             |
|---|-------------|-------------|-------------|
| H | -0.59485300 | 4.87607700  | -2.26543600 |
| C | 0.15776900  | 5.24237300  | -0.27441700 |
| C | 0.19337700  | 6.74384900  | -0.42022900 |
| H | 0.31143700  | 7.04538500  | -1.47046700 |
| H | 1.01683600  | 7.18786300  | 0.15674600  |
| H | -0.74068500 | 7.19980000  | -0.05241300 |
| C | 0.57653000  | 4.61400800  | 0.91099200  |
| H | 0.95989400  | 5.22837200  | 1.73201700  |
| C | 0.51757600  | 3.22495000  | 1.07659400  |
| C | 0.00855900  | 2.42112000  | 0.03209500  |
| C | 1.02213600  | 2.54478900  | 2.32047800  |
| H | 1.28663400  | 3.29520900  | 3.08760100  |
| H | 0.25366400  | 1.87846200  | 2.74277700  |
| C | -4.57360600 | -1.73965600 | -1.19873400 |
| C | -5.49589500 | -2.21613500 | -2.15946800 |
| H | -6.28087600 | -2.89451500 | -1.83510900 |
| C | -5.37949500 | -1.79437100 | -3.47333500 |
| H | -6.08758300 | -2.15425900 | -4.22198600 |
| C | -4.35502900 | -0.90870100 | -3.82910200 |
| H | -4.24116500 | -0.55250200 | -4.85381300 |
| C | -3.47816200 | -0.48170100 | -2.83945200 |
| C | -2.33610000 | 0.44210200  | -3.18607500 |
| H | -1.42243000 | -0.14724800 | -3.35367100 |
| H | -2.56255400 | 0.99528200  | -4.11511900 |
| C | 4.57620400  | -1.54346400 | 1.32239500  |
| C | 5.61000500  | -1.91515800 | 2.21420600  |
| H | 6.34648200  | -2.64522400 | 1.89220200  |
| C | 5.67870200  | -1.31817500 | 3.46197100  |
| H | 6.47325400  | -1.60162500 | 4.15440100  |
| C | 4.73293700  | -0.35028800 | 3.82188600  |
| H | 4.77695100  | 0.15896400  | 4.78553200  |
| C | 3.72119800  | -0.05105800 | 2.91936500  |
| C | 2.66144600  | 0.97233000  | 3.26240600  |
| H | 1.77540000  | 0.48439900  | 3.70132500  |
| H | 3.05457900  | 1.67629400  | 4.01829200  |
| C | -5.60822400 | -2.94470400 | 0.76349700  |
| C | -5.31525900 | -3.29379900 | 2.24057600  |
| C | -6.42353900 | -4.24173300 | 2.73320500  |
| H | -7.41489300 | -3.77689100 | 2.65190900  |
| H | -6.24295800 | -4.49741400 | 3.78754300  |
| H | -6.44404200 | -5.17204700 | 2.14942200  |
| C | -3.94475100 | -4.00015200 | 2.36519000  |
| H | -3.90498000 | -4.90517900 | 1.74113200  |
| H | -3.78731000 | -4.30615400 | 3.41006400  |
| H | -3.09588200 | -3.35581800 | 2.08692600  |
| C | -5.33977700 | -1.99772300 | 3.08675100  |

|   |             |             |             |
|---|-------------|-------------|-------------|
| H | -4.54626600 | -1.28897400 | 2.80263900  |
| H | -5.18894400 | -2.25107900 | 4.14672600  |
| H | -6.30840200 | -1.48421000 | 2.99681800  |
| C | 5.51082900  | -2.76177900 | -0.65066200 |
| C | 5.10660700  | -3.41522900 | -1.99028900 |
| C | 6.37240100  | -4.00101500 | -2.64062600 |
| H | 7.11615400  | -3.21960400 | -2.84888900 |
| H | 6.10340600  | -4.48760900 | -3.58981100 |
| H | 6.84829100  | -4.74651800 | -1.99043900 |
| C | 4.10314800  | -4.55656500 | -1.69588500 |
| H | 4.55227400  | -5.31479900 | -1.03780200 |
| H | 3.82457300  | -5.05406400 | -2.63730300 |
| H | 3.18184700  | -4.19399100 | -1.21591000 |
| C | 4.48539900  | -2.36831800 | -2.94190300 |
| H | 3.55229300  | -1.93782400 | -2.54649500 |
| H | 4.25144900  | -2.84556500 | -3.90576600 |
| H | 5.19005400  | -1.54632200 | -3.13922800 |
| N | -1.91892900 | -0.81024000 | 1.20935400  |
| O | -1.88983800 | -0.74000200 | 2.38718900  |
| N | 0.96166700  | -1.16093800 | 1.72872700  |
| O | 1.01041400  | -2.25556400 | 2.14752500  |
